# Supplementary material for: Comprehensive androgen-dependent transcriptome analysis in human genital tissue
Source: BMC Genomics. 2025 Nov 17;26:1047. doi: 10.1186/s12864-025-12212-6 (PMC12621392; doi:10.1186/s12864-025-12212-6)
Supplement: Supplementary file 4 — Supplementary Material 4. [file 12864_2025_12212_MOESM4_ESM.xlsx]

## Sheet: Glossary
Sheet Name	Description
GSF-F_up-regulated	Contains enriched GO Biological Process terms identified for up-regulated genes in GSF-F samples						Each sheet includes Gene Ontology (GO) biological process terms,fold enrichment, FDR values, and the number of genes contributing to each term.
GSF-F_down-regulated	Contains enriched GO Biological Process terms identified for down-regulated genes in GSF-F samples
GSF-F_log2FC > 0.5	Contains enriched GO Biological Process terms identified for up-regulated genes with log2FC > 0.5 in GSF-F samples
GSF-S_up-regulated	Contains enriched GO Biological Process terms identified for up-regulated genes in GSF-S samples
GSF-S_down-regulated	Contains enriched GO Biological Process terms identified for down-regulated genes in GSF-S samples
GSF-S_log2FC > 0.5	Contains enriched GO Biological Process terms identified for up-regulated genes with log2FC > 0.5 in GSF-S samples

## Sheet: GSF-F_up-regulated
Analysis Type:	PANTHER Overrepresentation Test (Released 20240807)
Annotation Version and Release Date:	GO Ontology database DOI: 10.5281/zenodo.15066566 Released 2025-03-16
Analyzed List:	Client Text Box Input (Homo sapiens)
Reference List:	Homo sapiens (all genes in database)
Test Type:	FISHER
Correction:	FDR
GO biological process complete	Homo sapiens - REFLIST (20580)	Client Text Box Input (748)	Client Text Box Input (expected)	Client Text Box Input (over/under)	Client Text Box Input (fold Enrichment)	Client Text Box Input (raw P-value)	Client Text Box Input (FDR)
vestibulocochlear nerve structural organization (GO:0021649)	2	2	0.07	+	27.51	0.00132	0.0412
positive regulation of presynaptic membrane organization (GO:1901631)	2	2	0.07	+	27.51	0.00132	0.0411
regulation of presynaptic membrane organization (GO:1901629)	2	2	0.07	+	27.51	0.00132	0.041
dorsal root ganglion morphogenesis (GO:1904835)	2	2	0.07	+	27.51	0.00132	0.0409
very long-chain fatty-acyl-CoA metabolic process (GO:0036111)	2	2	0.07	+	27.51	0.00132	0.0408
dendrite regeneration (GO:0031104)	2	2	0.07	+	27.51	0.00132	0.0407
ganglion morphogenesis (GO:0061552)	2	2	0.07	+	27.51	0.00132	0.0406
facioacoustic ganglion development (GO:1903375)	2	2	0.07	+	27.51	0.00132	0.0406
lateral sprouting involved in mammary gland duct morphogenesis (GO:0060599)	2	2	0.07	+	27.51	0.00132	0.0405
regulation of basement membrane organization (GO:0110011)	6	4	0.22	+	18.34	2.45e-05	0.00179
positive regulation of integrin-mediated signaling pathway (GO:2001046)	13	7	0.47	+	14.81	1.16e-07	1.92e-05
L-aspartate import across plasma membrane (GO:0140009)	6	3	0.22	+	13.76	0.000881	0.0311
neural crest cell migration involved in autonomic nervous system development (GO:1901166)	6	3	0.22	+	13.76	0.000881	0.031
hemidesmosome assembly (GO:0031581)	6	3	0.22	+	13.76	0.000881	0.0309
regulation of prostatic bud formation (GO:0060685)	6	3	0.22	+	13.76	0.000881	0.0309
hypothalamic tangential migration using cell-axon interactions (GO:0021856)	6	3	0.22	+	13.76	0.000881	0.0308
gonadotrophin-releasing hormone neuronal migration to the hypothalamus (GO:0021828)	6	3	0.22	+	13.76	0.000881	0.0307
regulation of platelet-derived growth factor receptor-beta signaling pathway (GO:2000586)	8	4	0.29	+	13.76	0.000108	0.00614
elastic fiber assembly (GO:0048251)	11	5	0.4	+	12.51	2.41e-05	0.00178
mesenchymal-epithelial cell signaling (GO:0060638)	9	4	0.33	+	12.23	0.000188	0.00966
regulation of calcium ion-dependent exocytosis of neurotransmitter (GO:1903233)	7	3	0.25	+	11.79	0.0015	0.0451
cell-cell adhesion mediated by integrin (GO:0033631)	7	3	0.25	+	11.79	0.0015	0.045
maintenance of protein location in extracellular region (GO:0071694)	7	3	0.25	+	11.79	0.0015	0.0449
negative regulation of plasminogen activation (GO:0010757)	7	3	0.25	+	11.79	0.0015	0.0448
transition between fast and slow fiber (GO:0014883)	7	3	0.25	+	11.79	0.0015	0.0447
response to glycoside (GO:1903416)	7	3	0.25	+	11.79	0.0015	0.0446
regulation of integrin-mediated signaling pathway (GO:2001044)	23	9	0.84	+	10.77	5.45e-08	1.05e-05
negative regulation of osteoblast proliferation (GO:0033689)	11	4	0.4	+	10	0.000466	0.0195
negative regulation of transforming growth factor beta production (GO:0071635)	11	4	0.4	+	10	0.000466	0.0195
neuron projection extension involved in neuron projection guidance (GO:1902284)	11	4	0.4	+	10	0.000466	0.0194
development of secondary sexual characteristics (GO:0045136)	11	4	0.4	+	10	0.000466	0.0194
axon extension involved in axon guidance (GO:0048846)	11	4	0.4	+	10	0.000466	0.0193
protein homotrimerization (GO:0070207)	15	5	0.55	+	9.17	0.000139	0.00758
nucleoside triphosphate catabolic process (GO:0009143)	12	4	0.44	+	9.17	0.000678	0.0255
negative regulation of alcohol biosynthetic process (GO:1902931)	12	4	0.44	+	9.17	0.000678	0.0254
extracellular matrix assembly (GO:0085029)	31	10	1.13	+	8.88	8.4e-08	1.45e-05
wound healing, spreading of epidermal cells (GO:0035313)	16	5	0.58	+	8.6	0.000196	0.01
membrane raft assembly (GO:0001765)	13	4	0.47	+	8.47	0.000952	0.0324
angiotensin maturation (GO:0002003)	13	4	0.47	+	8.47	0.000952	0.0323
relaxation of cardiac muscle (GO:0055119)	13	4	0.47	+	8.47	0.000952	0.0323
maintenance of protein localization in endoplasmic reticulum (GO:0035437)	13	4	0.47	+	8.47	0.000952	0.0322
cardiac muscle cell apoptotic process (GO:0010659)	13	4	0.47	+	8.47	0.000952	0.0321
regulation of osteoblast proliferation (GO:0033688)	27	8	0.98	+	8.15	3.52e-06	0.000355
regulation of ferroptosis (GO:0110075)	17	5	0.62	+	8.09	0.000269	0.013
regulation of plasminogen activation (GO:0010755)	17	5	0.62	+	8.09	0.000269	0.0129
regulation of angiotensin levels in blood (GO:0002002)	14	4	0.51	+	7.86	0.00129	0.0407
UDP-N-acetylglucosamine metabolic process (GO:0006047)	14	4	0.51	+	7.86	0.00129	0.0406
striated muscle cell apoptotic process (GO:0010658)	14	4	0.51	+	7.86	0.00129	0.0406
relaxation of muscle (GO:0090075)	21	6	0.76	+	7.86	7.68e-05	0.00466
epithelial cell-cell adhesion (GO:0090136)	18	5	0.65	+	7.64	0.000361	0.0158
protein trimerization (GO:0070206)	18	5	0.65	+	7.64	0.000361	0.0158
negative regulation of platelet activation (GO:0010544)	18	5	0.65	+	7.64	0.000361	0.0157
phenol-containing compound catabolic process (GO:0019336)	15	4	0.55	+	7.34	0.00171	0.0497
peptidyl-S-diacylglycerol-L-cysteine biosynthetic process from peptidyl-cysteine (GO:0018231)	15	4	0.55	+	7.34	0.00171	0.0496
peptidyl-L-cysteine S-palmitoylation (GO:0018230)	15	4	0.55	+	7.34	0.00171	0.0495
positive regulation of non-canonical Wnt signaling pathway (GO:2000052)	15	4	0.55	+	7.34	0.00171	0.0494
positive regulation of fibroblast migration (GO:0010763)	15	4	0.55	+	7.34	0.00171	0.0493
cardiac muscle hypertrophy in response to stress (GO:0014898)	15	4	0.55	+	7.34	0.00171	0.0492
cardiac muscle adaptation (GO:0014887)	15	4	0.55	+	7.34	0.00171	0.0491
muscle hypertrophy in response to stress (GO:0003299)	15	4	0.55	+	7.34	0.00171	0.0491
regulation of systemic arterial blood pressure by circulatory renin-angiotensin (GO:0001991)	19	5	0.69	+	7.24	0.000476	0.0195
NADPH regeneration (GO:0006740)	19	5	0.69	+	7.24	0.000476	0.0195
basement membrane organization (GO:0071711)	35	9	1.27	+	7.07	3.18e-06	0.000325
amine catabolic process (GO:0009310)	20	5	0.73	+	6.88	0.000616	0.0236
biogenic amine catabolic process (GO:0042402)	20	5	0.73	+	6.88	0.000616	0.0236
retina vasculature development in camera-type eye (GO:0061298)	20	5	0.73	+	6.88	0.000616	0.0235
regulation of animal organ formation (GO:0003156)	29	7	1.05	+	6.64	6.32e-05	0.00407
positive regulation by host of viral process (GO:0044794)	21	5	0.76	+	6.55	0.000784	0.0285
regulation of platelet-derived growth factor receptor signaling pathway (GO:0010640)	26	6	0.94	+	6.35	0.000279	0.0131
nitric oxide biosynthetic process (GO:0006809)	22	5	0.8	+	6.25	0.000984	0.033
negative regulation of organic acid transport (GO:0032891)	22	5	0.8	+	6.25	0.000984	0.0329
cell-substrate junction assembly (GO:0007044)	40	9	1.45	+	6.19	1.05e-05	0.000867
negative regulation of cell junction assembly (GO:1901889)	32	7	1.16	+	6.02	0.000124	0.00685
organ induction (GO:0001759)	23	5	0.84	+	5.98	0.00122	0.0392
positive regulation of endothelial cell apoptotic process (GO:2000353)	23	5	0.84	+	5.98	0.00122	0.0391
regulation of cell-cell adhesion mediated by cadherin (GO:2000047)	23	5	0.84	+	5.98	0.00122	0.0391
cell-substrate junction organization (GO:0150115)	42	9	1.53	+	5.9	1.6e-05	0.00122
regulation of extracellular matrix organization (GO:1903053)	61	13	2.22	+	5.86	2.28e-07	3.38e-05
regulation of systemic arterial blood pressure by renin-angiotensin (GO:0003081)	29	6	1.05	+	5.69	0.000524	0.0208
O-glycan processing (GO:0016266)	39	8	1.42	+	5.64	6.64e-05	0.00424
epiboly involved in wound healing (GO:0090505)	30	6	1.09	+	5.5	0.000636	0.0241
wound healing, spreading of cells (GO:0044319)	30	6	1.09	+	5.5	0.000636	0.024
platelet-derived growth factor receptor signaling pathway (GO:0048008)	35	7	1.27	+	5.5	0.000225	0.0113
collagen fibril organization (GO:0030199)	65	13	2.36	+	5.5	4.99e-07	6.85e-05
blood vessel remodeling (GO:0001974)	41	8	1.49	+	5.37	9.67e-05	0.00557
positive regulation of cholesterol transport (GO:0032376)	36	7	1.31	+	5.35	0.000271	0.013
positive regulation of sterol transport (GO:0032373)	36	7	1.31	+	5.35	0.000271	0.0129
epiboly (GO:0090504)	31	6	1.13	+	5.33	0.000764	0.028
apoptotic cell clearance (GO:0043277)	37	7	1.34	+	5.21	0.000324	0.0147
aorta morphogenesis (GO:0035909)	32	6	1.16	+	5.16	0.000912	0.0314
regulation of morphogenesis of a branching structure (GO:0060688)	55	10	2	+	5	2.52e-05	0.00182
extracellular matrix organization (GO:0030198)	289	52	10.5	+	4.95	6.67e-22	3.3e-18
maintenance of blood-brain barrier (GO:0035633)	39	7	1.42	+	4.94	0.000454	0.0192
regulation of cellular extravasation (GO:0002691)	39	7	1.42	+	4.94	0.000454	0.0192
extracellular structure organization (GO:0043062)	290	52	10.54	+	4.93	7.86e-22	2.91e-18
external encapsulating structure organization (GO:0045229)	291	52	10.58	+	4.92	9.25e-22	2.74e-18
positive regulation of fibroblast proliferation (GO:0048146)	56	10	2.04	+	4.91	2.97e-05	0.00209
regulation of fibroblast growth factor receptor signaling pathway (GO:0040036)	34	6	1.24	+	4.86	0.00127	0.0403
modified amino acid transport (GO:0072337)	40	7	1.45	+	4.81	0.000533	0.021
negative regulation of blood coagulation (GO:0030195)	46	8	1.67	+	4.78	0.000225	0.0113
positive regulation of animal organ morphogenesis (GO:0110110)	35	6	1.27	+	4.72	0.00149	0.0449
developmental induction (GO:0031128)	35	6	1.27	+	4.72	0.00149	0.0448
negative regulation of hemostasis (GO:1900047)	47	8	1.71	+	4.68	0.000263	0.0129
negative regulation of cell-matrix adhesion (GO:0001953)	36	6	1.31	+	4.59	0.00173	0.0495
axon extension (GO:0048675)	48	8	1.74	+	4.59	0.000305	0.014
platelet aggregation (GO:0070527)	48	8	1.74	+	4.59	0.000305	0.014
cell adhesion mediated by integrin (GO:0033627)	42	7	1.53	+	4.59	0.000724	0.0269
negative regulation of endothelial cell proliferation (GO:0001937)	42	7	1.53	+	4.59	0.000724	0.0268
regulation of animal organ morphogenesis (GO:2000027)	84	14	3.05	+	4.59	1.87e-06	0.00021
integrin-mediated signaling pathway (GO:0007229)	98	16	3.56	+	4.49	4.65e-07	6.5e-05
negative regulation of coagulation (GO:0050819)	49	8	1.78	+	4.49	0.000353	0.0157
regulation of systemic arterial blood pressure by hormone (GO:0001990)	43	7	1.56	+	4.48	0.000838	0.0301
amino sugar metabolic process (GO:0006040)	43	7	1.56	+	4.48	0.000838	0.03
positive regulation of substrate adhesion-dependent cell spreading (GO:1900026)	43	7	1.56	+	4.48	0.000838	0.0299
negative regulation of ossification (GO:0030279)	43	7	1.56	+	4.48	0.000838	0.0299
regulation of morphogenesis of an epithelium (GO:1905330)	68	11	2.47	+	4.45	3.15e-05	0.00219
regulation of systemic arterial blood pressure mediated by a chemical signal (GO:0003044)	50	8	1.82	+	4.4	0.000407	0.0175
artery morphogenesis (GO:0048844)	69	11	2.51	+	4.39	3.62e-05	0.00247
positive regulation of bone mineralization (GO:0030501)	44	7	1.6	+	4.38	0.000966	0.0325
regulation of ossification (GO:0030278)	126	20	4.58	+	4.37	2.86e-08	5.8e-06
nucleotide-sugar metabolic process (GO:0009225)	45	7	1.64	+	4.28	0.00111	0.036
homotypic cell-cell adhesion (GO:0034109)	65	10	2.36	+	4.23	0.000111	0.00628
chondrocyte differentiation (GO:0002062)	85	13	3.09	+	4.21	1.15e-05	0.000937
semaphorin-plexin signaling pathway (GO:0071526)	46	7	1.67	+	4.19	0.00127	0.0404
endodermal cell differentiation (GO:0035987)	46	7	1.67	+	4.19	0.00127	0.0403
substrate adhesion-dependent cell spreading (GO:0034446)	46	7	1.67	+	4.19	0.00127	0.0402
actin polymerization or depolymerization (GO:0008154)	60	9	2.18	+	4.13	0.000296	0.0138
negative regulation of wound healing (GO:0061045)	67	10	2.44	+	4.11	0.000144	0.00783
bone mineralization (GO:0030282)	61	9	2.22	+	4.06	0.000337	0.015
regulation of blood coagulation (GO:0030193)	68	10	2.47	+	4.05	0.000164	0.0086
cell-matrix adhesion (GO:0007160)	137	20	4.98	+	4.02	1.2e-07	1.97e-05
lung alveolus development (GO:0048286)	55	8	2	+	4	0.000788	0.0285
positive regulation of ossification (GO:0045778)	56	8	2.04	+	3.93	0.00089	0.031
endoderm formation (GO:0001706)	56	8	2.04	+	3.93	0.00089	0.0309
regulation of endothelial cell apoptotic process (GO:2000351)	56	8	2.04	+	3.93	0.00089	0.0308
regulation of hemostasis (GO:1900046)	70	10	2.54	+	3.93	0.000209	0.0106
water-soluble vitamin metabolic process (GO:0006767)	63	9	2.29	+	3.93	0.000431	0.0184
regulation of smooth muscle cell migration (GO:0014910)	63	9	2.29	+	3.93	0.000431	0.0184
positive regulation of mononuclear cell migration (GO:0071677)	98	14	3.56	+	3.93	1.2e-05	0.000956
negative regulation of response to wounding (GO:1903035)	91	13	3.31	+	3.93	2.45e-05	0.00179
positive regulation of osteoblast differentiation (GO:0045669)	71	10	2.58	+	3.88	0.000236	0.0118
glycosphingolipid metabolic process (GO:0006687)	64	9	2.33	+	3.87	0.000485	0.0197
regulation of focal adhesion assembly (GO:0051893)	64	9	2.33	+	3.87	0.000485	0.0197
regulation of cell-substrate junction assembly (GO:0090109)	64	9	2.33	+	3.87	0.000485	0.0196
regulation of cytosolic calcium ion concentration (GO:0051480)	57	8	2.07	+	3.86	0.001	0.0334
vascular transport (GO:0010232)	87	12	3.16	+	3.79	7.09e-05	0.00441
transport across blood-brain barrier (GO:0150104)	87	12	3.16	+	3.79	7.09e-05	0.0044
regulation of biomineral tissue development (GO:0070167)	102	14	3.71	+	3.78	1.91e-05	0.00143
regulation of bone mineralization (GO:0030500)	81	11	2.94	+	3.74	0.000162	0.00862
cellular response to ketone (GO:1901655)	111	15	4.03	+	3.72	1.18e-05	0.000944
cell-substrate adhesion (GO:0031589)	185	25	6.72	+	3.72	1.6e-08	3.65e-06
regulation of cholesterol transport (GO:0032374)	60	8	2.18	+	3.67	0.00141	0.0429
regulation of sterol transport (GO:0032371)	60	8	2.18	+	3.67	0.00141	0.0428
regulation of coagulation (GO:0050818)	75	10	2.73	+	3.67	0.000371	0.0161
endoplasmic reticulum unfolded protein response (GO:0030968)	60	8	2.18	+	3.67	0.00141	0.0427
positive regulation of cell-substrate adhesion (GO:0010811)	128	17	4.65	+	3.65	3.99e-06	0.000394
positive regulation of fat cell differentiation (GO:0045600)	68	9	2.47	+	3.64	0.000763	0.0281
artery development (GO:0060840)	106	14	3.85	+	3.63	2.98e-05	0.00209
developmental growth involved in morphogenesis (GO:0060560)	144	19	5.23	+	3.63	1.21e-06	0.000147
glomerulus development (GO:0032835)	61	8	2.22	+	3.61	0.00157	0.0465
regulation of substrate adhesion-dependent cell spreading (GO:1900024)	61	8	2.22	+	3.61	0.00157	0.0464
regulation of mononuclear cell migration (GO:0071675)	145	19	5.27	+	3.61	1.35e-06	0.00016
epithelial to mesenchymal transition (GO:0001837)	84	11	3.05	+	3.6	0.000225	0.0113
regulation of cell-substrate junction organization (GO:0150116)	69	9	2.51	+	3.59	0.00085	0.0302
actin filament bundle assembly (GO:0051017)	62	8	2.25	+	3.55	0.00175	0.0497
angiogenesis (GO:0001525)	351	45	12.76	+	3.53	1.94e-13	1.03e-10
proteoglycan biosynthetic process (GO:0030166)	78	10	2.83	+	3.53	0.000511	0.0204
regulation of smooth muscle cell proliferation (GO:0048660)	136	17	4.94	+	3.44	9.13e-06	0.000764
regulation of tissue remodeling (GO:0034103)	72	9	2.62	+	3.44	0.00116	0.0374
regulation of release of sequestered calcium ion into cytosol (GO:0051279)	80	10	2.91	+	3.44	0.000627	0.0239
blood vessel morphogenesis (GO:0048514)	442	55	16.06	+	3.42	1.37e-15	1.2e-12
wound healing (GO:0042060)	334	41	12.14	+	3.38	9.62e-12	3.96e-09
proteoglycan metabolic process (GO:0006029)	106	13	3.85	+	3.37	0.000123	0.00686
sphingolipid biosynthetic process (GO:0030148)	106	13	3.85	+	3.37	0.000123	0.00684
regulation of sequestering of calcium ion (GO:0051282)	131	16	4.76	+	3.36	2.23e-05	0.00166
regulation of endothelial cell migration (GO:0010594)	172	21	6.25	+	3.36	1.23e-06	0.000148
positive regulation of smooth muscle cell proliferation (GO:0048661)	82	10	2.98	+	3.36	0.000764	0.028
regulation of cell-matrix adhesion (GO:0001952)	123	15	4.47	+	3.36	4.06e-05	0.00274
lung development (GO:0030324)	197	24	7.16	+	3.35	2.27e-07	3.39e-05
symbiont entry into host (GO:0044409)	115	14	4.18	+	3.35	7.42e-05	0.00454
symbiont entry into host cell (GO:0046718)	115	14	4.18	+	3.35	7.42e-05	0.00452
positive regulation of endothelial cell proliferation (GO:0001938)	92	11	3.34	+	3.29	0.000502	0.0201
regulation of fibroblast proliferation (GO:0048145)	92	11	3.34	+	3.29	0.000502	0.0201
regulation of endothelial cell proliferation (GO:0001936)	134	16	4.87	+	3.29	2.96e-05	0.0021
respiratory tube development (GO:0030323)	201	24	7.31	+	3.29	3.3e-07	4.7e-05
positive regulation of endothelial cell migration (GO:0010595)	109	13	3.96	+	3.28	0.000164	0.00858
neuron projection extension (GO:1990138)	84	10	3.05	+	3.28	0.000924	0.0317
regulation of cell-substrate adhesion (GO:0010810)	219	26	7.96	+	3.27	1.21e-07	1.96e-05
endoderm development (GO:0007492)	85	10	3.09	+	3.24	0.00101	0.0336
platelet activation (GO:0030168)	102	12	3.71	+	3.24	0.000329	0.0148
negative regulation of transmembrane receptor protein serine/threonine kinase signaling pathway (GO:0090101)	153	18	5.56	+	3.24	1.18e-05	0.000949
blood vessel development (GO:0001568)	537	63	19.52	+	3.23	1.94e-16	2.39e-13
cartilage development (GO:0051216)	179	21	6.51	+	3.23	2.36e-06	0.000248
regulation of transmembrane receptor protein serine/threonine kinase signaling pathway (GO:0090092)	274	32	9.96	+	3.21	6.4e-09	1.69e-06
mesenchymal cell differentiation (GO:0048762)	174	20	6.32	+	3.16	5.6e-06	0.000506
vasculature development (GO:0001944)	561	64	20.39	+	3.14	4.36e-16	4.97e-13
regulation of response to wounding (GO:1903034)	167	19	6.07	+	3.13	1.11e-05	0.000905
vitamin metabolic process (GO:0006766)	106	12	3.85	+	3.11	0.00047	0.0194
positive regulation of transmembrane receptor protein serine/threonine kinase signaling pathway (GO:0090100)	106	12	3.85	+	3.11	0.00047	0.0194
positive regulation of vasculature development (GO:1904018)	168	19	6.11	+	3.11	1.21e-05	0.000955
hemostasis (GO:0007599)	195	22	7.09	+	3.1	2.63e-06	0.000275
regulation of osteoblast differentiation (GO:0045667)	133	15	4.83	+	3.1	0.000101	0.00578
transition metal ion transport (GO:0000041)	98	11	3.56	+	3.09	0.000859	0.0305
developmental cell growth (GO:0048588)	116	13	4.22	+	3.08	0.000306	0.014
respiratory system development (GO:0060541)	225	25	8.18	+	3.06	7.42e-07	9.48e-05
ceramide metabolic process (GO:0006672)	99	11	3.6	+	3.06	0.000936	0.032
tissue remodeling (GO:0048771)	117	13	4.25	+	3.06	0.000333	0.0149
epithelial cell proliferation (GO:0050673)	189	21	6.87	+	3.06	5.63e-06	0.000506
regulation of transforming growth factor beta receptor signaling pathway (GO:0017015)	144	16	5.23	+	3.06	7.16e-05	0.00442
blood coagulation (GO:0007596)	189	21	6.87	+	3.06	5.63e-06	0.000503
regulation of fat cell differentiation (GO:0045598)	135	15	4.91	+	3.06	0.000119	0.00669
response to wounding (GO:0009611)	451	50	16.39	+	3.05	2.4e-12	1.04e-09
cell growth (GO:0016049)	118	13	4.29	+	3.03	0.000362	0.0157
regulation of striated muscle contraction (GO:0006942)	100	11	3.63	+	3.03	0.00102	0.0337
protein O-linked glycosylation (GO:0006493)	100	11	3.63	+	3.03	0.00102	0.0336
coagulation (GO:0050817)	191	21	6.94	+	3.03	6.64e-06	0.000586
positive regulation of angiogenesis (GO:0045766)	164	18	5.96	+	3.02	3.05e-05	0.00213
negative regulation of epithelial cell proliferation (GO:0050680)	137	15	4.98	+	3.01	0.000141	0.00767
regulation of cellular response to transforming growth factor beta stimulus (GO:1903844)	147	16	5.34	+	2.99	9.17e-05	0.00537
heart contraction (GO:0060047)	102	11	3.71	+	2.97	0.0012	0.0386
regulation of cellular response to growth factor stimulus (GO:0090287)	325	35	11.81	+	2.96	1.05e-08	2.6e-06
regulation of wound healing (GO:0061041)	130	14	4.72	+	2.96	0.000276	0.0131
negative regulation of canonical Wnt signaling pathway (GO:0090090)	140	15	5.09	+	2.95	0.000179	0.00936
transforming growth factor beta receptor signaling pathway (GO:0007179)	103	11	3.74	+	2.94	0.0013	0.0406
bone development (GO:0060348)	197	21	7.16	+	2.93	1.08e-05	0.000885
connective tissue development (GO:0061448)	244	26	8.87	+	2.93	1e-06	0.000124
regulation of leukocyte migration (GO:0002685)	227	24	8.25	+	2.91	2.98e-06	0.000306
formation of primary germ layer (GO:0001704)	123	13	4.47	+	2.91	0.000541	0.0213
response to transforming growth factor beta (GO:0071559)	161	17	5.85	+	2.91	8.19e-05	0.00491
positive regulation of leukocyte migration (GO:0002687)	152	16	5.52	+	2.9	0.000136	0.00747
sphingolipid metabolic process (GO:0006665)	162	17	5.89	+	2.89	8.84e-05	0.00524
gastrulation (GO:0007369)	173	18	6.29	+	2.86	6.2e-05	0.00401
positive regulation of epithelial cell proliferation (GO:0050679)	202	21	7.34	+	2.86	1.58e-05	0.00121
cellular response to transforming growth factor beta stimulus (GO:0071560)	154	16	5.6	+	2.86	0.000159	0.00849
biomineral tissue development (GO:0031214)	106	11	3.85	+	2.86	0.00164	0.048
female sex differentiation (GO:0046660)	116	12	4.22	+	2.85	0.00106	0.0347
positive regulation of chemotaxis (GO:0050921)	145	15	5.27	+	2.85	0.000264	0.0129
negative regulation of Wnt signaling pathway (GO:0030178)	174	18	6.32	+	2.85	6.68e-05	0.00425
regulation of lipid transport (GO:0032368)	136	14	4.94	+	2.83	0.00044	0.0187
osteoblast differentiation (GO:0001649)	146	15	5.31	+	2.83	0.000285	0.0133
limb morphogenesis (GO:0035108)	156	16	5.67	+	2.82	0.000184	0.00952
appendage morphogenesis (GO:0035107)	156	16	5.67	+	2.82	0.000184	0.00949
response to toxic substance (GO:0009636)	255	26	9.27	+	2.81	2.3e-06	0.000244
vascular process in circulatory system (GO:0003018)	275	28	10	+	2.8	9.74e-07	0.000121
male gonad development (GO:0008584)	148	15	5.38	+	2.79	0.00033	0.0148
mesenchyme development (GO:0060485)	248	25	9.01	+	2.77	4.4e-06	0.00042
development of primary male sexual characteristics (GO:0046546)	149	15	5.42	+	2.77	0.000355	0.0157
epithelial cell development (GO:0002064)	199	20	7.23	+	2.77	4.07e-05	0.00273
regulation of muscle contraction (GO:0006937)	170	17	6.18	+	2.75	0.00016	0.00852
negative regulation of neuron projection development (GO:0010977)	130	13	4.72	+	2.75	0.000915	0.0315
regulation of cell shape (GO:0008360)	140	14	5.09	+	2.75	0.00059	0.0228
regulation of lipid localization (GO:1905952)	161	16	5.85	+	2.73	0.000265	0.0129
ameboidal-type cell migration (GO:0001667)	141	14	5.12	+	2.73	0.000634	0.0241
regulation of vasculature development (GO:1901342)	303	30	11.01	+	2.72	7.29e-07	9.39e-05
axon guidance (GO:0007411)	233	23	8.47	+	2.72	1.48e-05	0.00114
regulation of body fluid levels (GO:0050878)	366	36	13.3	+	2.71	6.78e-08	1.23e-05
neuron projection guidance (GO:0097485)	234	23	8.5	+	2.7	1.59e-05	0.00121
ossification (GO:0001503)	285	28	10.36	+	2.7	1.98e-06	0.000219
positive regulation of neuron projection development (GO:0010976)	153	15	5.56	+	2.7	0.000471	0.0194
regulation of angiogenesis (GO:0045765)	296	29	10.76	+	2.7	1.38e-06	0.000161
limb development (GO:0060173)	194	19	7.05	+	2.69	8.91e-05	0.00526
appendage development (GO:0048736)	194	19	7.05	+	2.69	8.91e-05	0.00524
cardiac chamber morphogenesis (GO:0003206)	133	13	4.83	+	2.69	0.00113	0.0366
positive regulation of cell migration (GO:0030335)	553	54	20.1	+	2.69	4.44e-11	1.73e-08
tube morphogenesis (GO:0035239)	700	68	25.44	+	2.67	1.49e-13	8.18e-11
membrane lipid biosynthetic process (GO:0046467)	145	14	5.27	+	2.66	0.000837	0.0301
circulatory system process (GO:0003013)	522	50	18.97	+	2.64	4.66e-10	1.5e-07
response to decreased oxygen levels (GO:0036293)	303	29	11.01	+	2.63	2.21e-06	0.000239
female pregnancy (GO:0007565)	178	17	6.47	+	2.63	0.000278	0.0131
regulation of blood pressure (GO:0008217)	199	19	7.23	+	2.63	0.000125	0.00688
modified amino acid metabolic process (GO:0006575)	179	17	6.51	+	2.61	0.000297	0.0138
amide metabolic process (GO:0043603)	412	39	14.97	+	2.6	5.42e-08	1.06e-05
response to calcium ion (GO:0051592)	138	13	5.02	+	2.59	0.00159	0.0466
leukocyte proliferation (GO:0070661)	138	13	5.02	+	2.59	0.00159	0.0465
neuron migration (GO:0001764)	149	14	5.42	+	2.59	0.00109	0.0357
negative regulation of cell migration (GO:0030336)	298	28	10.83	+	2.59	4.7e-06	0.000441
negative regulation of locomotion (GO:0040013)	330	31	11.99	+	2.58	1.48e-06	0.00017
male sex differentiation (GO:0046661)	171	16	6.22	+	2.57	0.000521	0.0207
digestive tract development (GO:0048565)	139	13	5.05	+	2.57	0.00169	0.0494
response to hypoxia (GO:0001666)	289	27	10.5	+	2.57	7.69e-06	0.00067
positive regulation of cell motility (GO:2000147)	579	54	21.04	+	2.57	2.46e-10	8.47e-08
regulation of cell migration (GO:0030334)	958	89	34.82	+	2.56	4.48e-16	4.75e-13
blood circulation (GO:0008015)	431	40	15.67	+	2.55	6.27e-08	1.16e-05
negative regulation of cell motility (GO:2000146)	313	29	11.38	+	2.55	4.21e-06	0.00041
positive regulation of locomotion (GO:0040017)	595	55	21.63	+	2.54	2.32e-10	8.2e-08
biological process involved in interaction with host (GO:0051701)	152	14	5.52	+	2.53	0.00132	0.0406
regulation of muscle system process (GO:0090257)	239	22	8.69	+	2.53	6.53e-05	0.00419
multi-multicellular organism process (GO:0044706)	207	19	7.52	+	2.53	0.000209	0.0106
digestive system development (GO:0055123)	153	14	5.56	+	2.52	0.00141	0.0429
renal system development (GO:0072001)	317	29	11.52	+	2.52	5.4e-06	0.000497
cardiac chamber development (GO:0003205)	175	16	6.36	+	2.52	0.000671	0.0253
multi-organism reproductive process (GO:0044703)	197	18	7.16	+	2.51	0.000321	0.0146
membrane lipid metabolic process (GO:0006643)	208	19	7.56	+	2.51	0.000222	0.0112
neuron projection morphogenesis (GO:0048812)	504	46	18.32	+	2.51	1.69e-08	3.79e-06
cell projection morphogenesis (GO:0048858)	516	47	18.75	+	2.51	1.18e-08	2.82e-06
response to oxygen levels (GO:0070482)	330	30	11.99	+	2.5	4.23e-06	0.00041
regulation of cell motility (GO:2000145)	1017	92	36.96	+	2.49	4.63e-16	4.57e-13
tube development (GO:0035295)	929	84	33.77	+	2.49	1.05e-14	8.16e-12
plasma membrane bounded cell projection morphogenesis (GO:0120039)	509	46	18.5	+	2.49	1.96e-08	4.27e-06
amide biosynthetic process (GO:0043604)	155	14	5.63	+	2.49	0.0016	0.0467
axonogenesis (GO:0007409)	378	34	13.74	+	2.47	1.98e-06	0.000218
blood vessel diameter maintenance (GO:0097746)	156	14	5.67	+	2.47	0.0017	0.0494
regulation of tube diameter (GO:0035296)	156	14	5.67	+	2.47	0.0017	0.0493
circulatory system development (GO:0072359)	950	85	34.53	+	2.46	1.26e-14	9.35e-12
positive regulation of phosphatidylinositol 3-kinase/protein kinase B signal transduction (GO:0051897)	202	18	7.34	+	2.45	0.000435	0.0185
glycoprotein biosynthetic process (GO:0009101)	281	25	10.21	+	2.45	3.76e-05	0.00256
growth (GO:0040007)	462	41	16.79	+	2.44	1.76e-07	2.81e-05
developmental growth (GO:0048589)	462	41	16.79	+	2.44	1.76e-07	2.78e-05
kidney development (GO:0001822)	306	27	11.12	+	2.43	3.26e-05	0.00226
cell surface receptor protein serine/threonine kinase signaling pathway (GO:0007178)	193	17	7.01	+	2.42	0.000707	0.0264
positive regulation of ERK1 and ERK2 cascade (GO:0070374)	193	17	7.01	+	2.42	0.000707	0.0263
regulation of locomotion (GO:0040012)	1059	93	38.49	+	2.42	2.07e-15	1.7e-12
regulation of chemotaxis (GO:0050920)	207	18	7.52	+	2.39	0.000582	0.0227
regulation of neuron projection development (GO:0010975)	439	38	15.96	+	2.38	8.48e-07	0.000106
enzyme-linked receptor protein signaling pathway (GO:0007167)	636	55	23.12	+	2.38	3.69e-09	1.01e-06
glycoprotein metabolic process (GO:0009100)	348	30	12.65	+	2.37	1.43e-05	0.00111
gonad development (GO:0008406)	232	20	8.43	+	2.37	0.000508	0.0203
cell morphogenesis (GO:0000902)	724	62	26.31	+	2.36	4.03e-10	1.33e-07
response to ketone (GO:1901654)	222	19	8.07	+	2.35	0.000762	0.0281
regulation of cell junction assembly (GO:1901888)	269	23	9.78	+	2.35	0.000182	0.00945
regulation of epithelial cell proliferation (GO:0050678)	363	31	13.19	+	2.35	1.18e-05	0.000952
regulation of heart contraction (GO:0008016)	211	18	7.67	+	2.35	0.00112	0.0362
cell morphogenesis involved in neuron differentiation (GO:0048667)	461	39	16.76	+	2.33	1.58e-06	0.000179
development of primary sexual characteristics (GO:0045137)	237	20	8.61	+	2.32	0.000583	0.0227
response to endoplasmic reticulum stress (GO:0034976)	237	20	8.61	+	2.32	0.000583	0.0226
reproductive system development (GO:0061458)	310	26	11.27	+	2.31	8.11e-05	0.00488
skin development (GO:0043588)	287	24	10.43	+	2.3	0.000163	0.00861
cellular response to chemical stress (GO:0062197)	287	24	10.43	+	2.3	0.000163	0.00858
cell surface receptor protein tyrosine kinase signaling pathway (GO:0007169)	432	36	15.7	+	2.29	5.3e-06	0.000491
inorganic ion homeostasis (GO:0098771)	444	37	16.14	+	2.29	3.75e-06	0.000373
alcohol metabolic process (GO:0006066)	313	26	11.38	+	2.29	9.24e-05	0.00539
actin filament organization (GO:0007015)	277	23	10.07	+	2.28	0.000245	0.0122
axon development (GO:0061564)	434	36	15.77	+	2.28	5.58e-06	0.000507
cell adhesion (GO:0007155)	965	80	35.07	+	2.28	5.56e-12	2.35e-09
sulfur compound metabolic process (GO:0006790)	314	26	11.41	+	2.28	9.66e-05	0.00559
regulation of Wnt signaling pathway (GO:0030111)	339	28	12.32	+	2.27	5.34e-05	0.0035
reproductive structure development (GO:0048608)	305	25	11.09	+	2.26	0.000152	0.0082
regulation of cell morphogenesis (GO:0022604)	245	20	8.9	+	2.25	0.000773	0.0282
gliogenesis (GO:0042063)	282	23	10.25	+	2.24	0.000302	0.014
muscle tissue development (GO:0060537)	356	29	12.94	+	2.24	7.22e-05	0.00444
regulation of cell adhesion (GO:0030155)	801	65	29.11	+	2.23	1.62e-09	4.8e-07
muscle system process (GO:0003012)	296	24	10.76	+	2.23	0.000239	0.0119
regulation of actin filament-based process (GO:0032970)	396	32	14.39	+	2.22	2.91e-05	0.00207
supramolecular fiber organization (GO:0097435)	609	49	22.13	+	2.21	2.2e-07	3.33e-05
cellular response to oxidative stress (GO:0034599)	225	18	8.18	+	2.2	0.00175	0.0497
regulation of anatomical structure morphogenesis (GO:0022603)	838	67	30.46	+	2.2	1.34e-09	4.13e-07
skeletal system development (GO:0001501)	514	41	18.68	+	2.19	3.26e-06	0.000331
cellular response to growth factor stimulus (GO:0071363)	478	38	17.37	+	2.19	9.06e-06	0.000763
response to alcohol (GO:0097305)	265	21	9.63	+	2.18	0.000777	0.0283
response to growth factor (GO:0070848)	509	40	18.5	+	2.16	5.55e-06	0.000507
positive regulation of cell adhesion (GO:0045785)	499	39	18.14	+	2.15	8.2e-06	0.000702
regulation of system process (GO:0044057)	563	44	20.46	+	2.15	1.89e-06	0.00021
response to oxidative stress (GO:0006979)	372	29	13.52	+	2.14	0.000118	0.00663
regulation of small GTPase mediated signal transduction (GO:0051056)	310	24	11.27	+	2.13	0.000562	0.022
regulation of ERK1 and ERK2 cascade (GO:0070372)	285	22	10.36	+	2.12	0.00107	0.035
sex differentiation (GO:0007548)	286	22	10.39	+	2.12	0.00109	0.0356
anatomical structure formation involved in morphogenesis (GO:0048646)	991	75	36.02	+	2.08	1.65e-09	4.8e-07
response to steroid hormone (GO:0048545)	279	21	10.14	+	2.07	0.00174	0.0497
anatomical structure morphogenesis (GO:0009653)	2270	170	82.51	+	2.06	1.35e-20	3.34e-17
regulation of endocytosis (GO:0030100)	308	23	11.19	+	2.05	0.00107	0.035
cell-cell adhesion (GO:0098609)	550	41	19.99	+	2.05	1.41e-05	0.0011
neuron projection development (GO:0031175)	725	54	26.35	+	2.05	7.6e-07	9.62e-05
striated muscle tissue development (GO:0014706)	337	25	12.25	+	2.04	0.000966	0.0325
tissue morphogenesis (GO:0048729)	580	43	21.08	+	2.04	1.29e-05	0.00101
muscle organ development (GO:0007517)	324	24	11.78	+	2.04	0.00133	0.0405
cellular homeostasis (GO:0019725)	690	51	25.08	+	2.03	2.08e-06	0.000226
regulation of actin cytoskeleton organization (GO:0032956)	352	26	12.79	+	2.03	0.000737	0.0272
carbohydrate derivative biosynthetic process (GO:1901137)	556	41	20.21	+	2.03	2.49e-05	0.00181
negative regulation of response to external stimulus (GO:0032102)	394	29	14.32	+	2.03	0.000328	0.0148
cell migration (GO:0016477)	941	69	34.2	+	2.02	3.08e-08	6.17e-06
response to metal ion (GO:0010038)	348	25	12.65	+	1.98	0.00124	0.0394
negative regulation of cellular component organization (GO:0051129)	699	50	25.41	+	1.97	6.9e-06	0.000605
negative regulation of multicellular organismal process (GO:0051241)	1136	80	41.29	+	1.94	1.19e-08	2.8e-06
response to xenobiotic stimulus (GO:0009410)	426	30	15.48	+	1.94	0.000564	0.022
carbohydrate derivative metabolic process (GO:1901135)	895	63	32.53	+	1.94	5.55e-07	7.54e-05
neuron development (GO:0048666)	898	63	32.64	+	1.93	5.94e-07	7.93e-05
carbohydrate metabolic process (GO:0005975)	442	31	16.06	+	1.93	0.000462	0.0194
neurogenesis (GO:0022008)	1413	99	51.36	+	1.93	2.22e-10	8.01e-08
muscle structure development (GO:0061061)	530	37	19.26	+	1.92	0.000145	0.00786
negative regulation of developmental process (GO:0051093)	934	65	33.95	+	1.91	5.85e-07	7.88e-05
regulation of transmembrane transport (GO:0034762)	417	29	15.16	+	1.91	0.00083	0.03
tissue development (GO:0009888)	1800	125	65.42	+	1.91	1.26e-12	5.64e-10
modulation of chemical synaptic transmission (GO:0050804)	505	35	18.35	+	1.91	0.000261	0.0128
regulation of trans-synaptic signaling (GO:0099177)	506	35	18.39	+	1.9	0.000267	0.013
monoatomic ion homeostasis (GO:0050801)	523	36	19.01	+	1.89	0.00031	0.0141
chemical homeostasis (GO:0048878)	917	63	33.33	+	1.89	1.25e-06	0.000149
small molecule biosynthetic process (GO:0044283)	466	32	16.94	+	1.89	0.000608	0.0234
monoatomic cation homeostasis (GO:0055080)	512	35	18.61	+	1.88	0.000429	0.0184
cell junction organization (GO:0034330)	571	39	20.75	+	1.88	0.000157	0.00844
actin filament-based process (GO:0030029)	617	42	22.43	+	1.87	0.000107	0.00609
system development (GO:0048731)	3629	247	131.9	+	1.87	3.9e-25	5.77e-21
plasma membrane bounded cell projection organization (GO:0120036)	1194	81	43.4	+	1.87	6.24e-08	1.17e-05
regulation of multicellular organismal development (GO:2000026)	1405	95	51.07	+	1.86	3.56e-09	1.01e-06
regulation of plasma membrane bounded cell projection organization (GO:0120035)	637	43	23.15	+	1.86	9.39e-05	0.00545
cell projection organization (GO:0030030)	1248	83	45.36	+	1.83	8.21e-08	1.43e-05
intracellular chemical homeostasis (GO:0055082)	573	38	20.83	+	1.82	0.000383	0.0165
animal organ morphogenesis (GO:0009887)	986	65	35.84	+	1.81	4.43e-06	0.000418
regulation of hormone levels (GO:0010817)	562	37	20.43	+	1.81	0.000525	0.0207
generation of neurons (GO:0048699)	1218	80	44.27	+	1.81	3.17e-07	4.56e-05
regulation of cell projection organization (GO:0031344)	655	43	23.81	+	1.81	0.00018	0.00938
cell population proliferation (GO:0008283)	747	49	27.15	+	1.8	8.42e-05	0.00501
cellular response to chemical stimulus (GO:0070887)	1959	128	71.2	+	1.8	3.83e-11	1.53e-08
response to hormone (GO:0009725)	797	52	28.97	+	1.8	4.37e-05	0.00291
response to abiotic stimulus (GO:0009628)	1135	74	41.25	+	1.79	1.12e-06	0.000137
cellular response to endogenous stimulus (GO:0071495)	936	61	34.02	+	1.79	9.8e-06	0.000815
metal ion transport (GO:0030001)	660	43	23.99	+	1.79	0.000274	0.013
negative regulation of signal transduction (GO:0009968)	1384	90	50.3	+	1.79	6.35e-08	1.16e-05
negative regulation of programmed cell death (GO:0043069)	923	60	33.55	+	1.79	1.29e-05	0.00101
multicellular organism development (GO:0007275)	4029	261	146.44	+	1.78	1.34e-23	9.96e-20
regulation of programmed cell death (GO:0043067)	1513	98	54.99	+	1.78	1.85e-08	4.1e-06
response to endogenous stimulus (GO:0009719)	1205	78	43.8	+	1.78	6.73e-07	8.82e-05
negative regulation of response to stimulus (GO:0048585)	1732	112	62.95	+	1.78	1.59e-09	4.79e-07
actin cytoskeleton organization (GO:0030036)	543	35	19.74	+	1.77	0.00104	0.0341
import into cell (GO:0098657)	701	45	25.48	+	1.77	0.000277	0.0131
neuron differentiation (GO:0030182)	1138	73	41.36	+	1.76	2.65e-06	0.000274
negative regulation of cell population proliferation (GO:0008285)	703	45	25.55	+	1.76	0.000283	0.0133
intracellular signaling cassette (GO:0141124)	847	54	30.79	+	1.75	6.88e-05	0.00434
homeostatic process (GO:0042592)	1493	95	54.26	+	1.75	7.95e-08	1.4e-05
nucleoside phosphate metabolic process (GO:0006753)	582	37	21.15	+	1.75	0.00101	0.0334
negative regulation of cell differentiation (GO:0045596)	677	43	24.61	+	1.75	0.000493	0.0199
small molecule metabolic process (GO:0044281)	1576	100	57.28	+	1.75	3.55e-08	7.01e-06
positive regulation of intracellular signal transduction (GO:1902533)	1135	72	41.25	+	1.75	3.99e-06	0.000391
positive regulation of cell differentiation (GO:0045597)	869	55	31.58	+	1.74	6.07e-05	0.00395
response to oxygen-containing compound (GO:1901700)	1550	98	56.34	+	1.74	6.16e-08	1.17e-05
animal organ development (GO:0048513)	2904	183	105.55	+	1.73	1.56e-14	1.05e-11
positive regulation of signaling (GO:0023056)	1797	113	65.31	+	1.73	6.77e-09	1.76e-06
negative regulation of cell communication (GO:0010648)	1480	93	53.79	+	1.73	2.33e-07	3.42e-05
lipid biosynthetic process (GO:0008610)	589	37	21.41	+	1.73	0.00156	0.0463
regulation of apoptotic process (GO:0042981)	1465	92	53.25	+	1.73	2.18e-07	3.32e-05
negative regulation of signaling (GO:0023057)	1481	93	53.83	+	1.73	2.35e-07	3.41e-05
regulation of MAPK cascade (GO:0043408)	654	41	23.77	+	1.72	0.000878	0.031
positive regulation of developmental process (GO:0051094)	1328	83	48.27	+	1.72	1.41e-06	0.000163
organophosphate metabolic process (GO:0019637)	977	61	35.51	+	1.72	4.72e-05	0.00312
epithelial cell differentiation (GO:0030855)	657	41	23.88	+	1.72	0.000902	0.0312
nucleobase-containing small molecule metabolic process (GO:0055086)	609	38	22.13	+	1.72	0.00129	0.0406
positive regulation of cell population proliferation (GO:0008284)	930	58	33.8	+	1.72	6.78e-05	0.00429
nervous system development (GO:0007399)	2279	142	82.83	+	1.71	9.33e-11	3.45e-08
positive regulation of signal transduction (GO:0009967)	1605	100	58.34	+	1.71	9.85e-08	1.68e-05
cell motility (GO:0048870)	1172	73	42.6	+	1.71	8.07e-06	0.000695
positive regulation of multicellular organismal process (GO:0051240)	1661	103	60.37	+	1.71	7.38e-08	1.32e-05
negative regulation of apoptotic process (GO:0043066)	888	55	32.28	+	1.7	0.000108	0.00614
regulation of signal transduction (GO:0009966)	3101	192	112.71	+	1.7	1.56e-14	1.1e-11
regulation of multicellular organismal process (GO:0051239)	2972	184	108.02	+	1.7	6.77e-14	4.18e-11
positive regulation of cell communication (GO:0010647)	1795	111	65.24	+	1.7	2.26e-08	4.71e-06
regulation of signaling (GO:0023051)	3541	218	128.7	+	1.69	1.83e-16	2.47e-13
regulation of developmental process (GO:0050793)	2457	151	89.3	+	1.69	5.51e-11	2.09e-08
regulation of cell communication (GO:0010646)	3546	216	128.88	+	1.68	9.91e-16	9.18e-13
response to lipid (GO:0033993)	855	52	31.08	+	1.67	0.000344	0.0153
regulation of cell differentiation (GO:0045595)	1563	95	56.81	+	1.67	6.91e-07	8.98e-05
regulation of transport (GO:0051049)	1599	97	58.12	+	1.67	6.24e-07	8.26e-05
lipid metabolic process (GO:0006629)	1211	73	44.01	+	1.66	2.33e-05	0.00173
regulation of cell population proliferation (GO:0042127)	1659	100	60.3	+	1.66	4.78e-07	6.62e-05
cellular response to oxygen-containing compound (GO:1901701)	1063	64	38.64	+	1.66	6.94e-05	0.00435
intracellular signal transduction (GO:0035556)	1778	107	64.62	+	1.66	1.86e-07	2.9e-05
central nervous system development (GO:0007417)	1040	62	37.8	+	1.64	0.00012	0.00671
epithelium development (GO:0060429)	1129	67	41.03	+	1.63	7.7e-05	0.00466
cell development (GO:0048468)	2307	136	83.85	+	1.62	1.11e-08	2.69e-06
response to nitrogen compound (GO:1901698)	1001	59	36.38	+	1.62	0.000253	0.0125
regulation of intracellular signal transduction (GO:1902531)	2005	118	72.87	+	1.62	1.49e-07	2.39e-05
cell activation (GO:0001775)	765	45	27.8	+	1.62	0.00152	0.0451
positive regulation of transport (GO:0051050)	842	49	30.6	+	1.6	0.00128	0.0404
phosphate-containing compound metabolic process (GO:0006796)	1427	83	51.87	+	1.6	1.91e-05	0.00144
cell differentiation (GO:0030154)	3752	218	136.37	+	1.6	1.37e-13	8.13e-11
cellular developmental process (GO:0048869)	3755	218	136.48	+	1.6	1.4e-13	7.99e-11
phosphorus metabolic process (GO:0006793)	1430	83	51.97	+	1.6	2.61e-05	0.00188
anatomical structure development (GO:0048856)	5304	306	192.78	+	1.59	4.67e-20	9.88e-17
cell death (GO:0008219)	1112	64	40.42	+	1.58	0.000268	0.013
programmed cell death (GO:0012501)	1107	63	40.23	+	1.57	0.000482	0.0197
regulation of response to stimulus (GO:0048583)	4107	231	149.27	+	1.55	4.85e-13	2.48e-10
regulation of localization (GO:0032879)	2010	113	73.06	+	1.55	2.28e-06	0.000243
cellular response to stress (GO:0033554)	1648	92	59.9	+	1.54	3.48e-05	0.0024
apoptotic process (GO:0006915)	1068	59	38.82	+	1.52	0.00135	0.0412
developmental process (GO:0032502)	5830	321	211.9	+	1.51	4.12e-18	7.63e-15
regulation of biological quality (GO:0065008)	3003	165	109.15	+	1.51	2.52e-08	5.19e-06
response to stress (GO:0006950)	3539	194	128.63	+	1.51	9.99e-10	3.15e-07
negative regulation of biological process (GO:0048519)	5248	284	190.74	+	1.49	2.51e-14	1.62e-11
multicellular organismal process (GO:0032501)	6408	344	232.9	+	1.48	5.49e-18	9.04e-15
positive regulation of response to stimulus (GO:0048584)	2296	123	83.45	+	1.47	8.52e-06	0.000721
negative regulation of cellular process (GO:0048523)	5027	269	182.71	+	1.47	8.17e-13	3.78e-10
regulation of cellular component organization (GO:0051128)	2486	132	90.36	+	1.46	5.86e-06	0.00052
regulation of response to stress (GO:0080134)	1434	76	52.12	+	1.46	0.000946	0.0323
cell surface receptor signaling pathway (GO:0007166)	2124	111	77.2	+	1.44	8.38e-05	0.005
response to chemical (GO:0042221)	3714	191	134.99	+	1.41	1.98e-07	3.05e-05
positive regulation of biological process (GO:0048518)	6113	302	222.18	+	1.36	2.85e-10	9.61e-08
positive regulation of cellular process (GO:0048522)	5813	283	211.28	+	1.34	7.85e-09	1.97e-06
transport (GO:0006810)	3722	178	135.28	+	1.32	6.94e-05	0.00434
establishment of localization (GO:0051234)	4006	190	145.6	+	1.3	5.05e-05	0.00332
cellular response to stimulus (GO:0051716)	6478	307	235.45	+	1.3	2.22e-08	4.76e-06
signal transduction (GO:0007165)	4942	234	179.62	+	1.3	4.41e-06	0.000419
cell communication (GO:0007154)	5328	251	193.65	+	1.3	2.21e-06	0.000238
localization (GO:0051179)	4549	213	165.34	+	1.29	3.48e-05	0.00239
signaling (GO:0023052)	5282	247	191.98	+	1.29	4.81e-06	0.000448
cellular component organization (GO:0016043)	5717	265	207.79	+	1.28	3.7e-06	0.000371
response to stimulus (GO:0050896)	8280	378	300.94	+	1.26	7.01e-09	1.79e-06
cellular component organization or biogenesis (GO:0071840)	5931	267	215.57	+	1.24	3.78e-05	0.00256
regulation of cellular process (GO:0050794)	11417	490	414.96	+	1.18	1.4e-08	3.24e-06
regulation of biological process (GO:0050789)	11815	507	429.43	+	1.18	3.73e-09	1e-06
biological regulation (GO:0065007)	12219	521	444.11	+	1.17	3.67e-09	1.03e-06
metabolic process (GO:0008152)	7642	323	277.76	+	1.16	0.000594	0.0229
cellular process (GO:0009987)	15563	657	565.65	+	1.16	2.84e-17	4.21e-14
biological_process (GO:0008150)	17724	705	644.2	+	1.09	6.65e-13	3.18e-10
nucleic acid metabolic process (GO:0090304)	2178	42	79.16	-	0.53	1.53e-06	0.000174
nucleic acid biosynthetic process (GO:0141187)	1495	27	54.34	-	0.5	2.81e-05	0.00201
RNA biosynthetic process (GO:0032774)	1406	23	51.1	-	0.45	8.01e-06	0.000694
RNA metabolic process (GO:0016070)	1556	25	56.55	-	0.44	1.38e-06	0.000162
Unclassified (UNCLASSIFIED)	2856	43	103.8	-	0.41	6.65e-13	3.29e-10
sensory perception (GO:0007600)	1002	15	36.42	-	0.41	5.93e-05	0.00387
detection of stimulus (GO:0051606)	690	10	25.08	-	0.4	0.000835	0.0301
adaptive immune response (GO:0002250)	683	9	24.82	-	0.36	0.000355	0.0157
RNA processing (GO:0006396)	879	8	31.95	-	0.25	4.44e-07	6.27e-05
ribonucleoprotein complex biogenesis (GO:0022613)	453	4	16.46	-	0.24	0.000494	0.0199
mRNA processing (GO:0006397)	465	4	16.9	-	0.24	0.000358	0.0158
detection of chemical stimulus (GO:0009593)	523	4	19.01	-	0.21	4.52e-05	0.003
detection of stimulus involved in sensory perception (GO:0050906)	564	4	20.5	-	0.2	1.7e-05	0.00128
sensory perception of chemical stimulus (GO:0007606)	551	3	20.03	-	0.15	4.28e-06	0.000412
sensory perception of smell (GO:0007608)	472	2	17.16	-	0.12	8.27e-06	0.000704
regulation of mRNA metabolic process (GO:1903311)	309	1	11.23	-	0.09	0.000299	0.0138
protein-DNA complex assembly (GO:0065004)	203	0	7.38	-	< 0.01	0.000985	0.0329
rRNA processing (GO:0006364)	216	0	7.85	-	< 0.01	0.000681	0.0255
detection of chemical stimulus involved in sensory perception of smell (GO:0050911)	440	0	15.99	-	< 0.01	1.09e-07	1.83e-05
detection of chemical stimulus involved in sensory perception (GO:0050907)	487	0	17.7	-	< 0.01	2.25e-08	4.76e-06
regulation of mRNA catabolic process (GO:0061013)	195	0	7.09	-	< 0.01	0.0015	0.0446

## Sheet: GSF-F_down-regulated
Analysis Type:	PANTHER Overrepresentation Test (Released 20240807)
Annotation Version and Release Date:	GO Ontology database DOI: 10.5281/zenodo.15066566 Released 2025-03-16
Analyzed List:	Client Text Box Input (Homo sapiens)
Reference List:	Homo sapiens (all genes in database)
Test Type:	FISHER
Correction:	FDR
GO biological process complete	Homo sapiens - REFLIST (20580)	Client Text Box Input (770)	Client Text Box Input (expected)	Client Text Box Input (over/under)	Client Text Box Input (fold Enrichment)	Client Text Box Input (raw P-value)	Client Text Box Input (FDR)
protein deamination (GO:0018277)	2	2	0.07	+	26.73	0.0014	0.0417
positive regulation of platelet-derived growth factor production (GO:0090362)	2	2	0.07	+	26.73	0.0014	0.0416
positive regulation of ARF protein signal transduction (GO:0032014)	2	2	0.07	+	26.73	0.0014	0.0415
neurofibrillary tangle assembly (GO:1902988)	2	2	0.07	+	26.73	0.0014	0.0414
negative regulation of granulocyte chemotaxis (GO:0071623)	4	3	0.15	+	20.05	0.000203	0.00986
cellular response to jasmonic acid stimulus (GO:0071395)	4	3	0.15	+	20.05	0.000203	0.00982
negative regulation of neutrophil chemotaxis (GO:0090024)	4	3	0.15	+	20.05	0.000203	0.00979
response to jasmonic acid (GO:0009753)	4	3	0.15	+	20.05	0.000203	0.00976
long-chain fatty acid import across plasma membrane (GO:0015911)	4	3	0.15	+	20.05	0.000203	0.00973
negative regulation of neutrophil migration (GO:1902623)	5	3	0.19	+	16.04	0.000493	0.0195
polar body extrusion after meiotic divisions (GO:0040038)	5	3	0.19	+	16.04	0.000493	0.0195
maintenance of protein location in mitochondrion (GO:0072656)	5	3	0.19	+	16.04	0.000493	0.0194
cleavage furrow formation (GO:0036089)	7	4	0.26	+	15.27	6.22e-05	0.00385
response to heparin (GO:0071503)	6	3	0.22	+	13.36	0.000959	0.032
negative regulation of monocyte chemotaxis (GO:0090027)	6	3	0.22	+	13.36	0.000959	0.0319
positive regulation of focal adhesion disassembly (GO:0120183)	6	3	0.22	+	13.36	0.000959	0.0318
regulation of focal adhesion disassembly (GO:0120182)	6	3	0.22	+	13.36	0.000959	0.0318
determination of dorsal/ventral asymmetry (GO:0048262)	6	3	0.22	+	13.36	0.000959	0.0317
paranodal junction assembly (GO:0030913)	6	3	0.22	+	13.36	0.000959	0.0316
positive regulation of protein localization to cell cortex (GO:1904778)	6	3	0.22	+	13.36	0.000959	0.0316
negative regulation of extracellular matrix disassembly (GO:0010716)	6	3	0.22	+	13.36	0.000959	0.0315
late endosome to Golgi transport (GO:0034499)	6	3	0.22	+	13.36	0.000959	0.0314
ERBB2-ERBB3 signaling pathway (GO:0038133)	9	4	0.34	+	11.88	0.000211	0.00998
ERBB3 signaling pathway (GO:0038129)	9	4	0.34	+	11.88	0.000211	0.00994
negative regulation of myelination (GO:0031642)	9	4	0.34	+	11.88	0.000211	0.00991
plus-end-directed organelle transport along microtubule (GO:0072386)	7	3	0.26	+	11.45	0.00163	0.0471
inositol trisphosphate metabolic process (GO:0032957)	7	3	0.26	+	11.45	0.00163	0.047
interleukin-11-mediated signaling pathway (GO:0038154)	7	3	0.26	+	11.45	0.00163	0.0469
SMAD protein signal transduction (GO:0060395)	23	7	0.86	+	8.13	1.45e-05	0.00115
regulation of keratinocyte migration (GO:0051547)	14	4	0.52	+	7.64	0.00144	0.0425
progesterone metabolic process (GO:0042448)	14	4	0.52	+	7.64	0.00144	0.0425
T-helper 17 cell differentiation (GO:0072539)	14	4	0.52	+	7.64	0.00144	0.0424
negative regulation of nervous system process (GO:0031645)	18	5	0.67	+	7.42	0.000413	0.017
regulation of vesicle size (GO:0097494)	18	5	0.67	+	7.42	0.000413	0.017
positive regulation of cell migration involved in sprouting angiogenesis (GO:0090050)	23	6	0.86	+	6.97	0.000157	0.00815
regulation of early endosome to late endosome transport (GO:2000641)	20	5	0.75	+	6.68	0.000702	0.0254
clathrin coat assembly (GO:0048268)	20	5	0.75	+	6.68	0.000702	0.0253
fibroblast migration (GO:0010761)	20	5	0.75	+	6.68	0.000702	0.0253
negative regulation of leukocyte chemotaxis (GO:0002689)	20	5	0.75	+	6.68	0.000702	0.0252
negative regulation of hippo signaling (GO:0035331)	24	6	0.9	+	6.68	0.000203	0.00971
postsynaptic density organization (GO:0097106)	27	6	1.01	+	5.94	0.000406	0.0168
cellular response to fluid shear stress (GO:0071498)	32	7	1.2	+	5.85	0.000148	0.00776
ERBB2 signaling pathway (GO:0038128)	23	5	0.86	+	5.81	0.00139	0.0417
postsynapse assembly (GO:0099068)	23	5	0.86	+	5.81	0.00139	0.0416
cellular response to osmotic stress (GO:0071470)	51	11	1.91	+	5.76	2.27e-06	0.000227
regulation of membrane protein ectodomain proteolysis (GO:0051043)	28	6	1.05	+	5.73	0.0005	0.0196
focal adhesion assembly (GO:0048041)	28	6	1.05	+	5.73	0.0005	0.0196
positive regulation of SMAD protein signal transduction (GO:0060391)	42	9	1.57	+	5.73	2.02e-05	0.00151
positive regulation of collagen biosynthetic process (GO:0032967)	24	5	0.9	+	5.57	0.0017	0.0485
positive regulation of sprouting angiogenesis (GO:1903672)	24	5	0.9	+	5.57	0.0017	0.0484
negative regulation of Ras protein signal transduction (GO:0046580)	24	5	0.9	+	5.57	0.0017	0.0483
cellular response to fatty acid (GO:0071398)	40	8	1.5	+	5.35	9.83e-05	0.0056
regulation of cell migration involved in sprouting angiogenesis (GO:0090049)	40	8	1.5	+	5.35	9.83e-05	0.00558
negative regulation of small GTPase mediated signal transduction (GO:0051058)	65	13	2.43	+	5.35	6.92e-07	8.27e-05
response to fatty acid (GO:0070542)	61	12	2.28	+	5.26	2.23e-06	0.000225
negative regulation of leukocyte migration (GO:0002686)	51	10	1.91	+	5.24	1.61e-05	0.00126
regulation of SMAD protein signal transduction (GO:0060390)	67	13	2.51	+	5.19	9.98e-07	0.000112
protein targeting to lysosome (GO:0006622)	31	6	1.16	+	5.17	0.000889	0.0302
neuron projection regeneration (GO:0031102)	31	6	1.16	+	5.17	0.000889	0.0301
neuron recognition (GO:0008038)	47	9	1.76	+	5.12	5.21e-05	0.00339
response to fluid shear stress (GO:0034405)	42	8	1.57	+	5.09	0.000141	0.00745
regulation of neutrophil chemotaxis (GO:0090022)	32	6	1.2	+	5.01	0.00106	0.0341
postsynaptic specialization organization (GO:0099084)	32	6	1.2	+	5.01	0.00106	0.034
female meiotic nuclear division (GO:0007143)	43	8	1.61	+	4.97	0.000168	0.00861
positive regulation of nitric oxide biosynthetic process (GO:0045429)	38	7	1.42	+	4.92	0.000457	0.0185
negative regulation of striated muscle cell differentiation (GO:0051154)	38	7	1.42	+	4.92	0.000457	0.0184
epithelial cell differentiation involved in kidney development (GO:0035850)	38	7	1.42	+	4.92	0.000457	0.0184
positive regulation of heart growth (GO:0060421)	33	6	1.23	+	4.86	0.00125	0.0386
phosphatidylinositol phosphate biosynthetic process (GO:0046854)	56	10	2.1	+	4.77	3.79e-05	0.00254
negative regulation of osteoblast differentiation (GO:0045668)	51	9	1.91	+	4.72	0.000102	0.00575
cell-substrate junction assembly (GO:0007044)	40	7	1.5	+	4.68	0.000633	0.0233
cortical actin cytoskeleton organization (GO:0030866)	40	7	1.5	+	4.68	0.000633	0.0233
regulation of granulocyte chemotaxis (GO:0071622)	52	9	1.95	+	4.63	0.000119	0.00644
regulation of sodium ion transmembrane transport (GO:1902305)	41	7	1.53	+	4.56	0.000739	0.0263
regulation of protein localization to cell surface (GO:2000008)	41	7	1.53	+	4.56	0.000739	0.0262
positive regulation of nitric oxide metabolic process (GO:1904407)	41	7	1.53	+	4.56	0.000739	0.0261
regulation of collagen metabolic process (GO:0010712)	41	7	1.53	+	4.56	0.000739	0.0261
ovulation cycle process (GO:0022602)	47	8	1.76	+	4.55	0.000319	0.0138
regulation of nitric oxide biosynthetic process (GO:0045428)	59	10	2.21	+	4.53	6.05e-05	0.00378
regulation of filopodium assembly (GO:0051489)	48	8	1.8	+	4.45	0.000371	0.0155
regulation of hippo signaling (GO:0035330)	42	7	1.57	+	4.45	0.000859	0.0295
cell-substrate junction organization (GO:0150115)	42	7	1.57	+	4.45	0.000859	0.0294
positive regulation of receptor-mediated endocytosis (GO:0048260)	55	9	2.06	+	4.37	0.000186	0.00916
Schwann cell development (GO:0014044)	43	7	1.61	+	4.35	0.000993	0.0325
synaptic vesicle recycling (GO:0036465)	62	10	2.32	+	4.31	9.36e-05	0.00535
Golgi to plasma membrane transport (GO:0006893)	56	9	2.1	+	4.3	0.000215	0.0101
positive regulation of fibroblast proliferation (GO:0048146)	56	9	2.1	+	4.3	0.000215	0.01
cortical cytoskeleton organization (GO:0030865)	56	9	2.1	+	4.3	0.000215	0.00999
regulation of neutrophil migration (GO:1902622)	44	7	1.65	+	4.25	0.00114	0.0362
regulation of long-term synaptic potentiation (GO:1900271)	44	7	1.65	+	4.25	0.00114	0.0361
regulation of sprouting angiogenesis (GO:1903670)	44	7	1.65	+	4.25	0.00114	0.0361
regulation of nitric oxide metabolic process (GO:0080164)	63	10	2.36	+	4.24	0.000108	0.00606
membrane invagination (GO:0010324)	51	8	1.91	+	4.19	0.000567	0.0214
response to osmotic stress (GO:0006970)	77	12	2.88	+	4.17	2.72e-05	0.00194
ovulation cycle (GO:0042698)	65	10	2.43	+	4.11	0.000141	0.00745
cellular response to BMP stimulus (GO:0071773)	92	14	3.44	+	4.07	7.88e-06	0.000679
response to BMP (GO:0071772)	92	14	3.44	+	4.07	7.88e-06	0.000675
BMP signaling pathway (GO:0030509)	79	12	2.96	+	4.06	3.54e-05	0.00241
cell surface receptor protein serine/threonine kinase signaling pathway (GO:0007178)	193	29	7.22	+	4.02	1.74e-10	4.16e-08
regulation of heart growth (GO:0060420)	60	9	2.24	+	4.01	0.000366	0.0155
regulation of cardiac muscle tissue growth (GO:0055021)	54	8	2.02	+	3.96	0.000839	0.0289
ensheathment of neurons (GO:0007272)	129	19	4.83	+	3.94	3.34e-07	4.3e-05
axon ensheathment (GO:0008366)	129	19	4.83	+	3.94	3.34e-07	4.26e-05
regulation of epithelial cell migration (GO:0010632)	68	10	2.54	+	3.93	0.000207	0.00982
transforming growth factor beta receptor signaling pathway (GO:0007179)	103	15	3.85	+	3.89	6.57e-06	0.000576
response to axon injury (GO:0048678)	55	8	2.06	+	3.89	0.00095	0.032
pyridine-containing compound catabolic process (GO:0072526)	55	8	2.06	+	3.89	0.00095	0.0319
regulation of cell-substrate junction organization (GO:0150116)	69	10	2.58	+	3.87	0.000234	0.0107
transforming growth factor beta receptor superfamily signaling pathway (GO:0141091)	180	26	6.73	+	3.86	3.61e-09	6.85e-07
positive regulation of blood vessel endothelial cell migration (GO:0043536)	56	8	2.1	+	3.82	0.00107	0.0343
positive regulation of protein localization to cell periphery (GO:1904377)	77	11	2.88	+	3.82	0.000132	0.00702
protein localization to synapse (GO:0035418)	63	9	2.36	+	3.82	0.000531	0.0203
regulation of smooth muscle cell migration (GO:0014910)	63	9	2.36	+	3.82	0.000531	0.0203
myelination (GO:0042552)	127	18	4.75	+	3.79	1.21e-06	0.000133
response to estrogen (GO:0043627)	64	9	2.39	+	3.76	0.000598	0.0224
negative regulation of muscle cell differentiation (GO:0051148)	64	9	2.39	+	3.76	0.000598	0.0223
ribonucleoside diphosphate catabolic process (GO:0009191)	57	8	2.13	+	3.75	0.00121	0.0374
ADP metabolic process (GO:0046031)	58	8	2.17	+	3.69	0.00136	0.0411
long-term synaptic potentiation (GO:0060291)	58	8	2.17	+	3.69	0.00136	0.041
presynaptic endocytosis (GO:0140238)	58	8	2.17	+	3.69	0.00136	0.0409
nucleoside diphosphate catabolic process (GO:0009134)	59	8	2.21	+	3.62	0.00152	0.0442
vesicle-mediated transport to the plasma membrane (GO:0098876)	133	18	4.98	+	3.62	2.38e-06	0.000237
regulation of organ growth (GO:0046620)	89	12	3.33	+	3.6	0.000117	0.00636
negative regulation of cell-substrate adhesion (GO:0010812)	60	8	2.24	+	3.56	0.0017	0.0484
regulation of miRNA transcription (GO:1902893)	75	10	2.81	+	3.56	0.000466	0.0187
positive regulation of JNK cascade (GO:0046330)	98	13	3.67	+	3.55	7.28e-05	0.00437
regulation of receptor internalization (GO:0002090)	76	10	2.84	+	3.52	0.000519	0.02
cellular response to interleukin-1 (GO:0071347)	76	10	2.84	+	3.52	0.000519	0.0199
regulation of receptor-mediated endocytosis (GO:0048259)	122	16	4.56	+	3.51	1.29e-05	0.00104
regulation of JNK cascade (GO:0046328)	145	19	5.43	+	3.5	2.06e-06	0.000212
regulation of fibroblast proliferation (GO:0048145)	92	12	3.44	+	3.49	0.000161	0.00832
response to transforming growth factor beta (GO:0071559)	161	21	6.02	+	3.49	6.54e-07	7.88e-05
regulation of leukocyte chemotaxis (GO:0002688)	123	16	4.6	+	3.48	1.43e-05	0.00114
cellular response to transforming growth factor beta stimulus (GO:0071560)	154	20	5.76	+	3.47	1.29e-06	0.000141
positive regulation of axonogenesis (GO:0050772)	77	10	2.88	+	3.47	0.000577	0.0217
memory (GO:0007613)	131	17	4.9	+	3.47	8.03e-06	0.000683
astrocyte differentiation (GO:0048708)	70	9	2.62	+	3.44	0.00116	0.0363
cytoskeleton-dependent cytokinesis (GO:0061640)	117	15	4.38	+	3.43	3.13e-05	0.00217
regulation of osteoblast differentiation (GO:0045667)	133	17	4.98	+	3.42	9.85e-06	0.000811
cytokinesis (GO:0000910)	119	15	4.45	+	3.37	3.83e-05	0.00255
ERBB signaling pathway (GO:0038127)	72	9	2.69	+	3.34	0.00142	0.0419
positive regulation of chemotaxis (GO:0050921)	145	18	5.43	+	3.32	8.23e-06	0.000693
female gonad development (GO:0008585)	97	12	3.63	+	3.31	0.000267	0.0119
regulation of nervous system process (GO:0031644)	123	15	4.6	+	3.26	5.65e-05	0.00358
autophagy of mitochondrion (GO:0000422)	74	9	2.77	+	3.25	0.00172	0.0487
gland morphogenesis (GO:0022612)	108	13	4.04	+	3.22	0.000198	0.00969
protein localization to cell junction (GO:1902414)	92	11	3.44	+	3.2	0.000638	0.0234
regulation of striated muscle cell differentiation (GO:0051153)	84	10	3.14	+	3.18	0.00115	0.0362
development of primary female sexual characteristics (GO:0046545)	101	12	3.78	+	3.18	0.00039	0.0162
regulation of protein localization to plasma membrane (GO:1903076)	118	14	4.41	+	3.17	0.000133	0.00708
endoderm development (GO:0007492)	85	10	3.18	+	3.14	0.00126	0.0387
regulation of cytokinesis (GO:0032465)	94	11	3.52	+	3.13	0.000766	0.0268
regulation of blood vessel endothelial cell migration (GO:0043535)	94	11	3.52	+	3.13	0.000766	0.0268
regulation of epithelial to mesenchymal transition (GO:0010717)	103	12	3.85	+	3.11	0.000467	0.0187
regulation of miRNA metabolic process (GO:2000628)	86	10	3.22	+	3.11	0.00138	0.0415
regulation of protein localization to cell periphery (GO:1904375)	155	18	5.8	+	3.1	2.08e-05	0.00155
peripheral nervous system development (GO:0007422)	87	10	3.26	+	3.07	0.00151	0.0441
organelle transport along microtubule (GO:0072384)	87	10	3.26	+	3.07	0.00151	0.044
negative regulation of protein localization (GO:1903828)	218	25	8.16	+	3.07	6.96e-07	8.25e-05
regulation of interleukin-1 beta production (GO:0032651)	96	11	3.59	+	3.06	0.000915	0.031
positive regulation of organelle assembly (GO:1902117)	88	10	3.29	+	3.04	0.00164	0.0472
central nervous system neuron development (GO:0021954)	97	11	3.63	+	3.03	0.000998	0.0326
positive regulation of leukocyte chemotaxis (GO:0002690)	97	11	3.63	+	3.03	0.000998	0.0325
positive regulation of transmembrane receptor protein serine/threonine kinase signaling pathway (GO:0090100)	106	12	3.97	+	3.03	0.000607	0.0226
negative regulation of cellular response to growth factor stimulus (GO:0090288)	107	12	4	+	3	0.000661	0.0242
regulation of chemotaxis (GO:0050920)	207	23	7.74	+	2.97	3.31e-06	0.000317
regulation of leukocyte migration (GO:0002685)	227	25	8.49	+	2.94	1.48e-06	0.000158
positive regulation of synaptic transmission (GO:0050806)	146	16	5.46	+	2.93	0.000118	0.00641
response to interleukin-1 (GO:0070555)	101	11	3.78	+	2.91	0.00139	0.0416
regulation of synaptic plasticity (GO:0048167)	212	23	7.93	+	2.9	4.96e-06	0.000446
odontogenesis (GO:0042476)	120	13	4.49	+	2.9	0.00056	0.0212
kidney epithelium development (GO:0072073)	139	15	5.2	+	2.88	0.000226	0.0105
negative regulation of cell migration (GO:0030336)	298	32	11.15	+	2.87	9.35e-08	1.43e-05
negative regulation of phosphorylation (GO:0042326)	131	14	4.9	+	2.86	0.000401	0.0166
positive regulation of cell migration (GO:0030335)	553	59	20.69	+	2.85	4.33e-13	1.94e-10
regulation of small GTPase mediated signal transduction (GO:0051056)	310	33	11.6	+	2.85	7.26e-08	1.14e-05
cell recognition (GO:0008037)	141	15	5.28	+	2.84	0.000265	0.0119
positive regulation of locomotion (GO:0040017)	595	63	22.26	+	2.83	9.45e-14	4.52e-11
negative regulation of cell motility (GO:2000146)	313	33	11.71	+	2.82	9.13e-08	1.41e-05
enzyme-linked receptor protein signaling pathway (GO:0007167)	636	67	23.8	+	2.82	1.89e-14	1.08e-11
fat cell differentiation (GO:0045444)	133	14	4.98	+	2.81	0.000468	0.0186
negative regulation of transmembrane receptor protein serine/threonine kinase signaling pathway (GO:0090101)	153	16	5.72	+	2.8	0.000204	0.00973
phosphatidylinositol biosynthetic process (GO:0006661)	115	12	4.3	+	2.79	0.00125	0.0386
regulation of mononuclear cell migration (GO:0071675)	145	15	5.43	+	2.76	0.000359	0.0153
neuron apoptotic process (GO:0051402)	116	12	4.34	+	2.76	0.00135	0.0412
female sex differentiation (GO:0046660)	116	12	4.34	+	2.76	0.00135	0.0411
osteoblast differentiation (GO:0001649)	146	15	5.46	+	2.75	0.000387	0.0161
cell-substrate adhesion (GO:0031589)	185	19	6.92	+	2.74	6.88e-05	0.00419
cellular response to growth factor stimulus (GO:0071363)	478	49	17.88	+	2.74	1.82e-10	4.22e-08
cell-matrix adhesion (GO:0007160)	137	14	5.13	+	2.73	0.000631	0.0233
response to growth factor (GO:0070848)	509	52	19.04	+	2.73	5.63e-11	1.52e-08
positive regulation of cell motility (GO:2000147)	579	59	21.66	+	2.72	3.02e-12	1.04e-09
negative regulation of protein phosphorylation (GO:0001933)	119	12	4.45	+	2.7	0.00169	0.0482
MAPK cascade (GO:0000165)	219	22	8.19	+	2.68	2.67e-05	0.00191
regulation of cell migration (GO:0030334)	958	96	35.84	+	2.68	7.27e-19	3.59e-15
negative regulation of locomotion (GO:0040013)	330	33	12.35	+	2.67	3.14e-07	4.16e-05
regeneration (GO:0031099)	150	15	5.61	+	2.67	0.000516	0.02
regulation of cell shape (GO:0008360)	140	14	5.24	+	2.67	0.000783	0.0272
protein localization to cell periphery (GO:1990778)	241	24	9.02	+	2.66	1.35e-05	0.00109
positive regulation of endocytosis (GO:0045807)	161	16	6.02	+	2.66	0.000365	0.0155
positive regulation of phosphatidylinositol 3-kinase/protein kinase B signal transduction (GO:0051897)	202	20	7.56	+	2.65	7.49e-05	0.00446
glial cell differentiation (GO:0010001)	223	22	8.34	+	2.64	3.52e-05	0.00241
regulation of transmembrane receptor protein serine/threonine kinase signaling pathway (GO:0090092)	274	27	10.25	+	2.63	4.85e-06	0.000438
mesoderm development (GO:0007498)	133	13	4.98	+	2.61	0.00147	0.043
regulation of cell projection assembly (GO:0060491)	205	20	7.67	+	2.61	9.2e-05	0.0053
regulation of axonogenesis (GO:0050770)	144	14	5.39	+	2.6	0.00103	0.0335
regulation of transforming growth factor beta receptor signaling pathway (GO:0017015)	144	14	5.39	+	2.6	0.00103	0.0334
transport along microtubule (GO:0010970)	175	17	6.55	+	2.6	0.000317	0.0137
mitotic cell cycle phase transition (GO:0044772)	145	14	5.43	+	2.58	0.0011	0.0351
regulation of phosphatidylinositol 3-kinase/protein kinase B signal transduction (GO:0051896)	280	27	10.48	+	2.58	7.25e-06	0.000628
phosphatidylinositol metabolic process (GO:0046488)	146	14	5.46	+	2.56	0.00118	0.0367
glycerophospholipid biosynthetic process (GO:0046474)	188	18	7.03	+	2.56	0.000256	0.0115
protein localization to plasma membrane (GO:0072659)	199	19	7.45	+	2.55	0.000181	0.00903
regulation of cell motility (GO:2000145)	1017	97	38.05	+	2.55	1.86e-17	3.06e-14
regulation of locomotion (GO:0040012)	1059	101	39.62	+	2.55	3.6e-18	1.33e-14
regulation of cellular response to transforming growth factor beta stimulus (GO:1903844)	147	14	5.5	+	2.55	0.00126	0.0386
cell cycle phase transition (GO:0044770)	158	15	5.91	+	2.54	0.000888	0.0302
cell division (GO:0051301)	527	50	19.72	+	2.54	1.72e-09	3.44e-07
gonad development (GO:0008406)	232	22	8.68	+	2.53	6.41e-05	0.00394
regulation of protein localization to nucleus (GO:1900180)	148	14	5.54	+	2.53	0.00135	0.0411
regulation of endocytosis (GO:0030100)	308	29	11.52	+	2.52	5.36e-06	0.000479
vesicle-mediated transport in synapse (GO:0099003)	170	16	6.36	+	2.52	0.000667	0.0242
regulation of plasma membrane bounded cell projection assembly (GO:0120032)	202	19	7.56	+	2.51	0.00022	0.0102
negative regulation of growth (GO:0045926)	224	21	8.38	+	2.51	0.00011	0.00609
receptor-mediated endocytosis (GO:0006898)	172	16	6.44	+	2.49	0.000757	0.0267
regulation of endothelial cell migration (GO:0010594)	172	16	6.44	+	2.49	0.000757	0.0266
development of primary sexual characteristics (GO:0045137)	237	22	8.87	+	2.48	8.79e-05	0.00511
synaptic vesicle cycle (GO:0099504)	151	14	5.65	+	2.48	0.00163	0.0472
positive regulation of protein-containing complex assembly (GO:0031334)	205	19	7.67	+	2.48	0.000265	0.0118
cell surface receptor protein tyrosine kinase signaling pathway (GO:0007169)	432	40	16.16	+	2.47	2.02e-07	2.8e-05
positive regulation of leukocyte migration (GO:0002687)	152	14	5.69	+	2.46	0.00174	0.0489
negative regulation of Wnt signaling pathway (GO:0030178)	174	16	6.51	+	2.46	0.000858	0.0295
positive regulation of phosphorylation (GO:0042327)	272	25	10.18	+	2.46	3.52e-05	0.00241
regulation of phosphorylation (GO:0042325)	458	42	17.14	+	2.45	1.13e-07	1.67e-05
ossification (GO:0001503)	285	26	10.66	+	2.44	4.57e-05	0.00302
cellular response to chemical stress (GO:0062197)	287	26	10.74	+	2.42	4.8e-05	0.00315
glycerolipid biosynthetic process (GO:0045017)	210	19	7.86	+	2.42	0.00036	0.0153
cytoskeleton-dependent intracellular transport (GO:0030705)	199	18	7.45	+	2.42	0.000511	0.0199
negative regulation of phosphorus metabolic process (GO:0010563)	178	16	6.66	+	2.4	0.00109	0.0349
negative regulation of phosphate metabolic process (GO:0045936)	178	16	6.66	+	2.4	0.00109	0.0348
positive regulation of vasculature development (GO:1904018)	168	15	6.29	+	2.39	0.00165	0.0473
cellular response to peptide hormone stimulus (GO:0071375)	258	23	9.65	+	2.38	0.000163	0.00841
regulation of kinase activity (GO:0043549)	270	24	10.1	+	2.38	0.000116	0.00636
gliogenesis (GO:0042063)	282	25	10.55	+	2.37	8.34e-05	0.0049
regulation of canonical Wnt signaling pathway (GO:0060828)	261	23	9.77	+	2.36	0.000179	0.00898
morphogenesis of a branching structure (GO:0001763)	182	16	6.81	+	2.35	0.00138	0.0415
positive regulation of cellular component biogenesis (GO:0044089)	502	44	18.78	+	2.34	2.45e-07	3.33e-05
cellular response to endogenous stimulus (GO:0071495)	936	82	35.02	+	2.34	6.78e-13	2.79e-10
negative regulation of cell adhesion (GO:0007162)	297	26	11.11	+	2.34	6.76e-05	0.00414
cell migration (GO:0016477)	941	82	35.21	+	2.33	8.48e-13	3.39e-10
positive regulation of phosphorus metabolic process (GO:0010562)	334	29	12.5	+	2.32	2.77e-05	0.00196
positive regulation of phosphate metabolic process (GO:0045937)	334	29	12.5	+	2.32	2.77e-05	0.00195
response to hypoxia (GO:0001666)	289	25	10.81	+	2.31	0.000109	0.00612
extracellular matrix organization (GO:0030198)	289	25	10.81	+	2.31	0.000109	0.0061
response to endogenous stimulus (GO:0009719)	1205	104	45.09	+	2.31	8.66e-16	6.41e-13
extracellular structure organization (GO:0043062)	290	25	10.85	+	2.3	0.000114	0.00629
connective tissue development (GO:0061448)	244	21	9.13	+	2.3	0.000443	0.018
external encapsulating structure organization (GO:0045229)	291	25	10.89	+	2.3	0.000119	0.00642
response to decreased oxygen levels (GO:0036293)	303	26	11.34	+	2.29	8.75e-05	0.0051
positive regulation of cell projection organization (GO:0031346)	351	30	13.13	+	2.28	2.6e-05	0.00188
negative regulation of transport (GO:0051051)	413	35	15.45	+	2.27	8.53e-06	0.000714
regulation of anatomical structure morphogenesis (GO:0022603)	838	71	31.35	+	2.26	1.53e-10	3.79e-08
actin cytoskeleton organization (GO:0030036)	543	46	20.32	+	2.26	2.49e-07	3.36e-05
regulation of protein kinase activity (GO:0045859)	248	21	9.28	+	2.26	0.000517	0.0199
endocytosis (GO:0006897)	508	43	19.01	+	2.26	6.52e-07	7.92e-05
positive regulation of protein catabolic process (GO:0045732)	215	18	8.04	+	2.24	0.00152	0.0443
regulation of cellular component size (GO:0032535)	360	30	13.47	+	2.23	5.43e-05	0.00348
positive regulation of MAPK cascade (GO:0043410)	456	38	17.06	+	2.23	4.28e-06	0.000397
endosomal transport (GO:0016197)	265	22	9.91	+	2.22	0.000468	0.0186
regulation of phosphate metabolic process (GO:0019220)	604	50	22.6	+	2.21	1.63e-07	2.34e-05
regulation of phosphorus metabolic process (GO:0051174)	605	50	22.64	+	2.21	1.69e-07	2.41e-05
regulation of Wnt signaling pathway (GO:0030111)	339	28	12.68	+	2.21	0.000114	0.0063
regulation of protein phosphorylation (GO:0001932)	412	34	15.41	+	2.21	1.73e-05	0.00134
cell junction assembly (GO:0034329)	303	25	11.34	+	2.21	0.000312	0.0136
cell junction organization (GO:0034330)	571	47	21.36	+	2.2	4.67e-07	5.72e-05
regulation of developmental growth (GO:0048638)	316	26	11.82	+	2.2	0.000227	0.0105
reproductive structure development (GO:0048608)	305	25	11.41	+	2.19	0.000325	0.014
positive regulation of cellular component organization (GO:0051130)	1112	91	41.61	+	2.19	1.57e-12	5.95e-10
response to oxygen levels (GO:0070482)	330	27	12.35	+	2.19	0.000172	0.00869
regulation of cell junction assembly (GO:1901888)	269	22	10.06	+	2.19	0.00056	0.0213
regulation of cell morphogenesis (GO:0022604)	245	20	9.17	+	2.18	0.00103	0.0335
cognition (GO:0050890)	331	27	12.38	+	2.18	0.000177	0.00889
intracellular signaling cassette (GO:0141124)	847	69	31.69	+	2.18	1.36e-09	2.83e-07
negative regulation of intracellular signal transduction (GO:1902532)	725	59	27.13	+	2.18	2.16e-08	3.63e-06
response to peptide hormone (GO:0043434)	381	31	14.26	+	2.17	5.34e-05	0.00344
regulation of cell growth (GO:0001558)	406	33	15.19	+	2.17	3.01e-05	0.0021
glycerophospholipid metabolic process (GO:0006650)	283	23	10.59	+	2.17	0.000666	0.0243
learning or memory (GO:0007611)	283	23	10.59	+	2.17	0.000666	0.0242
modulation of chemical synaptic transmission (GO:0050804)	505	41	18.89	+	2.17	3.83e-06	0.00036
regulation of trans-synaptic signaling (GO:0099177)	506	41	18.93	+	2.17	3.96e-06	0.000369
regulation of synapse organization (GO:0050807)	310	25	11.6	+	2.16	0.000369	0.0156
reproductive system development (GO:0061458)	310	25	11.6	+	2.16	0.000369	0.0155
telencephalon development (GO:0021537)	286	23	10.7	+	2.15	0.000712	0.0254
sex differentiation (GO:0007548)	286	23	10.7	+	2.15	0.000712	0.0254
positive regulation of protein phosphorylation (GO:0001934)	249	20	9.32	+	2.15	0.00123	0.0379
regulation of protein catabolic process (GO:0042176)	374	30	13.99	+	2.14	8.83e-05	0.00511
regulation of cellular response to growth factor stimulus (GO:0090287)	325	26	12.16	+	2.14	0.000294	0.0129
actin filament-based process (GO:0030029)	617	49	23.09	+	2.12	7.6e-07	8.94e-05
regulation of cell projection organization (GO:0031344)	655	52	24.51	+	2.12	3.24e-07	4.25e-05
positive regulation of intracellular signal transduction (GO:1902533)	1135	90	42.47	+	2.12	1.52e-11	4.7e-09
regulation of vasculature development (GO:1901342)	303	24	11.34	+	2.12	0.000592	0.0222
regulation of synapse structure or activity (GO:0050803)	316	25	11.82	+	2.11	0.000446	0.0181
regulation of cellular component biogenesis (GO:0044087)	1025	81	38.35	+	2.11	1.79e-10	4.2e-08
localization within membrane (GO:0051668)	558	44	20.88	+	2.11	3.79e-06	0.000357
import into cell (GO:0098657)	701	55	26.23	+	2.1	2.4e-07	3.29e-05
intracellular signal transduction (GO:0035556)	1778	139	66.52	+	2.09	3.64e-17	4.14e-14
synapse organization (GO:0050808)	371	29	13.88	+	2.09	0.00024	0.0109
regulation of transferase activity (GO:0051338)	320	25	11.97	+	2.09	0.000513	0.0199
regulation of MAPK cascade (GO:0043408)	654	51	24.47	+	2.08	8.77e-07	0.000101
regulation of growth (GO:0040008)	604	47	22.6	+	2.08	3.08e-06	0.000297
regulation of angiogenesis (GO:0045765)	296	23	11.07	+	2.08	0.000954	0.032
positive regulation of protein localization (GO:1903829)	505	39	18.89	+	2.06	2.23e-05	0.00164
regulation of protein localization (GO:0032880)	907	70	33.94	+	2.06	9.28e-09	1.66e-06
supramolecular fiber organization (GO:0097435)	609	47	22.79	+	2.06	3.39e-06	0.000322
negative regulation of developmental process (GO:0051093)	934	72	34.95	+	2.06	5.47e-09	1e-06
regulation of plasma membrane bounded cell projection organization (GO:0120035)	637	49	23.83	+	2.06	2e-06	0.000208
regulation of cellular localization (GO:0060341)	1019	78	38.13	+	2.05	1.66e-09	3.43e-07
positive regulation of catalytic activity (GO:0043085)	340	26	12.72	+	2.04	0.000704	0.0252
regulation of protein-containing complex assembly (GO:0043254)	432	33	16.16	+	2.04	0.00015	0.00784
regulation of vesicle-mediated transport (GO:0060627)	550	42	20.58	+	2.04	1.74e-05	0.00133
mitotic cell cycle process (GO:1903047)	511	39	19.12	+	2.04	2.65e-05	0.00191
positive regulation of apoptotic process (GO:0043065)	525	40	19.64	+	2.04	2.09e-05	0.00155
phosphorylation (GO:0016310)	394	30	14.74	+	2.04	0.000235	0.0107
positive regulation of programmed cell death (GO:0043068)	542	41	20.28	+	2.02	2.56e-05	0.00187
cell projection morphogenesis (GO:0048858)	516	39	19.31	+	2.02	3.12e-05	0.00217
neuron projection morphogenesis (GO:0048812)	504	38	18.86	+	2.02	4.22e-05	0.0028
cellular response to abiotic stimulus (GO:0071214)	332	25	12.42	+	2.01	0.00106	0.0341
cellular response to environmental stimulus (GO:0104004)	332	25	12.42	+	2.01	0.00106	0.034
forebrain development (GO:0030900)	412	31	15.41	+	2.01	0.000305	0.0133
regulation of neuron projection development (GO:0010975)	439	33	16.43	+	2.01	0.000171	0.00867
gland development (GO:0048732)	426	32	15.94	+	2.01	0.00023	0.0106
positive regulation of catabolic process (GO:0009896)	533	40	19.94	+	2.01	3.72e-05	0.0025
anatomical structure formation involved in morphogenesis (GO:0048646)	991	74	37.08	+	2	1.42e-08	2.45e-06
regulation of anatomical structure size (GO:0090066)	509	38	19.04	+	2	7.02e-05	0.00424
plasma membrane bounded cell projection morphogenesis (GO:0120039)	509	38	19.04	+	2	7.02e-05	0.00423
positive regulation of response to external stimulus (GO:0032103)	576	43	21.55	+	2	1.75e-05	0.00133
neuron projection development (GO:0031175)	725	54	27.13	+	1.99	1.88e-06	0.000197
autophagy (GO:0006914)	336	25	12.57	+	1.99	0.00116	0.0364
process utilizing autophagic mechanism (GO:0061919)	336	25	12.57	+	1.99	0.00116	0.0363
regulation of intracellular signal transduction (GO:1902531)	2005	149	75.02	+	1.99	1.45e-16	1.27e-13
response to hormone (GO:0009725)	797	59	29.82	+	1.98	7.88e-07	9.19e-05
glycerolipid metabolic process (GO:0046486)	352	26	13.17	+	1.97	0.000958	0.0321
negative regulation of cell differentiation (GO:0045596)	677	50	25.33	+	1.97	6.71e-06	0.000585
axon development (GO:0061564)	434	32	16.24	+	1.97	0.000277	0.0122
negative regulation of signal transduction (GO:0009968)	1384	102	51.78	+	1.97	3.4e-11	9.69e-09
growth (GO:0040007)	462	34	17.29	+	1.97	0.00017	0.00868
developmental growth (GO:0048589)	462	34	17.29	+	1.97	0.00017	0.00865
head development (GO:0060322)	802	59	30.01	+	1.97	8.57e-07	9.92e-05
neuron development (GO:0048666)	898	66	33.6	+	1.96	1.88e-07	2.63e-05
positive regulation of secretion (GO:0051047)	327	24	12.23	+	1.96	0.00172	0.0486
cell motility (GO:0048870)	1172	86	43.85	+	1.96	2.49e-09	4.85e-07
vesicle-mediated transport (GO:0016192)	1311	96	49.05	+	1.96	2.23e-10	5.01e-08
response to wounding (GO:0009611)	451	33	16.87	+	1.96	0.000236	0.0107
vasculature development (GO:0001944)	561	41	20.99	+	1.95	5.94e-05	0.00373
positive regulation of signal transduction (GO:0009967)	1605	117	60.05	+	1.95	2.05e-12	7.24e-10
protein localization to membrane (GO:0072657)	467	34	17.47	+	1.95	0.000273	0.012
establishment of organelle localization (GO:0051656)	426	31	15.94	+	1.94	0.000418	0.0171
negative regulation of cell population proliferation (GO:0008285)	703	51	26.3	+	1.94	6.49e-06	0.000572
positive regulation of transport (GO:0051050)	842	61	31.5	+	1.94	9.66e-07	0.000109
blood vessel morphogenesis (GO:0048514)	442	32	16.54	+	1.94	0.000503	0.0196
cellular response to lipid (GO:0071396)	540	39	20.2	+	1.93	0.000116	0.00636
positive regulation of organelle organization (GO:0010638)	499	36	18.67	+	1.93	0.000176	0.00885
tube development (GO:0035295)	929	67	34.76	+	1.93	3.04e-07	4.05e-05
vesicle organization (GO:0016050)	361	26	13.51	+	1.92	0.00172	0.0487
regulation of inflammatory response (GO:0050727)	403	29	15.08	+	1.92	0.000783	0.0272
negative regulation of cell communication (GO:0010648)	1480	106	55.37	+	1.91	8.22e-11	2.1e-08
negative regulation of signaling (GO:0023057)	1481	106	55.41	+	1.91	8.39e-11	2.11e-08
generation of neurons (GO:0048699)	1218	87	45.57	+	1.91	5.35e-09	9.91e-07
tube morphogenesis (GO:0035239)	700	50	26.19	+	1.91	1.55e-05	0.00122
regulation of nervous system development (GO:0051960)	449	32	16.8	+	1.9	0.000562	0.0212
mitotic cell cycle (GO:0000278)	591	42	22.11	+	1.9	9.31e-05	0.00534
cellular response to hormone stimulus (GO:0032870)	537	38	20.09	+	1.89	0.000185	0.00918
blood vessel development (GO:0001568)	537	38	20.09	+	1.89	0.000185	0.00914
positive regulation of cell communication (GO:0010647)	1795	127	67.16	+	1.89	1.58e-12	5.86e-10
positive regulation of signaling (GO:0023056)	1797	127	67.23	+	1.89	1.66e-12	5.99e-10
cellular response to oxygen-containing compound (GO:1901701)	1063	75	39.77	+	1.89	1.18e-07	1.72e-05
regulation of supramolecular fiber organization (GO:1902903)	397	28	14.85	+	1.89	0.00124	0.0383
regulation of cellular component organization (GO:0051128)	2486	175	93.01	+	1.88	3.8e-17	3.75e-14
neuron differentiation (GO:0030182)	1138	80	42.58	+	1.88	4.95e-08	7.88e-06
negative regulation of cellular component organization (GO:0051129)	699	49	26.15	+	1.87	2.57e-05	0.00186
heart development (GO:0007507)	573	40	21.44	+	1.87	0.000186	0.00916
negative regulation of multicellular organismal process (GO:0051241)	1136	79	42.5	+	1.86	1.16e-07	1.71e-05
circulatory system development (GO:0072359)	950	66	35.54	+	1.86	1.17e-06	0.00013
neurogenesis (GO:0022008)	1413	98	52.87	+	1.85	2.54e-09	4.89e-07
regulation of developmental process (GO:0050793)	2457	170	91.93	+	1.85	5.63e-16	4.39e-13
regulation of localization (GO:0032879)	2010	139	75.2	+	1.85	5.72e-13	2.49e-10
negative regulation of protein metabolic process (GO:0051248)	551	38	20.62	+	1.84	0.000347	0.0148
regulation of protein modification process (GO:0031399)	668	46	24.99	+	1.84	6.91e-05	0.0042
regulation of membrane potential (GO:0042391)	465	32	17.4	+	1.84	0.00111	0.0353
cell adhesion (GO:0007155)	965	66	36.11	+	1.83	2.13e-06	0.000217
regulation of catalytic activity (GO:0050790)	600	41	22.45	+	1.83	0.000261	0.0117
negative regulation of immune system process (GO:0002683)	543	37	20.32	+	1.82	0.000497	0.0195
skeletal system development (GO:0001501)	514	35	19.23	+	1.82	0.000836	0.0289
brain development (GO:0007420)	751	51	28.1	+	1.82	4.76e-05	0.00314
response to lipid (GO:0033993)	855	58	31.99	+	1.81	1.23e-05	0.001
regulation of cell differentiation (GO:0045595)	1563	106	58.48	+	1.81	1.67e-09	3.39e-07
cell cycle process (GO:0022402)	903	61	33.79	+	1.81	8.76e-06	0.00073
negative regulation of response to stimulus (GO:0048585)	1732	117	64.8	+	1.81	3.04e-10	6.73e-08
regulation of system process (GO:0044057)	563	38	21.06	+	1.8	0.000436	0.0178
cytoskeleton organization (GO:0007010)	1277	86	47.78	+	1.8	1.08e-07	1.62e-05
circulatory system process (GO:0003013)	522	35	19.53	+	1.79	0.000934	0.0315
regulation of multicellular organismal development (GO:2000026)	1405	94	52.57	+	1.79	3.37e-08	5.54e-06
regulation of establishment of protein localization (GO:0070201)	539	36	20.17	+	1.79	0.000771	0.0269
regulation of catabolic process (GO:0009894)	1034	69	38.69	+	1.78	3.01e-06	0.000291
response to cytokine (GO:0034097)	840	56	31.43	+	1.78	3.6e-05	0.00243
tissue development (GO:0009888)	1800	120	67.35	+	1.78	4.11e-10	8.81e-08
positive regulation of response to stimulus (GO:0048584)	2296	153	85.9	+	1.78	6.01e-13	2.54e-10
cellular macromolecule localization (GO:0070727)	1996	133	74.68	+	1.78	2.92e-11	8.49e-09
cell death (GO:0008219)	1112	74	41.61	+	1.78	1.34e-06	0.000145
response to peptide (GO:1901652)	857	57	32.06	+	1.78	2.86e-05	0.00201
apoptotic process (GO:0006915)	1068	71	39.96	+	1.78	2.74e-06	0.000271
regulation of signal transduction (GO:0009966)	3101	206	116.02	+	1.78	1.4e-17	2.6e-14
protein localization (GO:0008104)	1988	132	74.38	+	1.77	6.03e-11	1.6e-08
central nervous system development (GO:0007417)	1040	69	38.91	+	1.77	4.68e-06	0.000428
cell morphogenesis (GO:0000902)	724	48	27.09	+	1.77	0.00013	0.00697
regulation of cytoskeleton organization (GO:0051493)	543	36	20.32	+	1.77	0.00116	0.0364
regulation of transport (GO:0051049)	1599	106	59.83	+	1.77	5.89e-09	1.06e-06
regulation of apoptotic process (GO:0042981)	1465	97	54.81	+	1.77	4.02e-08	6.55e-06
animal organ morphogenesis (GO:0009887)	986	65	36.89	+	1.76	9.4e-06	0.000778
regulation of response to external stimulus (GO:0032101)	1108	73	41.46	+	1.76	2.75e-06	0.000269
cellular response to cytokine stimulus (GO:0071345)	744	49	27.84	+	1.76	0.000156	0.00811
intracellular transport (GO:0046907)	1200	79	44.9	+	1.76	9.25e-07	0.000105
cellular response to nitrogen compound (GO:1901699)	593	39	22.19	+	1.76	0.000616	0.0228
anatomical structure morphogenesis (GO:0009653)	2270	149	84.93	+	1.75	4.18e-12	1.41e-09
positive regulation of cell population proliferation (GO:0008284)	930	61	34.8	+	1.75	1.91e-05	0.00144
tissue morphogenesis (GO:0048729)	580	38	21.7	+	1.75	0.000797	0.0276
regulation of programmed cell death (GO:0043067)	1513	99	56.61	+	1.75	4.37e-08	7.04e-06
establishment of protein localization (GO:0045184)	1318	86	49.31	+	1.74	3.99e-07	5.01e-05
organelle localization (GO:0051640)	552	36	20.65	+	1.74	0.0013	0.0397
regulation of cell population proliferation (GO:0042127)	1659	108	62.07	+	1.74	1.09e-08	1.93e-06
programmed cell death (GO:0012501)	1107	72	41.42	+	1.74	4.34e-06	0.0004
regulation of protein metabolic process (GO:0051246)	1512	98	56.57	+	1.73	9.59e-08	1.45e-05
cell cycle (GO:0007049)	992	64	37.12	+	1.72	2.22e-05	0.00164
positive regulation of cell differentiation (GO:0045597)	869	56	32.51	+	1.72	7.48e-05	0.00447
chemical homeostasis (GO:0048878)	917	59	34.31	+	1.72	5.26e-05	0.0034
response to abiotic stimulus (GO:0009628)	1135	73	42.47	+	1.72	5.62e-06	0.000498
cell population proliferation (GO:0008283)	747	48	27.95	+	1.72	0.000256	0.0116
negative regulation of apoptotic process (GO:0043066)	888	57	33.22	+	1.72	8.64e-05	0.00506
nervous system development (GO:0007399)	2279	146	85.27	+	1.71	5.23e-11	1.44e-08
positive regulation of developmental process (GO:0051094)	1328	85	49.69	+	1.71	1.36e-06	0.000147
negative regulation of programmed cell death (GO:0043069)	923	59	34.53	+	1.71	5.77e-05	0.00364
macromolecule localization (GO:0033036)	2411	154	90.21	+	1.71	1.5e-11	4.71e-09
regulation of signaling (GO:0023051)	3541	226	132.49	+	1.71	2.4e-17	3.24e-14
regulation of cell communication (GO:0010646)	3546	226	132.67	+	1.7	2.56e-17	3.16e-14
regulation of cell adhesion (GO:0030155)	801	51	29.97	+	1.7	0.000268	0.0119
regulation of cytokine production (GO:0001817)	802	51	30.01	+	1.7	0.000271	0.012
regulation of multicellular organismal process (GO:0051239)	2972	188	111.2	+	1.69	9.53e-14	4.41e-11
epithelium development (GO:0060429)	1129	71	42.24	+	1.68	1.67e-05	0.0013
cellular localization (GO:0051641)	2706	170	101.24	+	1.68	4.61e-12	1.52e-09
response to oxygen-containing compound (GO:1901700)	1550	97	57.99	+	1.67	4.54e-07	5.61e-05
system development (GO:0048731)	3629	227	135.78	+	1.67	1.85e-16	1.52e-13
positive regulation of protein metabolic process (GO:0051247)	817	51	30.57	+	1.67	0.000328	0.0141
positive regulation of multicellular organismal process (GO:0051240)	1661	103	62.15	+	1.66	3.4e-07	4.31e-05
cell development (GO:0048468)	2307	143	86.32	+	1.66	1e-09	2.12e-07
membrane organization (GO:0061024)	775	48	29	+	1.66	0.000664	0.0242
multicellular organism development (GO:0007275)	4029	247	150.74	+	1.64	5.54e-17	5.13e-14
hemopoiesis (GO:0030097)	704	43	26.34	+	1.63	0.00162	0.047
regulation of organelle organization (GO:0033043)	1179	72	44.11	+	1.63	4.85e-05	0.00316
protein transport (GO:0015031)	1102	67	41.23	+	1.62	8.3e-05	0.0049
cell surface receptor signaling pathway (GO:0007166)	2124	129	79.47	+	1.62	2.27e-08	3.78e-06
establishment of localization in cell (GO:0051649)	1651	100	61.77	+	1.62	1.37e-06	0.000147
regulation of molecular function (GO:0065009)	1011	61	37.83	+	1.61	0.000235	0.0107
phosphorus metabolic process (GO:0006793)	1430	86	53.5	+	1.61	1.27e-05	0.00103
cell activation (GO:0001775)	765	46	28.62	+	1.61	0.00174	0.0489
cell projection organization (GO:0030030)	1248	75	46.69	+	1.61	5.54e-05	0.00354
response to nitrogen compound (GO:1901698)	1001	60	37.45	+	1.6	0.00031	0.0135
positive regulation of cellular process (GO:0048522)	5813	348	217.49	+	1.6	1.98e-24	2.93e-20
cellular response to chemical stimulus (GO:0070887)	1959	117	73.3	+	1.6	3.31e-07	4.3e-05
cell differentiation (GO:0030154)	3752	224	140.38	+	1.6	7.02e-14	3.59e-11
cellular developmental process (GO:0048869)	3755	224	140.49	+	1.59	7.24e-14	3.57e-11
phosphate-containing compound metabolic process (GO:0006796)	1427	85	53.39	+	1.59	1.81e-05	0.00138
plasma membrane bounded cell projection organization (GO:0120036)	1194	71	44.67	+	1.59	0.000108	0.00605
regulation of biological quality (GO:0065008)	3003	178	112.36	+	1.58	1.58e-10	3.84e-08
animal organ development (GO:0048513)	2904	172	108.65	+	1.58	3.56e-10	7.76e-08
regulation of defense response (GO:0031347)	845	50	31.62	+	1.58	0.00153	0.0443
homeostatic process (GO:0042592)	1493	88	55.86	+	1.58	1.95e-05	0.00146
positive regulation of biological process (GO:0048518)	6113	359	228.72	+	1.57	9.4e-24	6.96e-20
regulation of response to stimulus (GO:0048583)	4107	241	153.66	+	1.57	2.98e-14	1.63e-11
negative regulation of cellular process (GO:0048523)	5027	294	188.09	+	1.56	6.08e-18	1.5e-14
regulation of immune system process (GO:0002682)	1653	96	61.85	+	1.55	1.39e-05	0.00111
negative regulation of biological process (GO:0048519)	5248	301	196.35	+	1.53	3.78e-17	4e-14
nitrogen compound transport (GO:0071705)	1537	88	57.51	+	1.53	6.23e-05	0.00384
regulation of cell cycle (GO:0051726)	1071	61	40.07	+	1.52	0.00118	0.0367
cellular response to stress (GO:0033554)	1648	93	61.66	+	1.51	6.08e-05	0.00378
anatomical structure development (GO:0048856)	5304	296	198.45	+	1.49	3.62e-15	2.44e-12
organelle organization (GO:0006996)	3086	169	115.46	+	1.46	1.77e-07	2.49e-05
localization (GO:0051179)	4549	249	170.2	+	1.46	2.42e-11	7.17e-09
negative regulation of macromolecule metabolic process (GO:0010605)	2493	136	93.28	+	1.46	4.72e-06	0.000429
cellular component organization (GO:0016043)	5717	311	213.9	+	1.45	1.6e-14	9.46e-12
regulation of response to stress (GO:0080134)	1434	78	53.65	+	1.45	0.000863	0.0294
negative regulation of metabolic process (GO:0009892)	2721	148	101.81	+	1.45	2.14e-06	0.000217
transport (GO:0006810)	3722	202	139.26	+	1.45	1.15e-08	2e-06
establishment of localization (GO:0051234)	4006	216	149.88	+	1.44	4.3e-09	8.07e-07
developmental process (GO:0032502)	5830	314	218.13	+	1.44	4.37e-14	2.31e-11
signal transduction (GO:0007165)	4942	265	184.9	+	1.43	3.7e-11	1.04e-08
cellular component organization or biogenesis (GO:0071840)	5931	313	221.91	+	1.41	9.38e-13	3.66e-10
signaling (GO:0023052)	5282	278	197.63	+	1.41	7.51e-11	1.95e-08
cell communication (GO:0007154)	5328	278	199.35	+	1.39	1.98e-10	4.51e-08
positive regulation of metabolic process (GO:0009893)	3458	179	129.38	+	1.38	2.84e-06	0.000277
cellular component assembly (GO:0022607)	2516	130	94.14	+	1.38	0.00013	0.00698
negative regulation of biosynthetic process (GO:0009890)	2191	113	81.98	+	1.38	0.000424	0.0173
negative regulation of macromolecule biosynthetic process (GO:0010558)	2118	109	79.24	+	1.38	0.000552	0.021
multicellular organismal process (GO:0032501)	6408	327	239.76	+	1.36	1.62e-11	4.91e-09
cellular response to stimulus (GO:0051716)	6478	330	242.37	+	1.36	1.43e-11	4.59e-09
response to chemical (GO:0042221)	3714	186	138.96	+	1.34	1.62e-05	0.00127
response to stress (GO:0006950)	3539	173	132.41	+	1.31	0.000141	0.00743
positive regulation of macromolecule metabolic process (GO:0010604)	3138	152	117.41	+	1.29	0.000606	0.0226
regulation of cellular process (GO:0050794)	11417	540	427.17	+	1.26	2.22e-17	3.29e-14
response to stimulus (GO:0050896)	8280	391	309.8	+	1.26	1.82e-09	3.6e-07
regulation of metabolic process (GO:0019222)	6273	296	234.7	+	1.26	1.61e-06	0.00017
regulation of biological process (GO:0050789)	11815	556	442.06	+	1.26	5.54e-18	1.64e-14
biological regulation (GO:0065007)	12219	569	457.17	+	1.24	1.2e-17	2.54e-14
regulation of macromolecule metabolic process (GO:0060255)	5709	264	213.6	+	1.24	5.63e-05	0.00358
regulation of primary metabolic process (GO:0080090)	5174	236	193.59	+	1.22	0.000435	0.0177
cellular process (GO:0009987)	15563	670	582.29	+	1.15	1.53e-15	1.08e-12
biological_process (GO:0008150)	17724	729	663.14	+	1.1	9.8e-15	6.05e-12
RNA biosynthetic process (GO:0032774)	1406	29	52.61	-	0.55	0.000336	0.0144
RNA processing (GO:0006396)	879	13	32.89	-	0.4	8.2e-05	0.00486
Unclassified (UNCLASSIFIED)	2856	41	106.86	-	0.38	9.8e-15	6.31e-12
adaptive immune response (GO:0002250)	683	9	25.55	-	0.35	0.000195	0.00956
detection of stimulus (GO:0051606)	690	9	25.82	-	0.35	0.000202	0.00986
detection of chemical stimulus (GO:0009593)	523	4	19.57	-	0.2	3.26e-05	0.00224
detection of stimulus involved in sensory perception (GO:0050906)	564	4	21.1	-	0.19	8.11e-06	0.000687
sensory perception of chemical stimulus (GO:0007606)	551	3	20.62	-	0.15	2e-06	0.000208
sensory perception of smell (GO:0007608)	472	1	17.66	-	0.06	4.53e-07	5.64e-05
detection of chemical stimulus involved in sensory perception of smell (GO:0050911)	440	0	16.46	-	< 0.01	7.26e-08	1.13e-05
detection of chemical stimulus involved in sensory perception (GO:0050907)	487	0	18.22	-	< 0.01	1.58e-08	2.7e-06

## Sheet: GSF-F_log2FC > 0.5
Analysis Type:	PANTHER Overrepresentation Test (Released 20240807)
Annotation Version and Release Date:	GO Ontology database DOI: 10.5281/zenodo.15066566 Released 2025-03-16
Analyzed List:	Client Text Box Input (Homo sapiens)
Reference List:	Homo sapiens (all genes in database)
Test Type:	FISHER
Correction:	FDR
GO biological process complete	Homo sapiens - REFLIST (20580)	Client Text Box Input (90)	Client Text Box Input (expected)	Client Text Box Input (over/under)	Client Text Box Input (fold Enrichment)	Client Text Box Input (raw P-value)	Client Text Box Input (FDR)
relaxation of muscle (GO:0090075)	21	3	0.09	+	32.67	0.000102	0.0443
regulation of bone mineralization (GO:0030500)	81	6	0.35	+	16.94	1.47e-06	0.00218
regulation of biomineral tissue development (GO:0070167)	102	7	0.45	+	15.69	3.18e-07	0.00118
regulation of amine transport (GO:0051952)	78	5	0.34	+	14.66	2.35e-05	0.0158
regulation of ossification (GO:0030278)	126	7	0.55	+	12.7	1.34e-06	0.0022
regulation of smooth muscle cell proliferation (GO:0048660)	136	7	0.59	+	11.77	2.23e-06	0.00275
response to carbohydrate (GO:0009743)	172	6	0.75	+	7.98	0.000109	0.0461
ossification (GO:0001503)	285	8	1.25	+	6.42	3.56e-05	0.0203
renal system development (GO:0072001)	317	8	1.39	+	5.77	7.52e-05	0.0348
negative regulation of transport (GO:0051051)	413	10	1.81	+	5.54	1.3e-05	0.00964
inorganic ion homeostasis (GO:0098771)	444	10	1.94	+	5.15	2.42e-05	0.0156
regulation of transmembrane transport (GO:0034762)	417	9	1.82	+	4.94	8.76e-05	0.0393
intracellular chemical homeostasis (GO:0055082)	573	12	2.51	+	4.79	7.34e-06	0.00604
modulation of chemical synaptic transmission (GO:0050804)	505	10	2.21	+	4.53	7.15e-05	0.0353
regulation of trans-synaptic signaling (GO:0099177)	506	10	2.21	+	4.52	7.27e-05	0.0347
regulation of cell migration (GO:0030334)	958	17	4.19	+	4.06	7.43e-07	0.00183
cellular homeostasis (GO:0019725)	690	12	3.02	+	3.98	4.59e-05	0.0243
regulation of locomotion (GO:0040012)	1059	18	4.63	+	3.89	6.23e-07	0.00184
regulation of cell motility (GO:2000145)	1017	17	4.45	+	3.82	1.69e-06	0.00227
response to oxygen-containing compound (GO:1901700)	1550	21	6.78	+	3.1	2.48e-06	0.00262
response to abiotic stimulus (GO:0009628)	1135	15	4.96	+	3.02	0.000113	0.0464
regulation of transport (GO:0051049)	1599	20	6.99	+	2.86	1.49e-05	0.0105
cellular response to chemical stimulus (GO:0070887)	1959	24	8.57	+	2.8	2.36e-06	0.00268
regulation of localization (GO:0032879)	2010	22	8.79	+	2.5	4.06e-05	0.0223
animal organ development (GO:0048513)	2904	30	12.7	+	2.36	4.17e-06	0.00363
system development (GO:0048731)	3629	37	15.87	+	2.33	1.73e-07	0.00128
multicellular organism development (GO:0007275)	4029	39	17.62	+	2.21	2.92e-07	0.00144
regulation of signaling (GO:0023051)	3541	34	15.49	+	2.2	3.4e-06	0.00336
regulation of cell communication (GO:0010646)	3546	34	15.51	+	2.19	3.47e-06	0.00321
regulation of multicellular organismal process (GO:0051239)	2972	28	13	+	2.15	5.51e-05	0.0282
response to chemical (GO:0042221)	3714	33	16.24	+	2.03	2.5e-05	0.0155
anatomical structure development (GO:0048856)	5304	45	23.2	+	1.94	7.89e-07	0.00146
multicellular organismal process (GO:0032501)	6408	53	28.02	+	1.89	6.32e-08	0.000937
developmental process (GO:0032502)	5830	48	25.5	+	1.88	7.76e-07	0.00164
positive regulation of biological process (GO:0048518)	6113	47	26.73	+	1.76	7.9e-06	0.00616
positive regulation of cellular process (GO:0048522)	5813	44	25.42	+	1.73	3.2e-05	0.019

## Sheet: GSF-S_up-regulated
Analysis Type:	PANTHER Overrepresentation Test (Released 20240807)
Annotation Version and Release Date:	GO Ontology database DOI: 10.5281/zenodo.15066566 Released 2025-03-16
Analyzed List:	Client Text Box Input (Homo sapiens)
Reference List:	Homo sapiens (all genes in database)
Test Type:	FISHER
Correction:	FDR
GO biological process complete	Homo sapiens - REFLIST (20580)	Client Text Box Input (523)	Client Text Box Input (expected)	Client Text Box Input (over/under)	Client Text Box Input (fold Enrichment)	Client Text Box Input (raw P-value)	Client Text Box Input (FDR)
regulation of systemic arterial blood pressure by atrial natriuretic peptide (GO:0003050)	2	2	0.05	+	39.35	0.000645	0.0274
vestibulocochlear nerve structural organization (GO:0021649)	2	2	0.05	+	39.35	0.000645	0.0274
dorsal root ganglion morphogenesis (GO:1904835)	2	2	0.05	+	39.35	0.000645	0.0273
response to 1-oleoyl-sn-glycerol 3-phosphate (GO:1904565)	2	2	0.05	+	39.35	0.000645	0.0272
ganglion morphogenesis (GO:0061552)	2	2	0.05	+	39.35	0.000645	0.0271
regulation of transformation of host cell by virus (GO:1904187)	2	2	0.05	+	39.35	0.000645	0.0271
facioacoustic ganglion development (GO:1903375)	2	2	0.05	+	39.35	0.000645	0.027
lateral sprouting involved in mammary gland duct morphogenesis (GO:0060599)	2	2	0.05	+	39.35	0.000645	0.0269
trigeminal ganglion development (GO:0061551)	4	3	0.1	+	29.51	6.4e-05	0.00418
negative regulation of prostatic bud formation (GO:0060686)	4	3	0.1	+	29.51	6.4e-05	0.00416
hemidesmosome assembly (GO:0031581)	6	4	0.15	+	26.23	5.94e-06	0.000561
regulation of prostatic bud formation (GO:0060685)	6	4	0.15	+	26.23	5.94e-06	0.000557
tendon development (GO:0035989)	5	3	0.13	+	23.61	0.000157	0.00875
cranial ganglion development (GO:0061550)	5	3	0.13	+	23.61	0.000157	0.00872
ductus arteriosus closure (GO:0097070)	5	3	0.13	+	23.61	0.000157	0.00868
regulation of basement membrane organization (GO:0110011)	6	3	0.15	+	19.67	0.000308	0.0149
relaxation of vascular associated smooth muscle (GO:0060087)	6	3	0.15	+	19.67	0.000308	0.0149
neural crest cell migration involved in autonomic nervous system development (GO:1901166)	6	3	0.15	+	19.67	0.000308	0.0148
negative regulation of morphogenesis of an epithelium (GO:1905331)	8	4	0.2	+	19.67	2.66e-05	0.00197
regulation of endodermal cell differentiation (GO:1903224)	7	3	0.18	+	16.86	0.000529	0.0231
cell-cell adhesion mediated by integrin (GO:0033631)	7	3	0.18	+	16.86	0.000529	0.0231
relaxation of smooth muscle (GO:0044557)	7	3	0.18	+	16.86	0.000529	0.023
hepatocyte growth factor receptor signaling pathway (GO:0048012)	8	3	0.2	+	14.76	0.000831	0.0334
kidney vasculature morphogenesis (GO:0061439)	8	3	0.2	+	14.76	0.000831	0.0333
renal system vasculature morphogenesis (GO:0061438)	8	3	0.2	+	14.76	0.000831	0.0332
heart induction (GO:0003129)	8	3	0.2	+	14.76	0.000831	0.0331
lung vasculature development (GO:0060426)	11	4	0.28	+	14.31	0.000118	0.00702
facial nerve morphogenesis (GO:0021610)	11	4	0.28	+	14.31	0.000118	0.007
facial nerve development (GO:0021561)	11	4	0.28	+	14.31	0.000118	0.00697
elastic fiber assembly (GO:0048251)	11	4	0.28	+	14.31	0.000118	0.00694
regulation of heart morphogenesis (GO:2000826)	9	3	0.23	+	13.12	0.00122	0.0457
glutamine transport (GO:0006868)	9	3	0.23	+	13.12	0.00122	0.0456
plasma membrane raft assembly (GO:0044854)	9	3	0.23	+	13.12	0.00122	0.0455
negative regulation of synapse assembly (GO:0051964)	9	3	0.23	+	13.12	0.00122	0.0454
lateral sprouting from an epithelium (GO:0060601)	9	3	0.23	+	13.12	0.00122	0.0453
negative regulation of focal adhesion assembly (GO:0051895)	16	5	0.41	+	12.3	3.6e-05	0.00262
wound healing, spreading of epidermal cells (GO:0035313)	16	5	0.41	+	12.3	3.6e-05	0.0026
negative regulation of cell-substrate junction organization (GO:0150118)	16	5	0.41	+	12.3	3.6e-05	0.00259
positive regulation of integrin-mediated signaling pathway (GO:2001046)	13	4	0.33	+	12.11	0.000246	0.0125
membrane raft assembly (GO:0001765)	13	4	0.33	+	12.11	0.000246	0.0124
relaxation of cardiac muscle (GO:0055119)	13	4	0.33	+	12.11	0.000246	0.0124
UDP-N-acetylglucosamine metabolic process (GO:0006047)	14	4	0.36	+	11.24	0.000337	0.0159
relaxation of muscle (GO:0090075)	21	6	0.53	+	11.24	1.03e-05	0.000879
negative regulation of cell junction assembly (GO:1901889)	32	9	0.81	+	11.07	6.88e-08	1.27e-05
protein trimerization (GO:0070206)	18	5	0.46	+	10.93	6.77e-05	0.00438
regulation of animal organ formation (GO:0003156)	29	8	0.74	+	10.86	4.42e-07	5.9e-05
outflow tract septum morphogenesis (GO:0003148)	26	7	0.66	+	10.59	2.84e-06	0.000283
peptidyl-S-diacylglycerol-L-cysteine biosynthetic process from peptidyl-cysteine (GO:0018231)	15	4	0.38	+	10.49	0.00045	0.0205
peptidyl-L-cysteine S-palmitoylation (GO:0018230)	15	4	0.38	+	10.49	0.00045	0.0204
protein homotrimerization (GO:0070207)	15	4	0.38	+	10.49	0.00045	0.0203
cellular response to hepatocyte growth factor stimulus (GO:0035729)	15	4	0.38	+	10.49	0.00045	0.0203
negative regulation of fibroblast growth factor receptor signaling pathway (GO:0040037)	19	5	0.48	+	10.36	9e-05	0.00558
organ induction (GO:0001759)	23	6	0.58	+	10.27	1.83e-05	0.00143
cell-substrate junction assembly (GO:0007044)	40	10	1.02	+	9.84	4.41e-08	8.59e-06
response to hepatocyte growth factor (GO:0035728)	16	4	0.41	+	9.84	0.000588	0.0252
cell-substrate junction organization (GO:0150115)	42	10	1.07	+	9.37	7.31e-08	1.3e-05
preganglionic parasympathetic fiber development (GO:0021783)	17	4	0.43	+	9.26	0.000754	0.0309
intracellular potassium ion homeostasis (GO:0030007)	17	4	0.43	+	9.26	0.000754	0.0308
platelet-derived growth factor receptor signaling pathway (GO:0048008)	35	8	0.89	+	8.99	2.12e-06	0.000221
negative regulation of organic acid transport (GO:0032891)	22	5	0.56	+	8.94	0.000191	0.0102
extracellular matrix assembly (GO:0085029)	31	7	0.79	+	8.89	1.02e-05	0.000877
negative regulation of cell-matrix adhesion (GO:0001953)	36	8	0.91	+	8.74	2.67e-06	0.000269
heart formation (GO:0060914)	18	4	0.46	+	8.74	0.00095	0.0369
mesodermal cell differentiation (GO:0048333)	27	6	0.69	+	8.74	4.92e-05	0.00331
aorta morphogenesis (GO:0035909)	32	7	0.81	+	8.61	1.27e-05	0.00105
regulation of integrin-mediated signaling pathway (GO:2001044)	23	5	0.58	+	8.55	0.000239	0.0122
collagen fibril organization (GO:0030199)	65	14	1.65	+	8.48	7.33e-10	2.26e-07
trachea development (GO:0060438)	19	4	0.48	+	8.28	0.00118	0.0448
parasympathetic nervous system development (GO:0048486)	19	4	0.48	+	8.28	0.00118	0.0447
chondroitin sulfate proteoglycan biosynthetic process (GO:0050650)	24	5	0.61	+	8.2	0.000296	0.0144
artery morphogenesis (GO:0048844)	69	14	1.75	+	7.98	1.69e-09	5.01e-07
basement membrane organization (GO:0071711)	35	7	0.89	+	7.87	2.38e-05	0.00179
protein palmitoylation (GO:0018345)	25	5	0.64	+	7.87	0.000363	0.017
smooth muscle tissue development (GO:0048745)	25	5	0.64	+	7.87	0.000363	0.0169
endodermal cell differentiation (GO:0035987)	46	9	1.17	+	7.7	1.97e-06	0.00021
regulation of vascular endothelial growth factor receptor signaling pathway (GO:0030947)	32	6	0.81	+	7.38	0.000135	0.00773
amino sugar metabolic process (GO:0006040)	43	8	1.09	+	7.32	1.09e-05	0.00093
positive regulation of mesenchymal cell proliferation (GO:0002053)	27	5	0.69	+	7.29	0.000528	0.0232
mesenchymal cell proliferation (GO:0010463)	27	5	0.69	+	7.29	0.000528	0.0232
negative regulation of cell-substrate adhesion (GO:0010812)	60	11	1.52	+	7.21	2.86e-07	4.15e-05
positive regulation of cartilage development (GO:0061036)	33	6	0.84	+	7.15	0.000162	0.00887
endoderm formation (GO:0001706)	56	10	1.42	+	7.03	1.29e-06	0.000148
clathrin-dependent endocytosis (GO:0072583)	34	6	0.86	+	6.94	0.000192	0.0102
chondrocyte development (GO:0002063)	29	5	0.74	+	6.78	0.000745	0.0306
positive regulation of animal organ morphogenesis (GO:0110110)	35	6	0.89	+	6.75	0.000227	0.0118
developmental induction (GO:0031128)	35	6	0.89	+	6.75	0.000227	0.0117
regulation of mesenchymal cell proliferation (GO:0010464)	35	6	0.89	+	6.75	0.000227	0.0117
epiboly involved in wound healing (GO:0090505)	30	5	0.76	+	6.56	0.000876	0.0346
wound healing, spreading of cells (GO:0044319)	30	5	0.76	+	6.56	0.000876	0.0345
negative regulation of stress fiber assembly (GO:0051497)	30	5	0.76	+	6.56	0.000876	0.0344
chondroitin sulfate proteoglycan metabolic process (GO:0050654)	30	5	0.76	+	6.56	0.000876	0.0343
embryonic eye morphogenesis (GO:0048048)	36	6	0.91	+	6.56	0.000267	0.0133
nucleotide-sugar biosynthetic process (GO:0009226)	30	5	0.76	+	6.56	0.000876	0.0342
positive regulation of smooth muscle cell migration (GO:0014911)	36	6	0.91	+	6.56	0.000267	0.0132
cell adhesion mediated by integrin (GO:0033627)	42	7	1.07	+	6.56	8.2e-05	0.00517
negative regulation of endothelial cell proliferation (GO:0001937)	42	7	1.07	+	6.56	8.2e-05	0.00515
lung alveolus development (GO:0048286)	55	9	1.4	+	6.44	9.27e-06	0.000813
protein lipidation (GO:0006497)	37	6	0.94	+	6.38	0.000311	0.0149
smooth muscle cell differentiation (GO:0051145)	37	6	0.94	+	6.38	0.000311	0.0149
blood vessel endothelial cell migration (GO:0043534)	37	6	0.94	+	6.38	0.000311	0.0148
epiboly (GO:0090504)	31	5	0.79	+	6.35	0.00102	0.0395
regulation of vascular endothelial growth factor signaling pathway (GO:1900746)	31	5	0.79	+	6.35	0.00102	0.0394
negative regulation of lymphocyte apoptotic process (GO:0070229)	38	6	0.97	+	6.21	0.000362	0.017
extracellular matrix organization (GO:0030198)	289	45	7.34	+	6.13	1.1e-22	8.17e-19
nucleotide-sugar metabolic process (GO:0009225)	45	7	1.14	+	6.12	0.000129	0.00745
extracellular structure organization (GO:0043062)	290	45	7.37	+	6.11	1.27e-22	6.3e-19
external encapsulating structure organization (GO:0045229)	291	45	7.4	+	6.09	1.47e-22	5.46e-19
animal organ formation (GO:0048645)	39	6	0.99	+	6.05	0.000419	0.0193
O-glycan processing (GO:0016266)	39	6	0.99	+	6.05	0.000419	0.0193
cell-matrix adhesion (GO:0007160)	137	21	3.48	+	6.03	4.05e-11	1.82e-08
chondrocyte differentiation (GO:0002062)	85	13	2.16	+	6.02	2.21e-07	3.38e-05
semaphorin-plexin signaling pathway (GO:0071526)	46	7	1.17	+	5.99	0.000149	0.00843
autonomic nervous system development (GO:0048483)	46	7	1.17	+	5.99	0.000149	0.0084
substrate adhesion-dependent cell spreading (GO:0034446)	46	7	1.17	+	5.99	0.000149	0.00837
face morphogenesis (GO:0060325)	33	5	0.84	+	5.96	0.00137	0.0494
regulation of cellular response to vascular endothelial growth factor stimulus (GO:1902547)	33	5	0.84	+	5.96	0.00137	0.0493
insulin-like growth factor receptor signaling pathway (GO:0048009)	33	5	0.84	+	5.96	0.00137	0.0492
artery development (GO:0060840)	106	16	2.69	+	5.94	1.08e-08	2.62e-06
face development (GO:0060324)	54	8	1.37	+	5.83	6.14e-05	0.00402
regulation of extracellular matrix organization (GO:1903053)	61	9	1.55	+	5.81	2.21e-05	0.00168
glomerulus development (GO:0032835)	61	9	1.55	+	5.81	2.21e-05	0.00167
regulation of morphogenesis of an epithelium (GO:1905330)	68	10	1.73	+	5.79	7.99e-06	0.000722
formation of primary germ layer (GO:0001704)	123	18	3.13	+	5.76	2.18e-09	6.08e-07
regulation of smooth muscle cell migration (GO:0014910)	63	9	1.6	+	5.62	2.88e-05	0.00213
endoderm development (GO:0007492)	85	12	2.16	+	5.56	1.56e-06	0.000175
neural crest cell migration (GO:0001755)	57	8	1.45	+	5.52	9.12e-05	0.00558
lipoprotein biosynthetic process (GO:0042158)	43	6	1.09	+	5.49	0.000718	0.0297
negative regulation of chemotaxis (GO:0050922)	44	6	1.12	+	5.37	0.000814	0.0329
negative chemotaxis (GO:0050919)	44	6	1.12	+	5.37	0.000814	0.0328
mesenchymal cell migration (GO:0090497)	59	8	1.5	+	5.34	0.000117	0.00699
cell-substrate adhesion (GO:0031589)	185	25	4.7	+	5.32	9.81e-12	4.69e-09
endocardial cushion development (GO:0003197)	52	7	1.32	+	5.3	0.000327	0.0155
regulation of cell-substrate junction organization (GO:0150116)	69	9	1.75	+	5.13	6.03e-05	0.00397
regulation of chondrocyte differentiation (GO:0032330)	54	7	1.37	+	5.1	0.000414	0.0192
negative regulation of endothelial cell migration (GO:0010596)	55	7	1.4	+	5.01	0.000464	0.0208
regulation of morphogenesis of a branching structure (GO:0060688)	55	7	1.4	+	5.01	0.000464	0.0208
gastrulation (GO:0007369)	173	22	4.4	+	5	5.7e-10	1.88e-07
aorta development (GO:0035904)	63	8	1.6	+	5	0.000187	0.0101
regulation of organic acid transport (GO:0032890)	71	9	1.8	+	4.99	7.58e-05	0.00486
mesoderm formation (GO:0001707)	71	9	1.8	+	4.99	7.58e-05	0.00484
regulation of focal adhesion assembly (GO:0051893)	64	8	1.63	+	4.92	0.000209	0.011
axon extension (GO:0048675)	48	6	1.22	+	4.92	0.0013	0.0474
regulation of cell-substrate junction assembly (GO:0090109)	64	8	1.63	+	4.92	0.000209	0.0109
outflow tract morphogenesis (GO:0003151)	81	10	2.06	+	4.86	3.84e-05	0.00271
mesoderm morphogenesis (GO:0048332)	73	9	1.86	+	4.85	9.45e-05	0.00576
integrin-mediated signaling pathway (GO:0007229)	98	12	2.49	+	4.82	7.15e-06	0.000654
regulation of endothelial cell migration (GO:0010594)	172	21	4.37	+	4.8	2.97e-09	8.16e-07
regulation of cell-matrix adhesion (GO:0001952)	123	15	3.13	+	4.8	5.5e-07	7.08e-05
regulation of cartilage development (GO:0061035)	74	9	1.88	+	4.79	0.000105	0.00636
protein O-linked glycosylation (GO:0006493)	100	12	2.54	+	4.72	8.83e-06	0.000778
regulation of SMAD protein signal transduction (GO:0060390)	67	8	1.7	+	4.7	0.000288	0.0142
collagen metabolic process (GO:0032963)	67	8	1.7	+	4.7	0.000288	0.0141
regulation of animal organ morphogenesis (GO:2000027)	84	10	2.13	+	4.68	5.28e-05	0.00351
regulation of cell-substrate adhesion (GO:0010810)	219	26	5.57	+	4.67	7.28e-11	3e-08
developmental growth involved in morphogenesis (GO:0060560)	144	17	3.66	+	4.65	1.57e-07	2.5e-05
transforming growth factor beta receptor signaling pathway (GO:0007179)	103	12	2.62	+	4.58	1.2e-05	0.001
proteoglycan biosynthetic process (GO:0030166)	78	9	1.98	+	4.54	0.000159	0.00874
cardiac ventricle development (GO:0003231)	132	15	3.35	+	4.47	1.37e-06	0.000156
cardiac chamber morphogenesis (GO:0003206)	133	15	3.38	+	4.44	1.51e-06	0.000171
cartilage development (GO:0051216)	179	20	4.55	+	4.4	3.25e-08	6.97e-06
regulation of bone mineralization (GO:0030500)	81	9	2.06	+	4.37	0.000212	0.0111
regulation of lymphocyte apoptotic process (GO:0070228)	63	7	1.6	+	4.37	0.00106	0.0407
cardiac ventricle morphogenesis (GO:0003208)	72	8	1.83	+	4.37	0.000474	0.0211
positive regulation of endothelial cell migration (GO:0010595)	109	12	2.77	+	4.33	2.14e-05	0.00164
positive regulation of smooth muscle cell proliferation (GO:0048661)	82	9	2.08	+	4.32	0.000233	0.012
positive regulation of cell-substrate adhesion (GO:0010811)	128	14	3.25	+	4.3	4.84e-06	0.000468
cardiac chamber development (GO:0003205)	175	19	4.45	+	4.27	1.13e-07	1.85e-05
regulation of stress fiber assembly (GO:0051492)	93	10	2.36	+	4.23	0.000126	0.00732
response to transforming growth factor beta (GO:0071559)	161	17	4.09	+	4.15	7.82e-07	9.57e-05
cardiac septum morphogenesis (GO:0060411)	76	8	1.93	+	4.14	0.000683	0.0284
regulation of endothelial cell proliferation (GO:0001936)	134	14	3.41	+	4.11	8.27e-06	0.000738
cellular response to transforming growth factor beta stimulus (GO:0071560)	154	16	3.91	+	4.09	2.04e-06	0.000214
proteoglycan metabolic process (GO:0006029)	106	11	2.69	+	4.08	8.1e-05	0.00513
developmental cell growth (GO:0048588)	116	12	2.95	+	4.07	4e-05	0.00277
negative regulation of transforming growth factor beta receptor signaling pathway (GO:0030512)	97	10	2.47	+	4.06	0.000179	0.00976
regulation of smooth muscle cell proliferation (GO:0048660)	136	14	3.46	+	4.05	9.82e-06	0.000856
negative regulation of cellular response to growth factor stimulus (GO:0090288)	107	11	2.72	+	4.05	8.83e-05	0.0055
blood vessel morphogenesis (GO:0048514)	442	45	11.23	+	4.01	2.3e-15	1.89e-12
cell growth (GO:0016049)	118	12	3	+	4	4.74e-05	0.00322
vasculature development (GO:0001944)	561	57	14.26	+	4	3.63e-19	7.68e-16
blood vessel development (GO:0001568)	537	54	13.65	+	3.96	5.3e-18	7.86e-15
neural crest cell development (GO:0014032)	80	8	2.03	+	3.93	0.000962	0.0372
angiogenesis (GO:0001525)	351	35	8.92	+	3.92	5.95e-12	3.04e-09
ameboidal-type cell migration (GO:0001667)	141	14	3.58	+	3.91	1.49e-05	0.00119
regulation of biomineral tissue development (GO:0070167)	102	10	2.59	+	3.86	0.000271	0.0134
positive regulation of endothelial cell proliferation (GO:0001938)	92	9	2.34	+	3.85	0.000553	0.0238
respiratory system development (GO:0060541)	225	22	5.72	+	3.85	7.58e-08	1.32e-05
cardiac septum development (GO:0003279)	113	11	2.87	+	3.83	0.000145	0.00824
regulation of transforming growth factor beta receptor signaling pathway (GO:0017015)	144	14	3.66	+	3.83	1.89e-05	0.00147
regulation of actomyosin structure organization (GO:0110020)	103	10	2.62	+	3.82	0.000294	0.0144
neural crest cell differentiation (GO:0014033)	93	9	2.36	+	3.81	0.000598	0.0256
lung development (GO:0030324)	197	19	5.01	+	3.8	7.22e-07	8.99e-05
response to activity (GO:0014823)	83	8	2.11	+	3.79	0.00122	0.0453
limb morphogenesis (GO:0035108)	156	15	3.96	+	3.78	1.1e-05	0.000928
appendage morphogenesis (GO:0035107)	156	15	3.96	+	3.78	1.1e-05	0.000923
glycoprotein biosynthetic process (GO:0009101)	281	27	7.14	+	3.78	3.66e-09	9.87e-07
regulation of cellular response to transforming growth factor beta stimulus (GO:1903844)	147	14	3.74	+	3.75	2.39e-05	0.00179
regulation of ossification (GO:0030278)	126	12	3.2	+	3.75	9.02e-05	0.00557
neuron projection extension (GO:1990138)	84	8	2.13	+	3.75	0.00132	0.0481
negative regulation of epithelial cell proliferation (GO:0050680)	137	13	3.48	+	3.73	4.82e-05	0.00326
respiratory tube development (GO:0030323)	201	19	5.11	+	3.72	9.81e-07	0.000117
regulation of actin filament bundle assembly (GO:0032231)	106	10	2.69	+	3.71	0.000371	0.0172
negative regulation of locomotion (GO:0040013)	330	31	8.39	+	3.7	4.4e-10	1.48e-07
regulation of cellular response to growth factor stimulus (GO:0090287)	325	30	8.26	+	3.63	1.28e-09	3.88e-07
negative regulation of transmembrane receptor protein serine/threonine kinase signaling pathway (GO:0090101)	153	14	3.89	+	3.6	3.73e-05	0.00267
heart morphogenesis (GO:0003007)	263	24	6.68	+	3.59	7.29e-08	1.32e-05
negative regulation of cell adhesion (GO:0007162)	297	27	7.55	+	3.58	1.2e-08	2.88e-06
regulation of systemic arterial blood pressure (GO:0003073)	111	10	2.82	+	3.55	0.000536	0.0231
epithelial cell proliferation (GO:0050673)	189	17	4.8	+	3.54	7.09e-06	0.000657
mesenchyme development (GO:0060485)	248	22	6.3	+	3.49	4.16e-07	5.65e-05
negative regulation of cell migration (GO:0030336)	298	26	7.57	+	3.43	5.18e-08	9.71e-06
negative regulation of cell motility (GO:2000146)	313	27	7.95	+	3.39	3.63e-08	7.36e-06
female sex differentiation (GO:0046660)	116	10	2.95	+	3.39	0.000758	0.0308
mesenchymal cell differentiation (GO:0048762)	174	15	4.42	+	3.39	4e-05	0.00278
glycoprotein metabolic process (GO:0009100)	348	30	8.84	+	3.39	6.37e-09	1.63e-06
connective tissue development (GO:0061448)	244	21	6.2	+	3.39	1.24e-06	0.000144
axon guidance (GO:0007411)	233	20	5.92	+	3.38	2.32e-06	0.000237
nephron development (GO:0072006)	140	12	3.56	+	3.37	0.000245	0.0125
neuron projection guidance (GO:0097485)	234	20	5.95	+	3.36	2.48e-06	0.000251
regulation of blood pressure (GO:0008217)	199	17	5.06	+	3.36	1.4e-05	0.00114
positive regulation of angiogenesis (GO:0045766)	164	14	4.17	+	3.36	7.99e-05	0.00508
renal system development (GO:0072001)	317	27	8.06	+	3.35	4.72e-08	9.08e-06
negative regulation of neuron projection development (GO:0010977)	130	11	3.3	+	3.33	0.000491	0.0218
wound healing (GO:0042060)	334	28	8.49	+	3.3	3.73e-08	7.47e-06
blood vessel diameter maintenance (GO:0097746)	156	13	3.96	+	3.28	0.000181	0.00984
regulation of tube diameter (GO:0035296)	156	13	3.96	+	3.28	0.000181	0.0098
positive regulation of vasculature development (GO:1904018)	168	14	4.27	+	3.28	0.000103	0.00628
regulation of tube size (GO:0035150)	157	13	3.99	+	3.26	0.000193	0.0103
protein glycosylation (GO:0006486)	218	18	5.54	+	3.25	1.26e-05	0.00105
macromolecule glycosylation (GO:0043413)	218	18	5.54	+	3.25	1.26e-05	0.00104
limb development (GO:0060173)	194	16	4.93	+	3.25	3.84e-05	0.00273
appendage development (GO:0048736)	194	16	4.93	+	3.25	3.84e-05	0.00272
eye morphogenesis (GO:0048592)	171	14	4.35	+	3.22	0.000125	0.00732
cell surface receptor protein tyrosine kinase signaling pathway (GO:0007169)	432	35	10.98	+	3.19	1.77e-09	5.15e-07
embryonic skeletal system development (GO:0048706)	136	11	3.46	+	3.18	0.000719	0.0297
epithelial cell development (GO:0002064)	199	16	5.06	+	3.16	5.22e-05	0.00348
regulation of transmembrane receptor protein serine/threonine kinase signaling pathway (GO:0090092)	274	22	6.96	+	3.16	2.22e-06	0.00023
circulatory system development (GO:0072359)	950	76	24.14	+	3.15	4.25e-19	7.87e-16
kidney epithelium development (GO:0072073)	139	11	3.53	+	3.11	0.000861	0.0341
tube morphogenesis (GO:0035239)	700	55	17.79	+	3.09	1.09e-13	6.43e-11
kidney development (GO:0001822)	306	24	7.78	+	3.09	1.17e-06	0.000138
response to insulin (GO:0032868)	218	17	5.54	+	3.07	4.52e-05	0.00309
transforming growth factor beta receptor superfamily signaling pathway (GO:0141091)	180	14	4.57	+	3.06	0.000214	0.0111
cell surface receptor protein serine/threonine kinase signaling pathway (GO:0007178)	193	15	4.9	+	3.06	0.00013	0.00746
regulation of angiogenesis (GO:0045765)	296	23	7.52	+	3.06	2.29e-06	0.000236
response to wounding (GO:0009611)	451	35	11.46	+	3.05	5.43e-09	1.41e-06
enzyme-linked receptor protein signaling pathway (GO:0007167)	636	49	16.16	+	3.03	5.34e-12	2.83e-09
regulation of muscle cell differentiation (GO:0051147)	143	11	3.63	+	3.03	0.00109	0.0415
vascular process in circulatory system (GO:0003018)	275	21	6.99	+	3	8.21e-06	0.000737
regulation of cell adhesion (GO:0030155)	801	61	20.36	+	3	1.79e-14	1.32e-11
regulation of vasculature development (GO:1901342)	303	23	7.7	+	2.99	3.39e-06	0.000331
glycosylation (GO:0070085)	238	18	6.05	+	2.98	4.08e-05	0.00281
regulation of cell migration (GO:0030334)	958	72	24.35	+	2.96	1.18e-16	1.24e-13
circulatory system process (GO:0003013)	522	39	13.27	+	2.94	2.08e-09	5.94e-07
blood circulation (GO:0008015)	431	32	10.95	+	2.92	6.97e-08	1.28e-05
regulation of cell motility (GO:2000145)	1017	75	25.85	+	2.9	7.06e-17	8.05e-14
regulation of locomotion (GO:0040012)	1059	78	26.91	+	2.9	1.66e-17	2.24e-14
growth (GO:0040007)	462	34	11.74	+	2.9	3.35e-08	7.09e-06
developmental growth (GO:0048589)	462	34	11.74	+	2.9	3.35e-08	6.99e-06
tube development (GO:0035295)	929	68	23.61	+	2.88	3.41e-15	2.66e-12
anatomical structure formation involved in morphogenesis (GO:0048646)	991	72	25.18	+	2.86	6.97e-16	6.88e-13
cell adhesion (GO:0007155)	965	68	24.52	+	2.77	2.18e-14	1.54e-11
heart development (GO:0007507)	573	40	14.56	+	2.75	8.86e-09	2.19e-06
cell projection morphogenesis (GO:0048858)	516	36	13.11	+	2.75	5.1e-08	9.68e-06
neuron projection morphogenesis (GO:0048812)	504	35	12.81	+	2.73	8.79e-08	1.51e-05
positive regulation of epithelial cell proliferation (GO:0050679)	202	14	5.13	+	2.73	0.000688	0.0285
cellular response to growth factor stimulus (GO:0071363)	478	33	12.15	+	2.72	2.37e-07	3.51e-05
axonogenesis (GO:0007409)	378	26	9.61	+	2.71	4.85e-06	0.000467
plasma membrane bounded cell projection morphogenesis (GO:0120039)	509	35	12.94	+	2.71	1.12e-07	1.84e-05
positive regulation of cell migration (GO:0030335)	553	38	14.05	+	2.7	3.2e-08	6.98e-06
regulation of cell junction assembly (GO:1901888)	269	18	6.84	+	2.63	0.000194	0.0103
response to growth factor (GO:0070848)	509	34	12.94	+	2.63	3.35e-07	4.68e-05
skin development (GO:0043588)	287	19	7.29	+	2.61	0.000149	0.00835
regulation of epithelial cell proliferation (GO:0050678)	363	24	9.22	+	2.6	2.14e-05	0.00164
positive regulation of cell motility (GO:2000147)	579	38	14.71	+	2.58	1.06e-07	1.78e-05
positive regulation of locomotion (GO:0040017)	595	39	15.12	+	2.58	7.38e-08	1.3e-05
tissue morphogenesis (GO:0048729)	580	38	14.74	+	2.58	1.1e-07	1.84e-05
cell morphogenesis involved in neuron differentiation (GO:0048667)	461	30	11.72	+	2.56	2.82e-06	0.000282
carbohydrate derivative biosynthetic process (GO:1901137)	556	36	14.13	+	2.55	3.2e-07	4.55e-05
axon development (GO:0061564)	434	28	11.03	+	2.54	7.1e-06	0.000653
negative regulation of developmental process (GO:0051093)	934	60	23.74	+	2.53	6.02e-11	2.55e-08
skeletal system development (GO:0001501)	514	33	13.06	+	2.53	1.2e-06	0.00014
positive regulation of cell adhesion (GO:0045785)	499	32	12.68	+	2.52	1.79e-06	0.000197
negative regulation of response to external stimulus (GO:0032102)	394	25	10.01	+	2.5	2.89e-05	0.00212
regulation of body fluid levels (GO:0050878)	366	23	9.3	+	2.47	6.92e-05	0.00446
negative regulation of multicellular organismal process (GO:0051241)	1136	71	28.87	+	2.46	1.99e-12	1.09e-09
cell morphogenesis (GO:0000902)	724	45	18.4	+	2.45	4e-08	7.91e-06
negative regulation of cell differentiation (GO:0045596)	677	42	17.2	+	2.44	1.26e-07	2.02e-05
muscle tissue development (GO:0060537)	356	22	9.05	+	2.43	0.000126	0.00735
anatomical structure morphogenesis (GO:0009653)	2270	137	57.69	+	2.37	9.16e-23	1.36e-18
regulation of anatomical structure morphogenesis (GO:0022603)	838	50	21.3	+	2.35	2.77e-08	6.22e-06
cell junction assembly (GO:0034329)	303	18	7.7	+	2.34	0.00119	0.0449
reproductive structure development (GO:0048608)	305	18	7.75	+	2.32	0.00123	0.0454
negative regulation of cellular component organization (GO:0051129)	699	41	17.76	+	2.31	8.77e-07	0.000106
regulation of small GTPase mediated signal transduction (GO:0051056)	310	18	7.88	+	2.28	0.00136	0.0493
reproductive system development (GO:0061458)	310	18	7.88	+	2.28	0.00136	0.0492
animal organ morphogenesis (GO:0009887)	986	57	25.06	+	2.27	8.26e-09	2.07e-06
embryonic morphogenesis (GO:0048598)	608	35	15.45	+	2.27	8.8e-06	0.000781
striated muscle tissue development (GO:0014706)	337	19	8.56	+	2.22	0.00124	0.0456
cell-cell adhesion (GO:0098609)	550	31	13.98	+	2.22	4.26e-05	0.00292
carbohydrate derivative metabolic process (GO:1901135)	895	50	22.74	+	2.2	1.84e-07	2.86e-05
cellular response to endogenous stimulus (GO:0071495)	936	52	23.79	+	2.19	1.7e-07	2.68e-05
tissue development (GO:0009888)	1800	100	45.74	+	2.19	7.09e-14	4.37e-11
neuron projection development (GO:0031175)	725	40	18.42	+	2.17	5.23e-06	0.0005
response to peptide hormone (GO:0043434)	381	21	9.68	+	2.17	0.000857	0.034
muscle structure development (GO:0061061)	530	29	13.47	+	2.15	0.000115	0.00691
regulation of neuron projection development (GO:0010975)	439	24	11.16	+	2.15	0.000534	0.0232
cell migration (GO:0016477)	941	51	23.91	+	2.13	3.65e-07	5.05e-05
supramolecular fiber organization (GO:0097435)	609	33	15.48	+	2.13	5.92e-05	0.00391
regulation of multicellular organismal development (GO:2000026)	1405	76	35.71	+	2.13	3.45e-10	1.22e-07
gland development (GO:0048732)	426	23	10.83	+	2.12	0.000806	0.0326
morphogenesis of an epithelium (GO:0002009)	464	25	11.79	+	2.12	0.00045	0.0205
eye development (GO:0001654)	415	22	10.55	+	2.09	0.00127	0.0464
embryo development (GO:0009790)	1078	57	27.4	+	2.08	2.29e-07	3.43e-05
negative regulation of cell population proliferation (GO:0008285)	703	37	17.87	+	2.07	3.95e-05	0.00278
cell junction organization (GO:0034330)	571	30	14.51	+	2.07	0.000201	0.0106
visual system development (GO:0150063)	419	22	10.65	+	2.07	0.00138	0.0493
negative regulation of immune system process (GO:0002683)	543	28	13.8	+	2.03	0.000432	0.0198
intracellular signaling cassette (GO:0141124)	847	43	21.52	+	2	1.69e-05	0.00133
cellular response to hormone stimulus (GO:0032870)	537	27	13.65	+	1.98	0.000744	0.0306
negative regulation of response to stimulus (GO:0048585)	1732	87	44.02	+	1.98	6.91e-10	2.18e-07
neuron development (GO:0048666)	898	45	22.82	+	1.97	1.69e-05	0.00133
cellular response to lipid (GO:0071396)	540	27	13.72	+	1.97	0.00117	0.0447
regulation of cell differentiation (GO:0045595)	1563	77	39.72	+	1.94	2.04e-08	4.65e-06
negative regulation of signal transduction (GO:0009968)	1384	68	35.17	+	1.93	1.86e-07	2.88e-05
system development (GO:0048731)	3629	178	92.22	+	1.93	6.34e-20	1.56e-16
response to endogenous stimulus (GO:0009719)	1205	59	30.62	+	1.93	1.65e-06	0.000184
multicellular organism development (GO:0007275)	4029	196	102.39	+	1.91	5.67e-22	1.68e-18
import into cell (GO:0098657)	701	34	17.81	+	1.91	0.000332	0.0157
regulation of cell population proliferation (GO:0042127)	1659	80	42.16	+	1.9	3.14e-08	6.93e-06
regulation of developmental process (GO:0050793)	2457	118	62.44	+	1.89	6.3e-12	3.11e-09
cellular response to oxygen-containing compound (GO:1901701)	1063	51	27.01	+	1.89	1.31e-05	0.00107
sensory organ development (GO:0007423)	626	30	15.91	+	1.89	0.00105	0.0404
animal organ development (GO:0048513)	2904	138	73.8	+	1.87	6.94e-14	4.47e-11
positive regulation of developmental process (GO:0051094)	1328	63	33.75	+	1.87	1.99e-06	0.000211
neurogenesis (GO:0022008)	1413	67	35.91	+	1.87	7.02e-07	8.82e-05
negative regulation of cell communication (GO:0010648)	1480	70	37.61	+	1.86	4.66e-07	6.17e-05
negative regulation of signaling (GO:0023057)	1481	70	37.64	+	1.86	4.72e-07	6.19e-05
response to oxygen-containing compound (GO:1901700)	1550	73	39.39	+	1.85	3.3e-07	4.65e-05
cell motility (GO:0048870)	1172	55	29.78	+	1.85	1.3e-05	0.00107
plasma membrane bounded cell projection organization (GO:0120036)	1194	56	30.34	+	1.85	1.01e-05	0.000876
embryo development ending in birth or egg hatching (GO:0009792)	710	33	18.04	+	1.83	0.000908	0.0353
response to hormone (GO:0009725)	797	37	20.25	+	1.83	0.000482	0.0215
chordate embryonic development (GO:0043009)	691	32	17.56	+	1.82	0.0012	0.0452
positive regulation of signaling (GO:0023056)	1797	83	45.67	+	1.82	1.01e-07	1.72e-05
positive regulation of signal transduction (GO:0009967)	1605	74	40.79	+	1.81	5.35e-07	6.95e-05
neuron differentiation (GO:0030182)	1138	52	28.92	+	1.8	4e-05	0.0028
cell projection organization (GO:0030030)	1248	57	31.72	+	1.8	1.65e-05	0.0013
intracellular signal transduction (GO:0035556)	1778	81	45.18	+	1.79	2.23e-07	3.37e-05
cell population proliferation (GO:0008283)	747	34	18.98	+	1.79	0.0012	0.0451
negative regulation of programmed cell death (GO:0043069)	923	42	23.46	+	1.79	0.000249	0.0124
epithelium development (GO:0060429)	1129	51	28.69	+	1.78	8.26e-05	0.00516
positive regulation of cell population proliferation (GO:0008284)	930	42	23.63	+	1.78	0.000369	0.0172
generation of neurons (GO:0048699)	1218	55	30.95	+	1.78	3.17e-05	0.00231
positive regulation of cell communication (GO:0010647)	1795	81	45.62	+	1.78	3.73e-07	5.11e-05
negative regulation of apoptotic process (GO:0043066)	888	40	22.57	+	1.77	0.000442	0.0202
positive regulation of cell differentiation (GO:0045597)	869	39	22.08	+	1.77	0.000576	0.0247
regulation of multicellular organismal process (GO:0051239)	2972	133	75.53	+	1.76	2.13e-11	9.87e-09
positive regulation of multicellular organismal process (GO:0051240)	1661	74	42.21	+	1.75	1.93e-06	0.000207
cellular response to chemical stimulus (GO:0070887)	1959	85	49.78	+	1.71	1.07e-06	0.000126
regulation of signal transduction (GO:0009966)	3101	134	78.81	+	1.7	2.55e-10	9.46e-08
positive regulation of transcription by RNA polymerase II (GO:0045944)	1250	54	31.77	+	1.7	0.000129	0.00746
positive regulation of intracellular signal transduction (GO:1902533)	1135	49	28.84	+	1.7	0.000294	0.0143
regulation of signaling (GO:0023051)	3541	150	89.99	+	1.67	4.63e-11	2.02e-08
cell surface receptor signaling pathway (GO:0007166)	2124	89	53.98	+	1.65	1.91e-06	0.000207
anatomical structure development (GO:0048856)	5304	222	134.79	+	1.65	5.95e-17	7.34e-14
regulation of cell communication (GO:0010646)	3546	148	90.11	+	1.64	2.31e-10	8.77e-08
regulation of transport (GO:0051049)	1599	66	40.64	+	1.62	9.02e-05	0.00555
cellular developmental process (GO:0048869)	3755	154	95.43	+	1.61	2.8e-10	1.01e-07
regulation of programmed cell death (GO:0043067)	1513	62	38.45	+	1.61	0.000175	0.00959
cell differentiation (GO:0030154)	3752	153	95.35	+	1.6	5.83e-10	1.88e-07
cell development (GO:0048468)	2307	94	58.63	+	1.6	3.15e-06	0.000309
positive regulation of response to stimulus (GO:0048584)	2296	93	58.35	+	1.59	5.71e-06	0.000543
regulation of intracellular signal transduction (GO:1902531)	2005	81	50.95	+	1.59	2.57e-05	0.00192
negative regulation of biological process (GO:0048519)	5248	212	133.37	+	1.59	2.88e-14	1.94e-11
negative regulation of cellular process (GO:0048523)	5027	203	127.75	+	1.59	1.48e-13	8.41e-11
nervous system development (GO:0007399)	2279	92	57.92	+	1.59	7.47e-06	0.000679
regulation of apoptotic process (GO:0042981)	1465	59	37.23	+	1.58	0.000519	0.0229
multicellular organismal process (GO:0032501)	6408	258	162.85	+	1.58	1.8e-18	2.96e-15
developmental process (GO:0032502)	5830	233	148.16	+	1.57	1.25e-15	1.16e-12
positive regulation of DNA-templated transcription (GO:0045893)	1680	67	42.69	+	1.57	0.000247	0.0124
positive regulation of RNA biosynthetic process (GO:1902680)	1682	67	42.74	+	1.57	0.00025	0.0125
regulation of localization (GO:0032879)	2010	80	51.08	+	1.57	5.06e-05	0.0034
regulation of biological quality (GO:0065008)	3003	119	76.32	+	1.56	4.4e-07	5.93e-05
regulation of cellular component organization (GO:0051128)	2486	97	63.18	+	1.54	1.64e-05	0.00131
regulation of response to stimulus (GO:0048583)	4107	158	104.37	+	1.51	1.74e-08	4.02e-06
response to chemical (GO:0042221)	3714	140	94.38	+	1.48	6.28e-07	8.02e-05
positive regulation of biological process (GO:0048518)	6113	222	155.35	+	1.43	4.23e-10	1.46e-07
positive regulation of cellular process (GO:0048522)	5813	209	147.73	+	1.41	5.33e-09	1.41e-06
signal transduction (GO:0007165)	4942	175	125.59	+	1.39	7.59e-07	9.37e-05
positive regulation of macromolecule biosynthetic process (GO:0010557)	2554	90	64.9	+	1.39	0.00122	0.0458
signaling (GO:0023052)	5282	183	134.23	+	1.36	1.71e-06	0.000189
cellular response to stimulus (GO:0051716)	6478	224	164.63	+	1.36	3.57e-08	7.35e-06
cell communication (GO:0007154)	5328	184	135.4	+	1.36	1.85e-06	0.000202
cellular component organization (GO:0016043)	5717	197	145.29	+	1.36	6.9e-07	8.74e-05
positive regulation of macromolecule metabolic process (GO:0010604)	3138	107	79.75	+	1.34	0.00131	0.0478
positive regulation of metabolic process (GO:0009893)	3458	117	87.88	+	1.33	0.000882	0.0344
cellular component organization or biogenesis (GO:0071840)	5931	200	150.72	+	1.33	3.11e-06	0.000308
establishment of localization (GO:0051234)	4006	133	101.8	+	1.31	0.000766	0.0311
response to stimulus (GO:0050896)	8280	274	210.42	+	1.3	1.42e-08	3.34e-06
localization (GO:0051179)	4549	149	115.6	+	1.29	0.000511	0.0226
regulation of cellular process (GO:0050794)	11417	345	290.14	+	1.19	8.75e-07	0.000106
regulation of biological process (GO:0050789)	11815	357	300.25	+	1.19	2.97e-07	4.28e-05
biological regulation (GO:0065007)	12219	367	310.52	+	1.18	2.48e-07	3.64e-05
cellular process (GO:0009987)	15563	467	395.5	+	1.18	1.43e-15	1.25e-12
biological_process (GO:0008150)	17724	496	450.42	+	1.1	9.17e-11	3.58e-08
Unclassified (UNCLASSIFIED)	2856	27	72.58	-	0.37	9.17e-11	3.67e-08
sensory perception (GO:0007600)	1002	9	25.46	-	0.35	0.000189	0.0101
ribonucleoprotein complex biogenesis (GO:0022613)	453	2	11.51	-	0.17	0.00127	0.0463
detection of stimulus involved in sensory perception (GO:0050906)	564	2	14.33	-	0.14	0.000106	0.00638
sensory perception of smell (GO:0007608)	472	1	11.99	-	0.08	0.000146	0.00827
sensory perception of chemical stimulus (GO:0007606)	551	1	14	-	0.07	1.43e-05	0.00115
detection of chemical stimulus involved in sensory perception of smell (GO:0050911)	440	0	11.18	-	< 0.01	1.98e-05	0.00153
detection of chemical stimulus involved in sensory perception (GO:0050907)	487	0	12.38	-	< 0.01	6.12e-06	0.00057

## Sheet: GSF-S_down-regulated
Analysis Type:	PANTHER Overrepresentation Test (Released 20240807)
Annotation Version and Release Date:	GO Ontology database DOI: 10.5281/zenodo.15066566 Released 2025-03-16
Analyzed List:	Client Text Box Input (Homo sapiens)
Reference List:	Homo sapiens (all genes in database)
Test Type:	FISHER
Correction:	FDR
GO biological process complete	Homo sapiens - REFLIST (20580)	Client Text Box Input (609)	Client Text Box Input (expected)	Client Text Box Input (over/under)	Client Text Box Input (fold Enrichment)	Client Text Box Input (raw P-value)	Client Text Box Input (FDR)
neurotransmitter receptor transport, postsynaptic endosome to lysosome (GO:0098943)	2	2	0.06	+	33.79	0.000874	0.0265
positive regulation of protein processing in phagocytic vesicle (GO:1903923)	2	2	0.06	+	33.79	0.000874	0.0265
regulation of protein processing in phagocytic vesicle (GO:1903921)	2	2	0.06	+	33.79	0.000874	0.0264
long-chain fatty acid import across plasma membrane (GO:0015911)	4	3	0.12	+	25.34	0.000101	0.00519
low-density lipoprotein particle mediated signaling (GO:0055096)	4	3	0.12	+	25.34	0.000101	0.00517
angiogenesis involved in coronary vascular morphogenesis (GO:0060978)	4	3	0.12	+	25.34	0.000101	0.00515
lipoprotein particle mediated signaling (GO:0055095)	5	3	0.15	+	20.28	0.000247	0.0107
maintenance of protein location in mitochondrion (GO:0072656)	5	3	0.15	+	20.28	0.000247	0.0107
thyroid-stimulating hormone-secreting cell differentiation (GO:0060129)	6	3	0.18	+	16.9	0.000482	0.0174
positive regulation of focal adhesion disassembly (GO:0120183)	6	3	0.18	+	16.9	0.000482	0.0173
regulation of focal adhesion disassembly (GO:0120182)	6	3	0.18	+	16.9	0.000482	0.0173
asymmetric neuroblast division (GO:0055059)	6	3	0.18	+	16.9	0.000482	0.0173
positive regulation of dephosphorylation (GO:0035306)	6	3	0.18	+	16.9	0.000482	0.0172
metanephric glomerulus vasculature development (GO:0072239)	7	3	0.21	+	14.48	0.000826	0.0254
interleukin-11-mediated signaling pathway (GO:0038154)	7	3	0.21	+	14.48	0.000826	0.0254
positive regulation of lamellipodium morphogenesis (GO:2000394)	7	3	0.21	+	14.48	0.000826	0.0253
locomotion involved in locomotory behavior (GO:0031987)	7	3	0.21	+	14.48	0.000826	0.0253
cleavage furrow formation (GO:0036089)	7	3	0.21	+	14.48	0.000826	0.0252
actin filament severing (GO:0051014)	15	6	0.44	+	13.52	2.61e-06	0.000232
positive regulation of microtubule nucleation (GO:0090063)	8	3	0.24	+	12.67	0.00129	0.0362
negative regulation of hippo signaling (GO:0035331)	24	9	0.71	+	12.67	1.44e-08	2.48e-06
regulation of lamellipodium morphogenesis (GO:2000392)	11	4	0.33	+	12.29	0.000212	0.00944
regulation of keratinocyte migration (GO:0051547)	14	5	0.41	+	12.07	3.58e-05	0.00214
interleukin-6-mediated signaling pathway (GO:0070102)	14	5	0.41	+	12.07	3.58e-05	0.00213
negative regulation of sodium ion transport (GO:0010766)	14	5	0.41	+	12.07	3.58e-05	0.00212
glomerulus morphogenesis (GO:0072102)	9	3	0.27	+	11.26	0.0019	0.0488
negative regulation of sodium ion transmembrane transport (GO:1902306)	9	3	0.27	+	11.26	0.0019	0.0488
positive regulation of keratinocyte migration (GO:0051549)	12	4	0.36	+	11.26	0.000311	0.0125
negative regulation of myelination (GO:0031642)	9	3	0.27	+	11.26	0.0019	0.0487
positive regulation of cardiac epithelial to mesenchymal transition (GO:0062043)	9	3	0.27	+	11.26	0.0019	0.0486
negative regulation of ferroptosis (GO:0110076)	13	4	0.38	+	10.4	0.000439	0.0164
positive regulation of phagocytosis, engulfment (GO:0060100)	13	4	0.38	+	10.4	0.000439	0.0163
positive regulation of membrane invagination (GO:1905155)	13	4	0.38	+	10.4	0.000439	0.0163
positive regulation of actin filament depolymerization (GO:0030836)	14	4	0.41	+	9.66	0.0006	0.0206
intestinal epithelial cell development (GO:0060576)	14	4	0.41	+	9.66	0.0006	0.0205
T-helper 17 cell differentiation (GO:0072539)	14	4	0.41	+	9.66	0.0006	0.0205
regulation of phagocytosis, engulfment (GO:0060099)	15	4	0.44	+	9.01	0.000799	0.0251
lipid import into cell (GO:0140354)	15	4	0.44	+	9.01	0.000799	0.0251
negative regulation of calcineurin-NFAT signaling cascade (GO:0070885)	15	4	0.44	+	9.01	0.000799	0.025
negative regulation of calcineurin-mediated signaling (GO:0106057)	15	4	0.44	+	9.01	0.000799	0.025
regulation of membrane invagination (GO:1905153)	15	4	0.44	+	9.01	0.000799	0.0249
regulation of hippo signaling (GO:0035330)	42	11	1.24	+	8.85	2.59e-08	4.36e-06
positive regulation of cell migration involved in sprouting angiogenesis (GO:0090050)	23	6	0.68	+	8.82	4.3e-05	0.0025
regulation of early endosome to late endosome transport (GO:2000641)	20	5	0.59	+	8.45	0.000239	0.0105
barbed-end actin filament capping (GO:0051016)	20	5	0.59	+	8.45	0.000239	0.0105
positive regulation of protein depolymerization (GO:1901881)	21	5	0.62	+	8.05	0.000306	0.0124
regulation of ferroptosis (GO:0110075)	17	4	0.5	+	7.95	0.00133	0.0371
negative regulation of epithelial cell migration (GO:0010633)	17	4	0.5	+	7.95	0.00133	0.037
p38MAPK cascade (GO:0038066)	18	4	0.53	+	7.51	0.00167	0.0448
epithelial cell-cell adhesion (GO:0090136)	18	4	0.53	+	7.51	0.00167	0.0447
regulation of receptor clustering (GO:1903909)	18	4	0.53	+	7.51	0.00167	0.0446
regulation of blood vessel endothelial cell proliferation involved in sprouting angiogenesis (GO:1903587)	18	4	0.53	+	7.51	0.00167	0.0446
T-helper 17 type immune response (GO:0072538)	18	4	0.53	+	7.51	0.00167	0.0445
regulation of cell fate specification (GO:0042659)	23	5	0.68	+	7.35	0.000482	0.0172
negative regulation of epidermal growth factor receptor signaling pathway (GO:0042059)	28	6	0.83	+	7.24	0.000142	0.00683
endothelial cell proliferation (GO:0001935)	39	8	1.15	+	6.93	1.54e-05	0.00102
columnar/cuboidal epithelial cell development (GO:0002066)	25	5	0.74	+	6.76	0.000725	0.0233
regulation of superoxide metabolic process (GO:0090322)	30	6	0.89	+	6.76	0.000212	0.00947
axon regeneration (GO:0031103)	25	5	0.74	+	6.76	0.000725	0.0233
host-mediated suppression of symbiont invasion (GO:0046597)	25	5	0.74	+	6.76	0.000725	0.0232
bone resorption (GO:0045453)	26	5	0.77	+	6.5	0.000876	0.0264
regulation of cardiac muscle cell proliferation (GO:0060043)	37	7	1.09	+	6.39	9.13e-05	0.00476
cellular response to fluid shear stress (GO:0071498)	32	6	0.95	+	6.34	0.000308	0.0124
negative regulation of ERBB signaling pathway (GO:1901185)	32	6	0.95	+	6.34	0.000308	0.0124
cardiac epithelial to mesenchymal transition (GO:0060317)	27	5	0.8	+	6.26	0.00105	0.0306
protein refolding (GO:0042026)	27	5	0.8	+	6.26	0.00105	0.0305
positive regulation of heart growth (GO:0060421)	33	6	0.98	+	6.14	0.000367	0.0143
positive regulation of blood vessel endothelial cell migration (GO:0043536)	56	10	1.66	+	6.03	4.99e-06	0.000404
regulation of actin filament depolymerization (GO:0030834)	56	10	1.66	+	6.03	4.99e-06	0.000402
multicellular organismal-level iron ion homeostasis (GO:0060586)	28	5	0.83	+	6.03	0.00125	0.0353
regulation of epithelial cell migration (GO:0010632)	68	12	2.01	+	5.96	6.49e-07	7.12e-05
regulation of cell migration involved in sprouting angiogenesis (GO:0090049)	40	7	1.18	+	5.91	0.000153	0.00724
lamellipodium organization (GO:0097581)	46	8	1.36	+	5.88	5.43e-05	0.00302
positive regulation of receptor internalization (GO:0002092)	29	5	0.86	+	5.83	0.00147	0.0406
positive regulation of cardiac muscle tissue growth (GO:0055023)	29	5	0.86	+	5.83	0.00147	0.0405
regulation of heart growth (GO:0060420)	60	10	1.78	+	5.63	9.51e-06	0.000684
cellular response to interleukin-6 (GO:0071354)	30	5	0.89	+	5.63	0.00172	0.0455
positive regulation of epithelial cell migration (GO:0010634)	48	8	1.42	+	5.63	7.45e-05	0.00399
positive regulation of smooth muscle cell migration (GO:0014911)	36	6	1.07	+	5.63	0.000599	0.0206
myoblast fusion (GO:0007520)	30	5	0.89	+	5.63	0.00172	0.0454
regulation of cardiac muscle tissue growth (GO:0055021)	54	9	1.6	+	5.63	2.66e-05	0.00163
TOR signaling (GO:0031929)	43	7	1.27	+	5.5	0.000245	0.0107
positive regulation of vascular associated smooth muscle cell proliferation (GO:1904707)	37	6	1.09	+	5.48	0.000697	0.0228
lamellipodium assembly (GO:0030032)	37	6	1.09	+	5.48	0.000697	0.0228
negative regulation of JNK cascade (GO:0046329)	37	6	1.09	+	5.48	0.000697	0.0227
regulation of neutrophil migration (GO:1902622)	44	7	1.3	+	5.38	0.000284	0.0119
cellular response to vascular endothelial growth factor stimulus (GO:0035924)	44	7	1.3	+	5.38	0.000284	0.0119
plasma membrane invagination (GO:0099024)	44	7	1.3	+	5.38	0.000284	0.0119
positive regulation of bone mineralization (GO:0030501)	44	7	1.3	+	5.38	0.000284	0.0118
regulation of macrophage cytokine production (GO:0010935)	38	6	1.12	+	5.34	0.000807	0.0251
membrane invagination (GO:0010324)	51	8	1.51	+	5.3	0.000116	0.00577
bone remodeling (GO:0046849)	45	7	1.33	+	5.26	0.000328	0.0131
cortical actin cytoskeleton organization (GO:0030866)	40	6	1.18	+	5.07	0.00107	0.0308
negative regulation of protein localization to nucleus (GO:1900181)	40	6	1.18	+	5.07	0.00107	0.0308
protein localization to lysosome (GO:0061462)	47	7	1.39	+	5.03	0.000432	0.0162
regulation of vascular associated smooth muscle cell proliferation (GO:1904705)	61	9	1.81	+	4.99	7.21e-05	0.00393
regulation of sodium ion transmembrane transport (GO:1902305)	41	6	1.21	+	4.95	0.00122	0.0347
positive regulation of smooth muscle cell proliferation (GO:0048661)	82	12	2.43	+	4.95	5.07e-06	0.000406
negative regulation of actin filament depolymerization (GO:0030835)	41	6	1.21	+	4.95	0.00122	0.0346
regulation of protein depolymerization (GO:1901879)	96	14	2.84	+	4.93	8.72e-07	8.91e-05
glycolytic process (GO:0006096)	48	7	1.42	+	4.93	0.000493	0.0175
response to axon injury (GO:0048678)	55	8	1.63	+	4.92	0.000201	0.00909
pyridine-containing compound catabolic process (GO:0072526)	55	8	1.63	+	4.92	0.000201	0.00906
positive regulation of epithelial to mesenchymal transition (GO:0010718)	56	8	1.66	+	4.83	0.000228	0.0101
response to fluid shear stress (GO:0034405)	42	6	1.24	+	4.83	0.00139	0.0385
regulation of ERBB signaling pathway (GO:1901184)	71	10	2.1	+	4.76	4.35e-05	0.00251
ribonucleoside diphosphate catabolic process (GO:0009191)	57	8	1.69	+	4.74	0.000258	0.0111
negative regulation of smooth muscle cell proliferation (GO:0048662)	50	7	1.48	+	4.73	0.000635	0.0215
regulation of epidermal growth factor receptor signaling pathway (GO:0042058)	65	9	1.92	+	4.68	0.00012	0.00591
ADP metabolic process (GO:0046031)	58	8	1.72	+	4.66	0.000292	0.012
negative regulation of osteoblast differentiation (GO:0045668)	51	7	1.51	+	4.64	0.000718	0.0232
ADP catabolic process (GO:0046032)	51	7	1.51	+	4.64	0.000718	0.0232
iron ion transport (GO:0006826)	51	7	1.51	+	4.64	0.000718	0.0231
regulation of endocrine process (GO:0044060)	44	6	1.3	+	4.61	0.00178	0.0466
regulation of long-term synaptic potentiation (GO:1900271)	44	6	1.3	+	4.61	0.00178	0.0465
dendrite morphogenesis (GO:0048813)	66	9	1.95	+	4.61	0.000135	0.0066
nucleoside diphosphate catabolic process (GO:0009134)	59	8	1.75	+	4.58	0.000329	0.0131
regulation of organ growth (GO:0046620)	89	12	2.63	+	4.56	1.2e-05	0.000829
pyridine nucleotide catabolic process (GO:0019364)	52	7	1.54	+	4.55	0.000809	0.0251
sprouting angiogenesis (GO:0002040)	67	9	1.98	+	4.54	0.000152	0.00723
actin polymerization or depolymerization (GO:0008154)	60	8	1.78	+	4.51	0.00037	0.0144
regulation of receptor internalization (GO:0002090)	76	10	2.25	+	4.45	7.88e-05	0.0042
glomerulus development (GO:0032835)	61	8	1.81	+	4.43	0.000415	0.0157
positive regulation of biomineral tissue development (GO:0070169)	54	7	1.6	+	4.38	0.00102	0.0298
purine ribonucleoside diphosphate catabolic process (GO:0009181)	54	7	1.6	+	4.38	0.00102	0.0298
purine nucleoside diphosphate catabolic process (GO:0009137)	54	7	1.6	+	4.38	0.00102	0.0297
endothelial cell migration (GO:0043542)	86	11	2.54	+	4.32	4.56e-05	0.00259
regulation of blood vessel endothelial cell migration (GO:0043535)	94	12	2.78	+	4.31	2.12e-05	0.00133
regulation of smooth muscle cell migration (GO:0014910)	63	8	1.86	+	4.29	0.000519	0.0182
multicellular organismal-level chemical homeostasis (GO:0140962)	79	10	2.34	+	4.28	0.00011	0.00548
positive regulation of ossification (GO:0045778)	56	7	1.66	+	4.22	0.00127	0.0357
regulation of smooth muscle cell proliferation (GO:0048660)	136	17	4.02	+	4.22	5.76e-07	6.47e-05
receptor internalization (GO:0031623)	72	9	2.13	+	4.22	0.000265	0.0113
cortical cytoskeleton organization (GO:0030865)	56	7	1.66	+	4.22	0.00127	0.0357
phosphatidylinositol phosphate biosynthetic process (GO:0046854)	56	7	1.66	+	4.22	0.00127	0.0356
actomyosin structure organization (GO:0031032)	121	15	3.58	+	4.19	2.94e-06	0.000249
regulation of bone mineralization (GO:0030500)	81	10	2.4	+	4.17	0.000136	0.0066
positive regulation of protein localization to plasma membrane (GO:1903078)	65	8	1.92	+	4.16	0.000642	0.0215
collagen fibril organization (GO:0030199)	65	8	1.92	+	4.16	0.000642	0.0215
negative regulation of intracellular transport (GO:0032387)	57	7	1.69	+	4.15	0.00141	0.039
regulation of sodium ion transport (GO:0002028)	74	9	2.19	+	4.11	0.000327	0.0131
regulation of protein localization to plasma membrane (GO:1903076)	118	14	3.49	+	4.01	1.05e-05	0.000735
positive regulation of protein localization to membrane (GO:1905477)	110	13	3.26	+	3.99	2.25e-05	0.0014
cellular response to amino acid stimulus (GO:0071230)	85	10	2.52	+	3.98	0.000204	0.00917
myofibril assembly (GO:0030239)	68	8	2.01	+	3.98	0.00087	0.0265
negative regulation of cell-substrate adhesion (GO:0010812)	60	7	1.78	+	3.94	0.0019	0.0487
transforming growth factor beta receptor signaling pathway (GO:0007179)	103	12	3.05	+	3.94	5.32e-05	0.00297
nucleoside diphosphate metabolic process (GO:0009132)	86	10	2.54	+	3.93	0.000224	0.00992
positive regulation of reactive oxygen species metabolic process (GO:2000379)	69	8	2.04	+	3.92	0.000959	0.0284
regulation of protein localization to nucleus (GO:1900180)	148	17	4.38	+	3.88	1.91e-06	0.000176
regulation of interleukin-1 beta production (GO:0032651)	96	11	2.84	+	3.87	0.000126	0.0062
purine ribonucleoside diphosphate metabolic process (GO:0009179)	70	8	2.07	+	3.86	0.00106	0.0306
purine nucleoside diphosphate metabolic process (GO:0009135)	70	8	2.07	+	3.86	0.00106	0.0305
regulation of osteoblast differentiation (GO:0045667)	133	15	3.94	+	3.81	9.53e-06	0.000682
positive regulation of osteoblast differentiation (GO:0045669)	71	8	2.1	+	3.81	0.00116	0.033
negative regulation of extrinsic apoptotic signaling pathway (GO:2001237)	98	11	2.9	+	3.79	0.000152	0.00725
negative regulation of protein depolymerization (GO:1901880)	72	8	2.13	+	3.75	0.00127	0.0357
tissue remodeling (GO:0048771)	117	13	3.46	+	3.75	4.34e-05	0.00251
regulation of calcium-mediated signaling (GO:0050848)	99	11	2.93	+	3.75	0.000166	0.00774
ribonucleoside diphosphate metabolic process (GO:0009185)	81	9	2.4	+	3.75	0.000642	0.0214
positive regulation of endothelial cell migration (GO:0010595)	109	12	3.23	+	3.72	9.29e-05	0.00483
positive regulation of protein polymerization (GO:0032273)	91	10	2.69	+	3.71	0.000357	0.014
regulation of protein localization to membrane (GO:1905475)	201	22	5.95	+	3.7	1.43e-07	2e-05
intracellular iron ion homeostasis (GO:0006879)	74	8	2.19	+	3.65	0.00152	0.0416
negative regulation of ERK1 and ERK2 cascade (GO:0070373)	74	8	2.19	+	3.65	0.00152	0.0415
cellular response to acid chemical (GO:0071229)	93	10	2.75	+	3.63	0.000426	0.016
regulation of actin polymerization or depolymerization (GO:0008064)	149	16	4.41	+	3.63	9.13e-06	0.000666
positive regulation of vasculature development (GO:1904018)	168	18	4.97	+	3.62	2.64e-06	0.000231
regulation of epithelial to mesenchymal transition (GO:0010717)	103	11	3.05	+	3.61	0.000236	0.0104
phosphatidylinositol 3-kinase/protein kinase B signal transduction (GO:0043491)	75	8	2.22	+	3.6	0.00166	0.0447
regulation of miRNA transcription (GO:1902893)	75	8	2.22	+	3.6	0.00166	0.0446
regulation of receptor-mediated endocytosis (GO:0048259)	122	13	3.61	+	3.6	6.74e-05	0.00371
negative regulation of protein localization (GO:1903828)	218	23	6.45	+	3.57	1.47e-07	2.03e-05
cellular response to insulin stimulus (GO:0032869)	152	16	4.5	+	3.56	1.18e-05	0.000819
cellular response to interleukin-1 (GO:0071347)	76	8	2.25	+	3.56	0.00181	0.047
regulation of actin filament length (GO:0030832)	152	16	4.5	+	3.56	1.18e-05	0.000815
protein localization to vacuole (GO:0072665)	76	8	2.25	+	3.56	0.00181	0.047
cardiac muscle contraction (GO:0060048)	86	9	2.54	+	3.54	0.000994	0.0293
regulation of protein-containing complex disassembly (GO:0043244)	134	14	3.97	+	3.53	4.45e-05	0.00254
negative regulation of viral process (GO:0048525)	77	8	2.28	+	3.51	0.00197	0.0501
positive regulation of protein localization to cell periphery (GO:1904377)	77	8	2.28	+	3.51	0.00197	0.05
glycosaminoglycan metabolic process (GO:0030203)	77	8	2.28	+	3.51	0.00197	0.0499
positive regulation of angiogenesis (GO:0045766)	164	17	4.85	+	3.5	7.77e-06	0.000584
dendrite development (GO:0016358)	116	12	3.43	+	3.5	0.000169	0.00783
regulation of protein localization to cell periphery (GO:1904375)	155	16	4.59	+	3.49	1.51e-05	0.001
positive regulation of protein-containing complex assembly (GO:0031334)	205	21	6.07	+	3.46	8.28e-07	8.64e-05
vacuolar transport (GO:0007034)	166	17	4.91	+	3.46	9.14e-06	0.000664
columnar/cuboidal epithelial cell differentiation (GO:0002065)	100	10	2.96	+	3.38	0.000759	0.024
transforming growth factor beta receptor superfamily signaling pathway (GO:0141091)	180	18	5.33	+	3.38	7.01e-06	0.000541
positive regulation of cell migration (GO:0030335)	553	55	16.36	+	3.36	3.37e-15	2.17e-12
response to transforming growth factor beta (GO:0071559)	161	16	4.76	+	3.36	2.42e-05	0.0015
response to interleukin-1 (GO:0070555)	101	10	2.99	+	3.35	0.00082	0.0253
regulation of endothelial cell migration (GO:0010594)	172	17	5.09	+	3.34	1.46e-05	0.000976
regulation of reactive oxygen species metabolic process (GO:2000377)	142	14	4.2	+	3.33	8.41e-05	0.00445
heart contraction (GO:0060047)	102	10	3.02	+	3.31	0.000886	0.0267
regulation of biomineral tissue development (GO:0070167)	102	10	3.02	+	3.31	0.000886	0.0266
positive regulation of locomotion (GO:0040017)	595	58	17.61	+	3.29	1.39e-15	1.03e-12
actin filament organization (GO:0007015)	277	27	8.2	+	3.29	6.44e-08	1e-05
cellular response to transforming growth factor beta stimulus (GO:0071560)	154	15	4.56	+	3.29	5.46e-05	0.00303
striated muscle cell differentiation (GO:0051146)	227	22	6.72	+	3.28	1.17e-06	0.000116
cellular response to peptide hormone stimulus (GO:0071375)	258	25	7.63	+	3.27	2.21e-07	2.88e-05
positive regulation of cell motility (GO:2000147)	579	56	17.13	+	3.27	6.22e-15	3.69e-12
positive regulation of chemotaxis (GO:0050921)	145	14	4.29	+	3.26	0.000105	0.00531
regulation of JNK cascade (GO:0046328)	145	14	4.29	+	3.26	0.000105	0.0053
positive regulation of canonical NF-kappaB signal transduction (GO:0043123)	228	22	6.75	+	3.26	1.26e-06	0.000123
positive regulation of supramolecular fiber organization (GO:1902905)	177	17	5.24	+	3.25	2.13e-05	0.00134
heart process (GO:0003015)	115	11	3.4	+	3.23	0.000614	0.0209
regulation of interleukin-1 production (GO:0032652)	115	11	3.4	+	3.23	0.000614	0.0209
neuron apoptotic process (GO:0051402)	116	11	3.43	+	3.2	0.00066	0.0218
cellular response to reactive oxygen species (GO:0034614)	127	12	3.76	+	3.19	0.000394	0.015
cell surface receptor protein serine/threonine kinase signaling pathway (GO:0007178)	193	18	5.71	+	3.15	1.83e-05	0.00118
cellular anatomical entity morphogenesis (GO:0032989)	129	12	3.82	+	3.14	0.000454	0.0167
lysosomal transport (GO:0007041)	129	12	3.82	+	3.14	0.000454	0.0167
regulation of actin filament polymerization (GO:0030833)	129	12	3.82	+	3.14	0.000454	0.0166
cellular component assembly involved in morphogenesis (GO:0010927)	129	12	3.82	+	3.14	0.000454	0.0166
nephron development (GO:0072006)	140	13	4.14	+	3.14	0.000271	0.0115
establishment of cell polarity (GO:0030010)	141	13	4.17	+	3.12	0.000291	0.012
regulation of extrinsic apoptotic signaling pathway (GO:2001236)	163	15	4.82	+	3.11	0.000104	0.00531
regulation of chemotaxis (GO:0050920)	207	19	6.13	+	3.1	1.36e-05	0.000909
response to insulin (GO:0032868)	218	20	6.45	+	3.1	8.16e-06	0.000601
nephron epithelium development (GO:0072009)	109	10	3.23	+	3.1	0.00148	0.0406
response to amino acid (GO:0043200)	121	11	3.58	+	3.07	0.000939	0.0279
positive regulation of cytoskeleton organization (GO:0051495)	188	17	5.56	+	3.06	4.61e-05	0.00261
response to hypoxia (GO:0001666)	289	26	8.55	+	3.04	5.41e-07	6.17e-05
response to acid chemical (GO:0001101)	134	12	3.97	+	3.03	0.000641	0.0215
regulation of protein polymerization (GO:0032271)	201	18	5.95	+	3.03	3.16e-05	0.00191
regulation of leukocyte chemotaxis (GO:0002688)	123	11	3.64	+	3.02	0.00108	0.0309
regulation of vasculature development (GO:1901342)	303	27	8.97	+	3.01	3.97e-07	4.63e-05
response to decreased oxygen levels (GO:0036293)	303	27	8.97	+	3.01	3.97e-07	4.59e-05
supramolecular fiber organization (GO:0097435)	609	54	18.02	+	3	6.66e-13	2.67e-10
actin cytoskeleton organization (GO:0030036)	543	48	16.07	+	2.99	1.51e-11	3.99e-09
response to oxygen levels (GO:0070482)	330	29	9.77	+	2.97	1.98e-07	2.63e-05
regulation of angiogenesis (GO:0045765)	296	26	8.76	+	2.97	8.55e-07	8.79e-05
regulation of cell projection assembly (GO:0060491)	205	18	6.07	+	2.97	4.11e-05	0.0024
cellular response to decreased oxygen levels (GO:0036294)	137	12	4.05	+	2.96	0.00078	0.0246
receptor-mediated endocytosis (GO:0006898)	172	15	5.09	+	2.95	0.00019	0.00866
regulation of cell migration (GO:0030334)	958	83	28.35	+	2.93	8.91e-19	1.32e-15
response to reactive oxygen species (GO:0000302)	174	15	5.15	+	2.91	0.000216	0.00956
regulation of cellular component size (GO:0032535)	360	31	10.65	+	2.91	1.19e-07	1.68e-05
mammary gland development (GO:0030879)	128	11	3.79	+	2.9	0.00149	0.0408
regulation of cytokine production involved in immune response (GO:0002718)	128	11	3.79	+	2.9	0.00149	0.0408
regulation of actin filament-based process (GO:0032970)	396	34	11.72	+	2.9	3.12e-08	5.19e-06
cellular response to growth factor stimulus (GO:0071363)	478	41	14.14	+	2.9	1.19e-09	2.35e-07
regulation of phosphatidylinositol 3-kinase/protein kinase B signal transduction (GO:0051896)	280	24	8.29	+	2.9	3.44e-06	0.000286
regulation of cell shape (GO:0008360)	140	12	4.14	+	2.9	0.000945	0.028
regulation of canonical NF-kappaB signal transduction (GO:0043122)	315	27	9.32	+	2.9	8.51e-07	8.82e-05
cellular response to hypoxia (GO:0071456)	129	11	3.82	+	2.88	0.00158	0.043
regulation of actin cytoskeleton organization (GO:0032956)	352	30	10.42	+	2.88	2.38e-07	3.01e-05
ameboidal-type cell migration (GO:0001667)	141	12	4.17	+	2.88	0.00101	0.0296
cellular response to oxygen levels (GO:0071453)	153	13	4.53	+	2.87	0.000639	0.0216
regulation of interleukin-6 production (GO:0032675)	153	13	4.53	+	2.87	0.000639	0.0215
regulation of wound healing (GO:0061041)	130	11	3.85	+	2.86	0.00169	0.0447
regulation of cell motility (GO:2000145)	1017	86	30.09	+	2.86	8.89e-19	1.46e-15
response to growth factor (GO:0070848)	509	43	15.06	+	2.85	7.42e-10	1.57e-07
regulation of endocytosis (GO:0030100)	308	26	9.11	+	2.85	1.8e-06	0.000167
actin filament-based process (GO:0030029)	617	52	18.26	+	2.85	1.24e-11	3.41e-09
memory (GO:0007613)	131	11	3.88	+	2.84	0.00179	0.0468
striated muscle cell development (GO:0055002)	143	12	4.23	+	2.84	0.00114	0.0325
negative regulation of MAPK cascade (GO:0043409)	167	14	4.94	+	2.83	0.00046	0.0167
regulation of locomotion (GO:0040012)	1059	88	31.34	+	2.81	1.01e-18	1.36e-15
muscle cell differentiation (GO:0042692)	290	24	8.58	+	2.8	6.28e-06	0.000498
regulation of cell-substrate adhesion (GO:0010810)	219	18	6.48	+	2.78	9.68e-05	0.00502
positive regulation of synaptic transmission (GO:0050806)	146	12	4.32	+	2.78	0.00136	0.0378
regulation of actin filament organization (GO:0110053)	269	22	7.96	+	2.76	1.82e-05	0.00118
plasma membrane organization (GO:0007009)	159	13	4.71	+	2.76	0.000916	0.0274
cellular response to metal ion (GO:0071248)	184	15	5.44	+	2.75	0.000394	0.0151
calcium-mediated signaling (GO:0019722)	172	14	5.09	+	2.75	0.000618	0.021
response to peptide hormone (GO:0043434)	381	31	11.27	+	2.75	4.16e-07	4.78e-05
establishment or maintenance of cell polarity (GO:0007163)	209	17	6.18	+	2.75	0.00017	0.00785
positive regulation of kinase activity (GO:0033674)	148	12	4.38	+	2.74	0.00153	0.0416
positive regulation of apoptotic signaling pathway (GO:2001235)	148	12	4.38	+	2.74	0.00153	0.0416
negative regulation of cell projection organization (GO:0031345)	185	15	5.47	+	2.74	0.000417	0.0157
positive regulation of endocytosis (GO:0045807)	161	13	4.76	+	2.73	0.00103	0.03
endocytosis (GO:0006897)	508	41	15.03	+	2.73	7.01e-09	1.25e-06
mesenchyme development (GO:0060485)	248	20	7.34	+	2.73	5.28e-05	0.00296
negative regulation of cell migration (GO:0030336)	298	24	8.82	+	2.72	9.95e-06	0.000709
mesenchymal cell differentiation (GO:0048762)	174	14	5.15	+	2.72	0.000693	0.0228
negative regulation of Wnt signaling pathway (GO:0030178)	174	14	5.15	+	2.72	0.000693	0.0228
negative regulation of cell motility (GO:2000146)	313	25	9.26	+	2.7	7.54e-06	0.000573
angiogenesis (GO:0001525)	351	28	10.39	+	2.7	2.22e-06	0.0002
cell migration (GO:0016477)	941	75	27.85	+	2.69	4.6e-15	2.84e-12
innate immune response-activating signaling pathway (GO:0002758)	151	12	4.47	+	2.69	0.00181	0.047
epithelial cell proliferation (GO:0050673)	189	15	5.59	+	2.68	0.000523	0.0183
regulation of leukocyte migration (GO:0002685)	227	18	6.72	+	2.68	0.000152	0.00724
positive regulation of phosphatidylinositol 3-kinase/protein kinase B signal transduction (GO:0051897)	202	16	5.98	+	2.68	0.000353	0.0139
positive regulation of epithelial cell proliferation (GO:0050679)	202	16	5.98	+	2.68	0.000353	0.0139
regulation of plasma membrane bounded cell projection assembly (GO:0120032)	202	16	5.98	+	2.68	0.000353	0.0138
activation of innate immune response (GO:0002218)	177	14	5.24	+	2.67	0.00082	0.0254
regulation of anatomical structure morphogenesis (GO:0022603)	838	66	24.8	+	2.66	4.08e-13	1.78e-10
regulation of protein-containing complex assembly (GO:0043254)	432	34	12.78	+	2.66	2.51e-07	3.15e-05
regulation of response to wounding (GO:1903034)	167	13	4.94	+	2.63	0.00144	0.0397
positive regulation of phosphorus metabolic process (GO:0010562)	334	26	9.88	+	2.63	7.89e-06	0.00059
positive regulation of phosphate metabolic process (GO:0045937)	334	26	9.88	+	2.63	7.89e-06	0.000587
positive regulation of ERK1 and ERK2 cascade (GO:0070374)	193	15	5.71	+	2.63	0.00065	0.0216
MAPK cascade (GO:0000165)	219	17	6.48	+	2.62	0.000296	0.0121
response to wounding (GO:0009611)	451	35	13.35	+	2.62	2.34e-07	2.99e-05
positive regulation of phosphorylation (GO:0042327)	272	21	8.05	+	2.61	6.51e-05	0.0036
regulation of ERK1 and ERK2 cascade (GO:0070372)	285	22	8.43	+	2.61	4.41e-05	0.00253
enzyme-linked receptor protein signaling pathway (GO:0007167)	636	49	18.82	+	2.6	1.08e-09	2.26e-07
positive regulation of MAPK cascade (GO:0043410)	456	35	13.49	+	2.59	3.04e-07	3.78e-05
regulation of canonical Wnt signaling pathway (GO:0060828)	261	20	7.72	+	2.59	0.000107	0.00535
regulation of anatomical structure size (GO:0090066)	509	39	15.06	+	2.59	6.65e-08	1.03e-05
response to tumor necrosis factor (GO:0034612)	171	13	5.06	+	2.57	0.00178	0.0467
cellular response to endogenous stimulus (GO:0071495)	936	71	27.7	+	2.56	3.02e-13	1.36e-10
negative regulation of locomotion (GO:0040013)	330	25	9.77	+	2.56	1.86e-05	0.0012
cell-substrate adhesion (GO:0031589)	185	14	5.47	+	2.56	0.00126	0.0356
muscle cell development (GO:0055001)	172	13	5.09	+	2.55	0.00187	0.0485
regulation of supramolecular fiber organization (GO:1902903)	397	30	11.75	+	2.55	2.93e-06	0.000249
response to endogenous stimulus (GO:0009719)	1205	91	35.66	+	2.55	1.73e-16	1.42e-13
regulation of muscle system process (GO:0090257)	239	18	7.07	+	2.55	0.000288	0.0119
negative regulation of transport (GO:0051051)	413	31	12.22	+	2.54	2.31e-06	0.000207
blood vessel morphogenesis (GO:0048514)	442	33	13.08	+	2.52	1.23e-06	0.00012
negative regulation of apoptotic signaling pathway (GO:2001234)	229	17	6.78	+	2.51	0.000496	0.0175
import into cell (GO:0098657)	701	52	20.74	+	2.51	1.72e-09	3.36e-07
positive regulation of cell projection organization (GO:0031346)	351	26	10.39	+	2.5	1.88e-05	0.0012
cell surface receptor protein tyrosine kinase signaling pathway (GO:0007169)	432	32	12.78	+	2.5	2.1e-06	0.000191
positive regulation of intracellular signal transduction (GO:1902533)	1135	84	33.59	+	2.5	6.8e-15	3.87e-12
regulation of Wnt signaling pathway (GO:0030111)	339	25	10.03	+	2.49	2.92e-05	0.00177
positive regulation of cellular component biogenesis (GO:0044089)	502	37	14.86	+	2.49	6.14e-07	6.78e-05
regulation of cell morphogenesis (GO:0022604)	245	18	7.25	+	2.48	0.000388	0.0149
regulation of MAPK cascade (GO:0043408)	654	48	19.35	+	2.48	9.84e-09	1.72e-06
gonad development (GO:0008406)	232	17	6.87	+	2.48	0.000575	0.0199
positive regulation of protein localization (GO:1903829)	505	37	14.94	+	2.48	6.52e-07	7.11e-05
positive regulation of response to external stimulus (GO:0032103)	576	42	17.04	+	2.46	1.06e-07	1.53e-05
regulation of developmental growth (GO:0048638)	316	23	9.35	+	2.46	7.37e-05	0.00396
regulation of protein localization (GO:0032880)	907	66	26.84	+	2.46	1.49e-11	4.02e-09
extracellular matrix organization (GO:0030198)	289	21	8.55	+	2.46	0.000153	0.00723
regulation of protein kinase activity (GO:0045859)	248	18	7.34	+	2.45	0.000449	0.0166
extracellular structure organization (GO:0043062)	290	21	8.58	+	2.45	0.000161	0.00751
external encapsulating structure organization (GO:0045229)	291	21	8.61	+	2.44	0.000168	0.00782
anatomical structure homeostasis (GO:0060249)	236	17	6.98	+	2.43	0.000697	0.0227
tissue homeostasis (GO:0001894)	236	17	6.98	+	2.43	0.000697	0.0227
development of primary sexual characteristics (GO:0045137)	237	17	7.01	+	2.42	0.000731	0.0233
regulation of cellular localization (GO:0060341)	1019	73	30.15	+	2.42	2.99e-12	9.62e-10
regulation of cell growth (GO:0001558)	406	29	12.01	+	2.41	1.71e-05	0.00111
vasculature development (GO:0001944)	561	40	16.6	+	2.41	3.41e-07	4.14e-05
cellular response to oxidative stress (GO:0034599)	225	16	6.66	+	2.4	0.00113	0.0324
blood vessel development (GO:0001568)	537	38	15.89	+	2.39	8.04e-07	8.45e-05
negative regulation of cell adhesion (GO:0007162)	297	21	8.79	+	2.39	0.000348	0.0137
regulation of plasma membrane bounded cell projection organization (GO:0120035)	637	45	18.85	+	2.39	7.45e-08	1.14e-05
regulation of intracellular transport (GO:0032386)	270	19	7.99	+	2.38	0.000748	0.0238
regulation of kinase activity (GO:0043549)	270	19	7.99	+	2.38	0.000748	0.0237
regulation of cell projection organization (GO:0031344)	655	46	19.38	+	2.37	6.21e-08	9.79e-06
positive regulation of organelle organization (GO:0010638)	499	35	14.77	+	2.37	2.69e-06	0.000232
regulation of cytoskeleton organization (GO:0051493)	543	38	16.07	+	2.36	1.02e-06	0.000102
cellular response to chemical stress (GO:0062197)	287	20	8.49	+	2.35	0.000546	0.019
intracellular signaling cassette (GO:0141124)	847	59	25.06	+	2.35	1.14e-09	2.28e-07
regulation of system process (GO:0044057)	563	39	16.66	+	2.34	9.15e-07	9.22e-05
positive regulation of cellular component organization (GO:0051130)	1112	77	32.91	+	2.34	3.64e-12	1.15e-09
regulation of vesicle-mediated transport (GO:0060627)	550	38	16.28	+	2.33	1.35e-06	0.000129
response to metal ion (GO:0010038)	348	24	10.3	+	2.33	0.000146	0.00699
regulation of epithelial cell proliferation (GO:0050678)	363	25	10.74	+	2.33	0.000105	0.00533
wound healing (GO:0042060)	334	23	9.88	+	2.33	0.000209	0.00933
cell junction organization (GO:0034330)	571	39	16.9	+	2.31	1.77e-06	0.000165
regulation of cellular component biogenesis (GO:0044087)	1025	70	30.33	+	2.31	6.82e-11	1.58e-08
negative regulation of cell population proliferation (GO:0008285)	703	48	20.8	+	2.31	8.32e-08	1.23e-05
positive regulation of protein phosphorylation (GO:0001934)	249	17	7.37	+	2.31	0.0018	0.0469
positive regulation of innate immune response (GO:0045089)	308	21	9.11	+	2.3	0.000453	0.0167
positive regulation of cell adhesion (GO:0045785)	499	34	14.77	+	2.3	6.59e-06	0.000519
endosomal transport (GO:0016197)	265	18	7.84	+	2.3	0.0013	0.0365
muscle structure development (GO:0061061)	530	36	15.68	+	2.3	5.37e-06	0.000428
cell projection morphogenesis (GO:0048858)	516	35	15.27	+	2.29	7.72e-06	0.000583
locomotion (GO:0040011)	369	25	10.92	+	2.29	0.000129	0.00632
regulation of synapse organization (GO:0050807)	310	21	9.17	+	2.29	0.00048	0.0173
regulation of cellular response to growth factor stimulus (GO:0090287)	325	22	9.62	+	2.29	0.000347	0.0137
regulation of phosphorylation (GO:0042325)	458	31	13.55	+	2.29	1.93e-05	0.00123
negative regulation of intracellular signal transduction (GO:1902532)	725	49	21.45	+	2.28	7.76e-08	1.16e-05
regulation of apoptotic signaling pathway (GO:2001233)	385	26	11.39	+	2.28	9.74e-05	0.00503
inflammatory response (GO:0006954)	593	40	17.55	+	2.28	1.52e-06	0.000144
cellular response to nitrogen compound (GO:1901699)	593	40	17.55	+	2.28	1.52e-06	0.000143
cell motility (GO:0048870)	1172	79	34.68	+	2.28	7.26e-12	2.11e-09
cell adhesion (GO:0007155)	965	65	28.56	+	2.28	5.86e-10	1.26e-07
response to oxidative stress (GO:0006979)	372	25	11.01	+	2.27	0.000143	0.00688
positive regulation of defense response (GO:0031349)	447	30	13.23	+	2.27	4.83e-05	0.00272
intracellular signal transduction (GO:0035556)	1778	119	52.61	+	2.26	1.52e-17	1.5e-14
positive regulation of establishment of protein localization (GO:1904951)	329	22	9.74	+	2.26	0.000395	0.015
plasma membrane bounded cell projection morphogenesis (GO:0120039)	509	34	15.06	+	2.26	1.28e-05	0.000872
response to cytokine (GO:0034097)	840	56	24.86	+	2.25	1.53e-08	2.61e-06
regulation of synapse structure or activity (GO:0050803)	316	21	9.35	+	2.25	0.000579	0.02
cell junction assembly (GO:0034329)	303	20	8.97	+	2.23	0.00085	0.0259
phosphorylation (GO:0016310)	394	26	11.66	+	2.23	0.000136	0.00661
regulation of response to external stimulus (GO:0032101)	1108	73	32.79	+	2.23	1.21e-10	2.77e-08
cellular response to cytokine stimulus (GO:0071345)	744	49	22.02	+	2.23	1.97e-07	2.63e-05
regulation of intracellular signal transduction (GO:1902531)	2005	132	59.33	+	2.22	5.2e-19	1.54e-15
negative regulation of signal transduction (GO:0009968)	1384	91	40.96	+	2.22	4.72e-13	2e-10
tube morphogenesis (GO:0035239)	700	46	20.71	+	2.22	5.44e-07	6.16e-05
regulation of protein phosphorylation (GO:0001932)	412	27	12.19	+	2.21	0.00016	0.00748
neuron projection morphogenesis (GO:0048812)	504	33	14.91	+	2.21	2.32e-05	0.00144
kidney development (GO:0001822)	306	20	9.06	+	2.21	0.000938	0.028
response to peptide (GO:1901652)	857	56	25.36	+	2.21	3.99e-08	6.57e-06
inorganic ion homeostasis (GO:0098771)	444	29	13.14	+	2.21	8.51e-05	0.00447
positive regulation of cell-cell adhesion (GO:0022409)	337	22	9.97	+	2.21	0.000519	0.0182
cellular response to hormone stimulus (GO:0032870)	537	35	15.89	+	2.2	1.35e-05	0.00091
regulation of cell adhesion (GO:0030155)	801	52	23.7	+	2.19	1.69e-07	2.32e-05
apoptotic signaling pathway (GO:0097190)	339	22	10.03	+	2.19	0.000556	0.0193
regulation of phosphate metabolic process (GO:0019220)	604	39	17.87	+	2.18	6.81e-06	0.000531
regulation of inflammatory response (GO:0050727)	403	26	11.93	+	2.18	0.000251	0.0108
regulation of small GTPase mediated signal transduction (GO:0051056)	310	20	9.17	+	2.18	0.00107	0.0308
regulation of phosphorus metabolic process (GO:0051174)	605	39	17.9	+	2.18	6.94e-06	0.000539
negative regulation of cellular component organization (GO:0051129)	699	45	20.68	+	2.18	1.1e-06	0.000109
positive regulation of signal transduction (GO:0009967)	1605	103	47.49	+	2.17	4.88e-14	2.58e-11
chemotaxis (GO:0006935)	343	22	10.15	+	2.17	0.000968	0.0286
cellular response to oxygen-containing compound (GO:1901701)	1063	68	31.46	+	2.16	2.11e-09	4e-07
taxis (GO:0042330)	345	22	10.21	+	2.15	0.000997	0.0294
apoptotic process (GO:0006915)	1068	68	31.6	+	2.15	2.43e-09	4.5e-07
cell-cell adhesion (GO:0098609)	550	35	16.28	+	2.15	2.89e-05	0.00176
negative regulation of cell communication (GO:0010648)	1480	94	43.8	+	2.15	1.43e-12	5.45e-10
negative regulation of signaling (GO:0023057)	1481	94	43.83	+	2.14	1.48e-12	5.47e-10
cellular response to lipid (GO:0071396)	540	34	15.98	+	2.13	4.42e-05	0.00253
cell death (GO:0008219)	1112	70	32.91	+	2.13	2.61e-09	4.77e-07
positive regulation of transport (GO:0051050)	842	53	24.92	+	2.13	2.26e-07	2.91e-05
response to hormone (GO:0009725)	797	50	23.58	+	2.12	5.82e-07	6.48e-05
regulation of localization (GO:0032879)	2010	126	59.48	+	2.12	2.08e-16	1.63e-13
tube development (GO:0035295)	929	58	27.49	+	2.11	8.42e-08	1.23e-05
regulation of nervous system development (GO:0051960)	449	28	13.29	+	2.11	0.000205	0.00919
leukocyte differentiation (GO:0002521)	433	27	12.81	+	2.11	0.00027	0.0115
programmed cell death (GO:0012501)	1107	69	32.76	+	2.11	4.6e-09	8.31e-07
cell morphogenesis (GO:0000902)	724	45	21.42	+	2.1	3e-06	0.000253
neuron projection development (GO:0031175)	725	45	21.45	+	2.1	3.08e-06	0.000258
synapse organization (GO:0050808)	371	23	10.98	+	2.09	0.000902	0.0271
positive regulation of response to biotic stimulus (GO:0002833)	339	21	10.03	+	2.09	0.00165	0.0446
positive regulation of catabolic process (GO:0009896)	533	33	15.77	+	2.09	7.29e-05	0.00393
positive regulation of cell communication (GO:0010647)	1795	111	53.12	+	2.09	5.41e-14	2.76e-11
vesicle-mediated transport (GO:0016192)	1311	81	38.79	+	2.09	3.39e-10	7.5e-08
positive regulation of signaling (GO:0023056)	1797	111	53.18	+	2.09	5.7e-14	2.82e-11
positive regulation of catalytic activity (GO:0043085)	340	21	10.06	+	2.09	0.00168	0.0446
T cell activation (GO:0042110)	341	21	10.09	+	2.08	0.00172	0.0454
regulation of defense response (GO:0031347)	845	52	25.01	+	2.08	6.72e-07	7.27e-05
regulation of neuron projection development (GO:0010975)	439	27	12.99	+	2.08	0.000476	0.0173
intracellular monoatomic ion homeostasis (GO:0006873)	440	27	13.02	+	2.07	0.000483	0.0172
regulation of growth (GO:0040008)	604	37	17.87	+	2.07	4e-05	0.00234
regulation of establishment of protein localization (GO:0070201)	539	33	15.95	+	2.07	8.49e-05	0.00447
monoatomic ion homeostasis (GO:0050801)	523	32	15.48	+	2.07	0.000113	0.00562
cytoskeleton organization (GO:0007010)	1277	78	37.79	+	2.06	1.13e-09	2.29e-07
negative regulation of response to external stimulus (GO:0032102)	394	24	11.66	+	2.06	0.000817	0.0253
regulation of protein transport (GO:0051223)	444	27	13.14	+	2.05	0.000513	0.0181
regulation of cellular component organization (GO:0051128)	2486	151	73.57	+	2.05	1.64e-18	1.86e-15
regulation of transport (GO:0051049)	1599	97	47.32	+	2.05	9.3e-12	2.6e-09
monoatomic cation homeostasis (GO:0055080)	512	31	15.15	+	2.05	0.000171	0.00787
regulation of innate immune response (GO:0045088)	479	29	14.17	+	2.05	0.000298	0.0121
intracellular monoatomic cation homeostasis (GO:0030003)	431	26	12.75	+	2.04	0.000734	0.0234
cell population proliferation (GO:0008283)	747	45	22.11	+	2.04	7.35e-06	0.000564
chemical homeostasis (GO:0048878)	917	55	27.14	+	2.03	6.78e-07	7.28e-05
regulation of autophagy (GO:0010506)	367	22	10.86	+	2.03	0.00165	0.0446
positive regulation of cytokine production (GO:0001819)	504	30	14.91	+	2.01	0.00028	0.0118
negative regulation of response to stimulus (GO:0048585)	1732	103	51.25	+	2.01	6.43e-12	1.94e-09
regulation of response to biotic stimulus (GO:0002831)	574	34	16.99	+	2	0.000137	0.00664
regulation of cell-cell adhesion (GO:0022407)	508	30	15.03	+	2	0.000441	0.0163
positive regulation of apoptotic process (GO:0043065)	525	31	15.54	+	2	0.000329	0.0131
positive regulation of programmed cell death (GO:0043068)	542	32	16.04	+	2	0.000247	0.0107
response to oxygen-containing compound (GO:1901700)	1550	91	45.87	+	1.98	2.43e-10	5.45e-08
regulation of cytokine production (GO:0001817)	802	47	23.73	+	1.98	9.36e-06	0.000676
anatomical structure formation involved in morphogenesis (GO:0048646)	991	58	29.33	+	1.98	6.93e-07	7.39e-05
response to abiotic stimulus (GO:0009628)	1135	66	33.59	+	1.97	1.76e-07	2.39e-05
negative regulation of protein metabolic process (GO:0051248)	551	32	16.31	+	1.96	0.000296	0.0121
neuron development (GO:0048666)	898	52	26.57	+	1.96	4.18e-06	0.000344
multicellular organismal-level homeostasis (GO:0048871)	658	38	19.47	+	1.95	9.09e-05	0.00476
regulation of signal transduction (GO:0009966)	3101	179	91.76	+	1.95	5.93e-20	2.93e-16
intracellular chemical homeostasis (GO:0055082)	573	33	16.96	+	1.95	0.000369	0.0144
regulation of transmembrane transport (GO:0034762)	417	24	12.34	+	1.94	0.00189	0.049
circulatory system process (GO:0003013)	522	30	15.45	+	1.94	0.000558	0.0193
negative regulation of multicellular organismal process (GO:0051241)	1136	65	33.62	+	1.93	3.23e-07	3.96e-05
cellular response to chemical stimulus (GO:0070887)	1959	112	57.97	+	1.93	7.88e-12	2.24e-09
export from cell (GO:0140352)	508	29	15.03	+	1.93	0.000773	0.0244
positive regulation of response to stimulus (GO:0048584)	2296	131	67.94	+	1.93	9.65e-14	4.61e-11
regulation of developmental process (GO:0050793)	2457	140	72.71	+	1.93	9.49e-15	5.21e-12
circulatory system development (GO:0072359)	950	54	28.11	+	1.92	4.74e-06	0.000388
positive regulation of developmental process (GO:0051094)	1328	75	39.3	+	1.91	5.93e-08	9.44e-06
endomembrane system organization (GO:0010256)	585	33	17.31	+	1.91	0.000436	0.0163
response to lipid (GO:0033993)	855	48	25.3	+	1.9	2.85e-05	0.00175
positive regulation of multicellular organismal process (GO:0051240)	1661	93	49.15	+	1.89	2.24e-09	4.21e-07
negative regulation of developmental process (GO:0051093)	934	52	27.64	+	1.88	1.63e-05	0.00107
regulation of protein modification process (GO:0031399)	668	37	19.77	+	1.87	0.000269	0.0115
response to nitrogen compound (GO:1901698)	1001	55	29.62	+	1.86	1.29e-05	0.000873
regulation of cell population proliferation (GO:0042127)	1659	91	49.09	+	1.85	9.19e-09	1.62e-06
positive regulation of cell population proliferation (GO:0008284)	930	51	27.52	+	1.85	2.5e-05	0.00155
regulation of multicellular organismal process (GO:0051239)	2972	162	87.95	+	1.84	1.73e-15	1.22e-12
regulation of cell communication (GO:0010646)	3546	193	104.93	+	1.84	8.24e-19	1.53e-15
homeostatic process (GO:0042592)	1493	81	44.18	+	1.83	1.14e-07	1.63e-05
regulation of signaling (GO:0023051)	3541	192	104.78	+	1.83	2.02e-18	2.14e-15
generation of neurons (GO:0048699)	1218	66	36.04	+	1.83	1.92e-06	0.000176
regulation of catabolic process (GO:0009894)	1034	56	30.6	+	1.83	1.22e-05	0.000832
regulation of multicellular organismal development (GO:2000026)	1405	76	41.58	+	1.83	3.1e-07	3.83e-05
hemopoiesis (GO:0030097)	704	38	20.83	+	1.82	0.000385	0.0149
neurogenesis (GO:0022008)	1413	76	41.81	+	1.82	3.55e-07	4.28e-05
anatomical structure morphogenesis (GO:0009653)	2270	122	67.17	+	1.82	4.5e-11	1.06e-08
regulation of response to stress (GO:0080134)	1434	77	42.43	+	1.81	3.94e-07	4.63e-05
cell projection organization (GO:0030030)	1248	67	36.93	+	1.81	2.46e-06	0.000219
cellular homeostasis (GO:0019725)	690	37	20.42	+	1.81	0.000525	0.0183
neuron differentiation (GO:0030182)	1138	61	33.68	+	1.81	8.02e-06	0.000594
plasma membrane bounded cell projection organization (GO:0120036)	1194	64	35.33	+	1.81	3.85e-06	0.000319
regulation of programmed cell death (GO:0043067)	1513	81	44.77	+	1.81	2.14e-07	2.8e-05
positive regulation of molecular function (GO:0044093)	580	31	17.16	+	1.81	0.00165	0.0446
regulation of apoptotic process (GO:0042981)	1465	78	43.35	+	1.8	3.67e-07	4.38e-05
regulation of organelle organization (GO:0033043)	1179	62	34.89	+	1.78	1.16e-05	0.000809
cell activation (GO:0001775)	765	40	22.64	+	1.77	0.00065	0.0216
regulation of response to stimulus (GO:0048583)	4107	214	121.53	+	1.76	6.76e-19	1.43e-15
regulation of cell differentiation (GO:0045595)	1563	81	46.25	+	1.75	7.64e-07	8.09e-05
positive regulation of immune system process (GO:0002684)	1042	54	30.83	+	1.75	6.83e-05	0.00375
positive regulation of cell differentiation (GO:0045597)	869	45	25.72	+	1.75	0.000297	0.0121
membrane organization (GO:0061024)	775	40	22.93	+	1.74	0.00071	0.023
positive regulation of protein metabolic process (GO:0051247)	817	42	24.18	+	1.74	0.000654	0.0217
cell development (GO:0048468)	2307	118	68.27	+	1.73	2.06e-09	3.97e-07
negative regulation of programmed cell death (GO:0043069)	923	47	27.31	+	1.72	0.000306	0.0124
negative regulation of apoptotic process (GO:0043066)	888	45	26.28	+	1.71	0.000507	0.0179
phosphate-containing compound metabolic process (GO:0006796)	1427	72	42.23	+	1.71	1.01e-05	0.000715
regulation of molecular function (GO:0065009)	1011	51	29.92	+	1.7	0.00019	0.00867
phosphorus metabolic process (GO:0006793)	1430	72	42.32	+	1.7	1.03e-05	0.000728
intracellular transport (GO:0046907)	1200	60	35.51	+	1.69	6.84e-05	0.00374
regulation of protein metabolic process (GO:0051246)	1512	75	44.74	+	1.68	1.21e-05	0.000832
epithelium development (GO:0060429)	1129	56	33.41	+	1.68	0.000186	0.00852
tissue development (GO:0009888)	1800	89	53.27	+	1.67	1.31e-06	0.000126
negative regulation of cellular process (GO:0048523)	5027	247	148.76	+	1.66	6.73e-19	1.66e-15
system development (GO:0048731)	3629	177	107.39	+	1.65	2e-12	6.91e-10
regulation of biological quality (GO:0065008)	3003	146	88.86	+	1.64	4.72e-10	1.03e-07
negative regulation of biological process (GO:0048519)	5248	255	155.3	+	1.64	3.96e-19	1.47e-15
nervous system development (GO:0007399)	2279	110	67.44	+	1.63	1.85e-07	2.49e-05
positive regulation of cellular process (GO:0048522)	5813	279	172.02	+	1.62	8.77e-21	1.3e-16
establishment of protein localization (GO:0045184)	1318	63	39	+	1.62	0.000195	0.00886
regulation of immune system process (GO:0002682)	1653	79	48.92	+	1.62	2.03e-05	0.00128
protein localization (GO:0008104)	1988	95	58.83	+	1.61	2.62e-06	0.000231
response to chemical (GO:0042221)	3714	177	109.9	+	1.61	1.51e-11	3.92e-09
positive regulation of gene expression (GO:0010628)	1197	57	35.42	+	1.61	0.000401	0.0152
cellular macromolecule localization (GO:0070727)	1996	95	59.07	+	1.61	2.84e-06	0.000243
defense response (GO:0006952)	1515	72	44.83	+	1.61	7.25e-05	0.00392
cellular localization (GO:0051641)	2706	128	80.08	+	1.6	4.79e-08	7.72e-06
positive regulation of biological process (GO:0048518)	6113	289	180.89	+	1.6	9.11e-21	6.75e-17
cell differentiation (GO:0030154)	3752	177	111.03	+	1.59	3.82e-11	9.27e-09
multicellular organism development (GO:0007275)	4029	190	119.23	+	1.59	4.97e-12	1.53e-09
cellular developmental process (GO:0048869)	3755	177	111.12	+	1.59	3.9e-11	9.33e-09
cell surface receptor signaling pathway (GO:0007166)	2124	100	62.85	+	1.59	2.64e-06	0.00023
cellular response to stress (GO:0033554)	1648	77	48.77	+	1.58	7.24e-05	0.00393
response to stress (GO:0006950)	3539	164	104.73	+	1.57	1.09e-09	2.24e-07
establishment of localization in cell (GO:0051649)	1651	76	48.86	+	1.56	0.000105	0.00534
response to external stimulus (GO:0009605)	1981	90	58.62	+	1.54	3.58e-05	0.00211
macromolecule localization (GO:0033036)	2411	109	71.35	+	1.53	6.65e-06	0.000522
signal transduction (GO:0007165)	4942	223	146.24	+	1.52	1.91e-12	6.74e-10
negative regulation of DNA-templated transcription (GO:0045892)	1298	58	38.41	+	1.51	0.00167	0.0444
anatomical structure development (GO:0048856)	5304	237	156.96	+	1.51	5.72e-13	2.35e-10
signaling (GO:0023052)	5282	234	156.3	+	1.5	2.2e-12	7.42e-10
transport (GO:0006810)	3722	164	110.14	+	1.49	4.25e-08	6.91e-06
cell communication (GO:0007154)	5328	234	157.67	+	1.48	6.84e-12	2.03e-09
negative regulation of RNA metabolic process (GO:0051253)	1415	62	41.87	+	1.48	0.00192	0.049
negative regulation of metabolic process (GO:0009892)	2721	119	80.52	+	1.48	8.62e-06	0.000632
animal organ development (GO:0048513)	2904	127	85.93	+	1.48	4.79e-06	0.00039
cellular component organization (GO:0016043)	5717	250	169.18	+	1.48	1.02e-12	3.97e-10
negative regulation of macromolecule metabolic process (GO:0010605)	2493	108	73.77	+	1.46	3.93e-05	0.00231
developmental process (GO:0032502)	5830	252	172.52	+	1.46	2.75e-12	9.06e-10
establishment of localization (GO:0051234)	4006	172	118.54	+	1.45	1.03e-07	1.5e-05
cellular response to stimulus (GO:0051716)	6478	277	191.7	+	1.44	2.49e-13	1.15e-10
negative regulation of macromolecule biosynthetic process (GO:0010558)	2118	90	62.68	+	1.44	0.000413	0.0157
negative regulation of biosynthetic process (GO:0009890)	2191	93	64.84	+	1.43	0.000385	0.0148
cellular component organization or biogenesis (GO:0071840)	5931	251	175.51	+	1.43	3.42e-11	8.75e-09
cellular component assembly (GO:0022607)	2516	106	74.45	+	1.42	0.000156	0.00735
localization (GO:0051179)	4549	191	134.61	+	1.42	7.58e-08	1.15e-05
organelle organization (GO:0006996)	3086	129	91.32	+	1.41	3.17e-05	0.00191
positive regulation of macromolecule biosynthetic process (GO:0010557)	2554	106	75.58	+	1.4	0.000283	0.0119
positive regulation of metabolic process (GO:0009893)	3458	143	102.33	+	1.4	1.68e-05	0.0011
positive regulation of biosynthetic process (GO:0009891)	2665	110	78.86	+	1.39	0.000286	0.0119
response to stimulus (GO:0050896)	8280	341	245.02	+	1.39	1.9e-15	1.28e-12
immune system process (GO:0002376)	2409	99	71.29	+	1.39	0.000673	0.0222
positive regulation of macromolecule metabolic process (GO:0010604)	3138	125	92.86	+	1.35	0.000379	0.0147
multicellular organismal process (GO:0032501)	6408	248	189.62	+	1.31	3.82e-07	4.52e-05
regulation of cellular process (GO:0050794)	11417	438	337.85	+	1.3	3.26e-17	3.01e-14
regulation of biological process (GO:0050789)	11815	453	349.63	+	1.3	1.13e-18	1.4e-15
regulation of metabolic process (GO:0019222)	6273	237	185.63	+	1.28	7.44e-06	0.000569
biological regulation (GO:0065007)	12219	459	361.58	+	1.27	5.79e-17	5.04e-14
regulation of primary metabolic process (GO:0080090)	5174	187	153.11	+	1.22	0.00173	0.0454
regulation of macromolecule metabolic process (GO:0060255)	5709	206	168.94	+	1.22	0.000922	0.0276
cellular process (GO:0009987)	15563	530	460.54	+	1.15	1.78e-12	6.42e-10
biological_process (GO:0008150)	17724	575	524.49	+	1.1	3.73e-11	9.21e-09
sensory perception (GO:0007600)	1002	12	29.65	-	0.4	0.000253	0.0109
Unclassified (UNCLASSIFIED)	2856	34	84.51	-	0.4	3.73e-11	9.37e-09
RNA processing (GO:0006396)	879	10	26.01	-	0.38	0.000476	0.0173
detection of stimulus (GO:0051606)	690	5	20.42	-	0.24	7.92e-05	0.0042
ribonucleoprotein complex biogenesis (GO:0022613)	453	3	13.41	-	0.22	0.0011	0.0316
detection of chemical stimulus (GO:0009593)	523	2	15.48	-	0.13	3.55e-05	0.00213
sensory perception of chemical stimulus (GO:0007606)	551	2	16.31	-	0.12	1.72e-05	0.00112
ribosome biogenesis (GO:0042254)	311	1	9.2	-	0.11	0.00189	0.0489
detection of stimulus involved in sensory perception (GO:0050906)	564	1	16.69	-	0.06	1.56e-06	0.000147
detection of chemical stimulus involved in sensory perception of smell (GO:0050911)	440	0	13.02	-	< 0.01	2.68e-06	0.000232
detection of chemical stimulus involved in sensory perception (GO:0050907)	487	0	14.41	-	< 0.01	8.81e-07	8.94e-05
sensory perception of smell (GO:0007608)	472	0	13.97	-	< 0.01	1.27e-06	0.000123

## Sheet: GSF-S_log2FC > 0.5
Analysis Type:	PANTHER Overrepresentation Test (Released 20240807)
Annotation Version and Release Date:	GO Ontology database DOI: 10.5281/zenodo.15066566 Released 2025-03-16
Analyzed List:	Client Text Box Input (Homo sapiens)
Reference List:	Homo sapiens (all genes in database)
Test Type:	FISHER
Correction:	FDR
GO biological process complete	Homo sapiens - REFLIST (20580)	Client Text Box Input (67)	Client Text Box Input (expected)	Client Text Box Input (over/under)	Client Text Box Input (fold Enrichment)	Client Text Box Input (raw P-value)	Client Text Box Input (FDR)
regulation of smooth muscle cell proliferation (GO:0048660)	136	6	0.44	+	13.55	5.34e-06	0.0264
neurogenesis (GO:0022008)	1413	16	4.6	+	3.48	8.88e-06	0.0219
regulation of signaling (GO:0023051)	3541	31	11.53	+	2.69	3.28e-08	0.000487
regulation of cell communication (GO:0010646)	3546	31	11.54	+	2.69	3.4e-08	0.000252
regulation of signal transduction (GO:0009966)	3101	25	10.1	+	2.48	6.62e-06	0.0196
system development (GO:0048731)	3629	28	11.81	+	2.37	5.41e-06	0.0201
cell differentiation (GO:0030154)	3752	27	12.21	+	2.21	2.16e-05	0.0355
cellular developmental process (GO:0048869)	3755	27	12.22	+	2.21	2.18e-05	0.0324
regulation of response to stimulus (GO:0048583)	4107	29	13.37	+	2.17	1.75e-05	0.0324
multicellular organism development (GO:0007275)	4029	28	13.12	+	2.13	3.28e-05	0.0442
multicellular organismal process (GO:0032501)	6408	38	20.86	+	1.82	1.56e-05	0.033
